# Supplementary material for: N-Heterocyclic carbene derivatives to modify gold superatom characteristics. Tailorable electronic and optical properties of [Au11(PPh3)7LCl2]+ as a cluster from relativistic DFT
Source: Royal Society of Chemistry journal article supplement (doi:10.1039/d1cp04310b), 2022-01-01
Supplement: d1cp04310b2.pdf [file d1cp04310b2.pdf]

Supporting Information for:

**N-Heterocyclic Carbene Derivatives to Modify Gold Superatoms Characteristics. Tailorable Electronic and Optical Properties for  $[\text{Au}_{11}(\text{PPh}_3)_7\text{LCl}_2]^+$  as Cluster from Relativistic DFT**

Alvaro Muñoz-Castro<sup>a\*</sup>

*<sup>a</sup>Laboratorio de Química Inorgánica y Materiales Moleculares, Facultad de Ingeniería, Universidad Autónoma de Chile, El Llano Subercaseaux 2801, Santiago, Chile.*

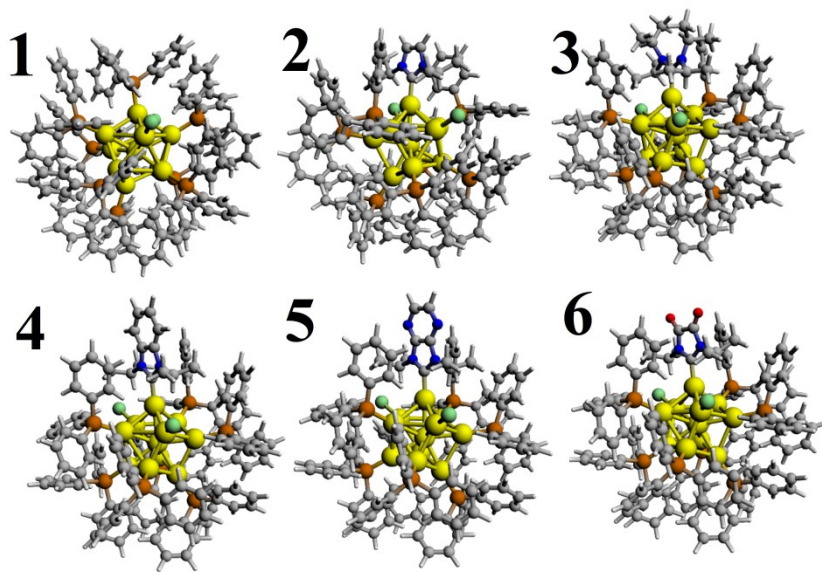

Figure S1. Representation of optimized structures for 1-6.

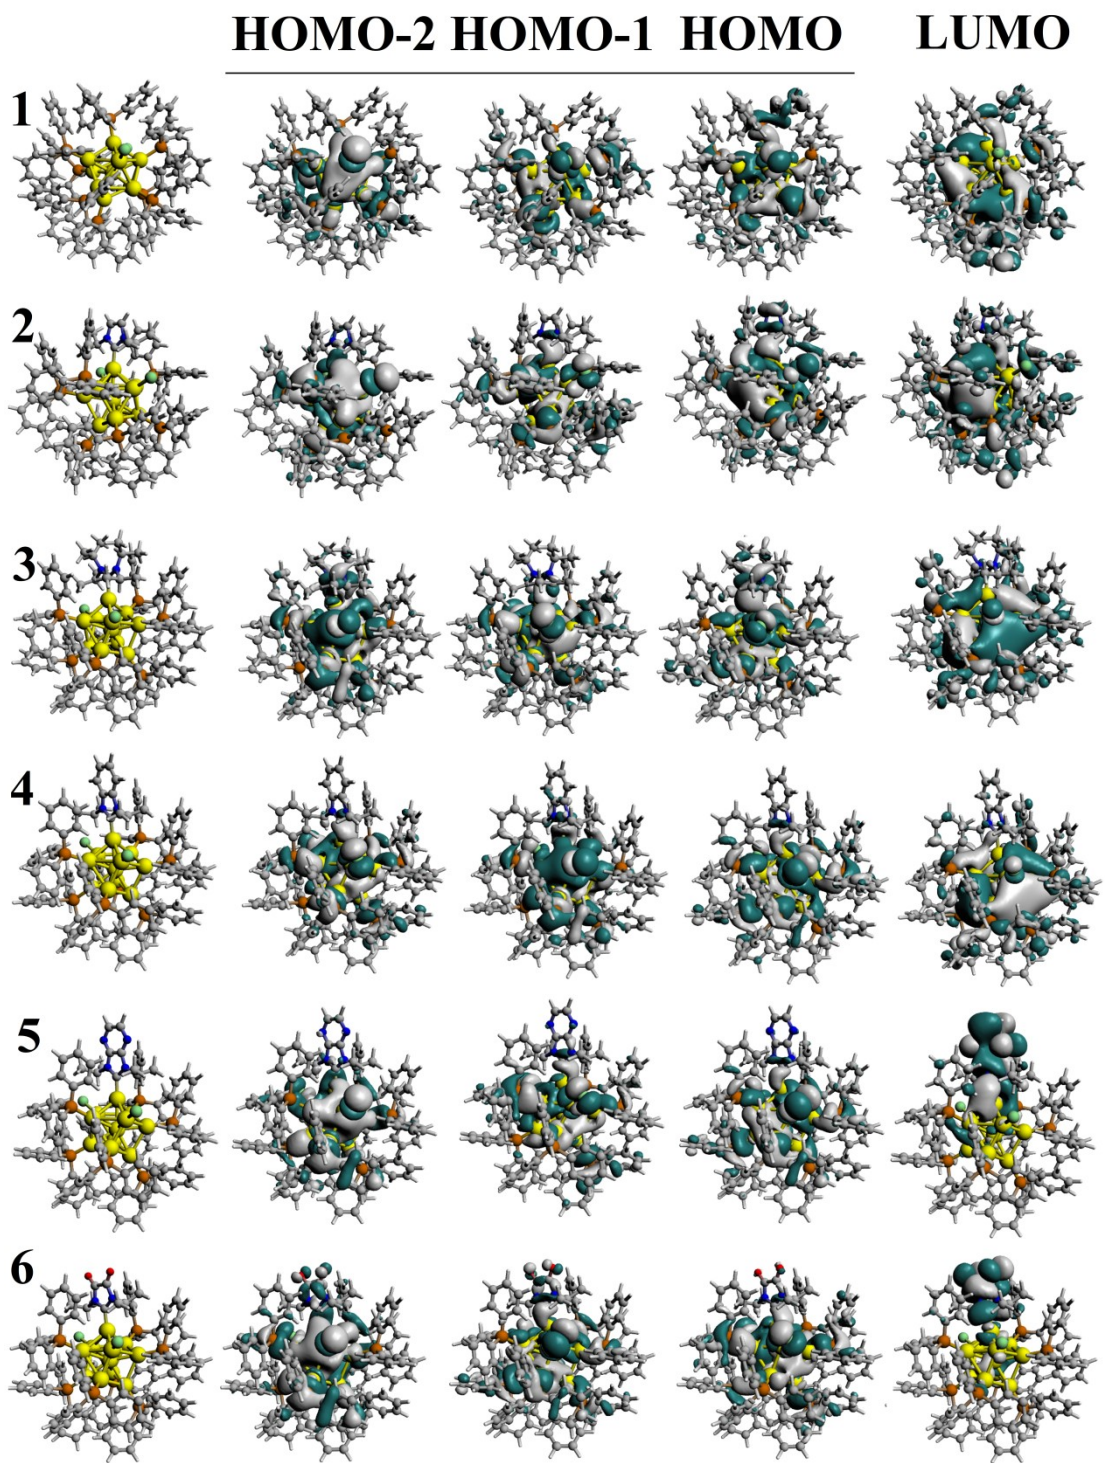

Figure S2. Isosurface representation of HOMO and LUMO for **1-6**.



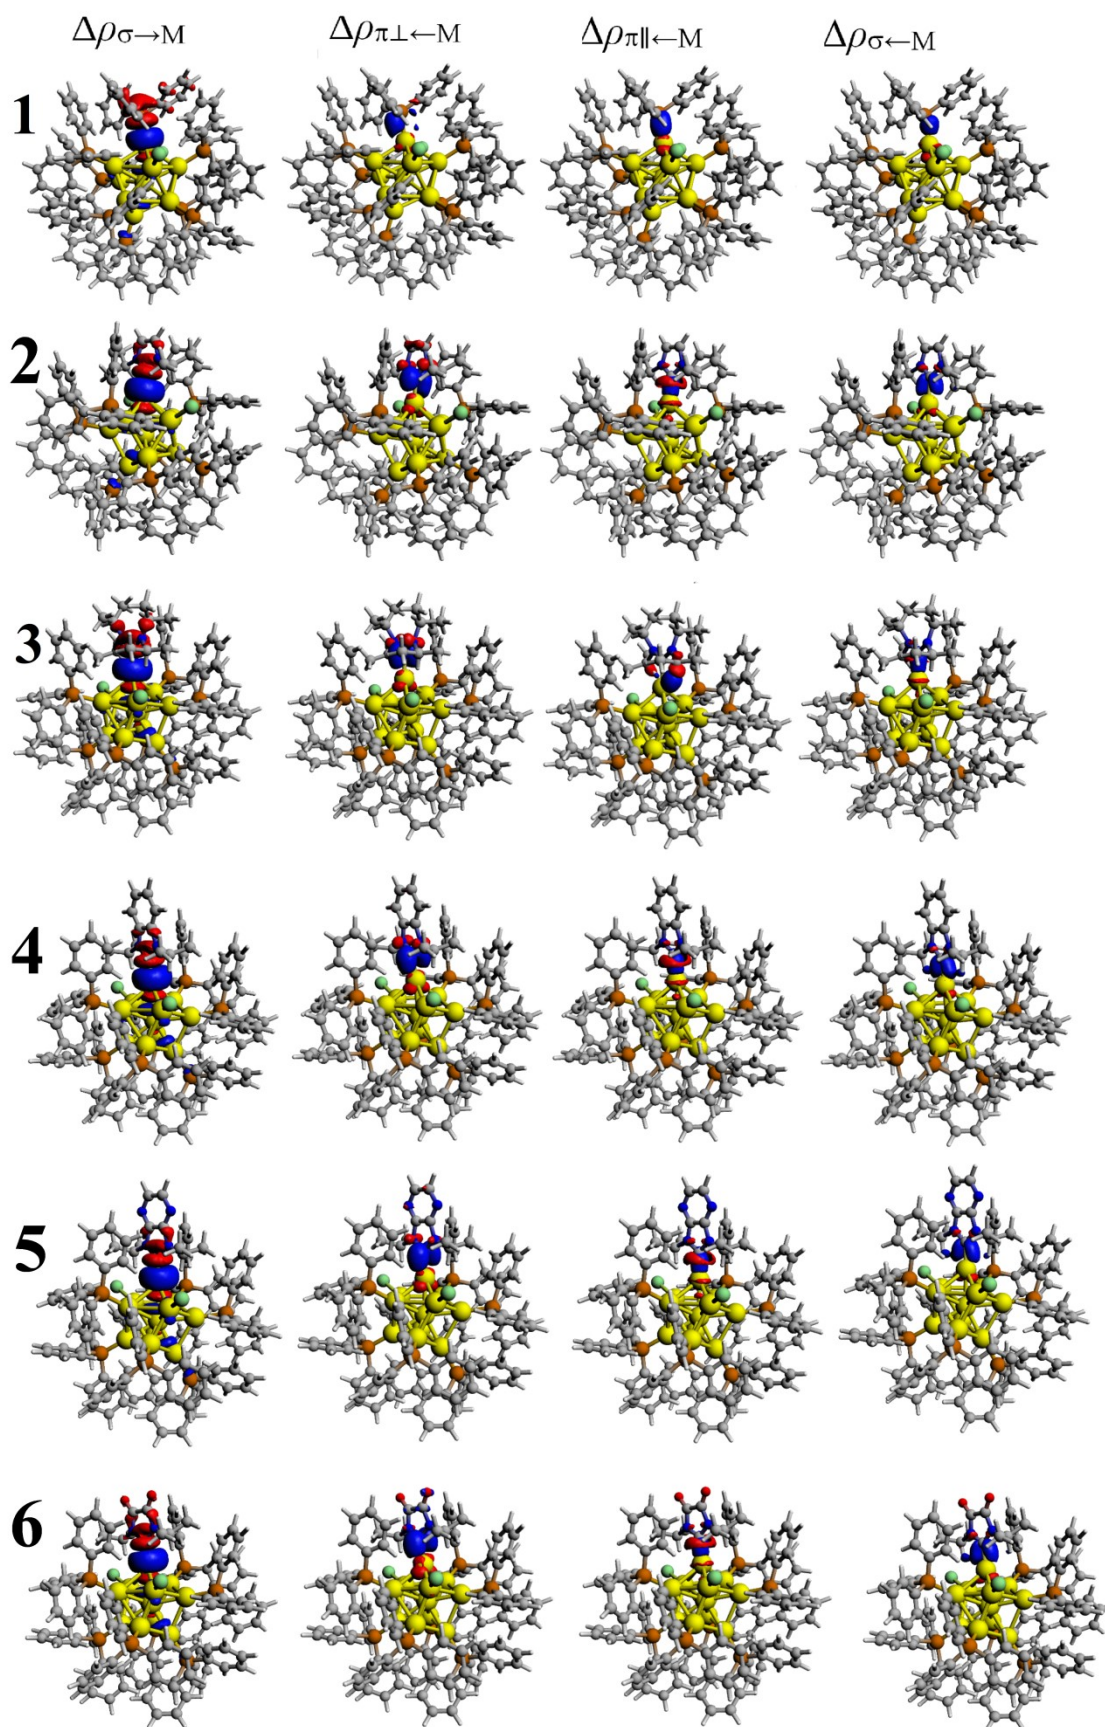

Figure S3. Isosurface representation of main deformation densities from NOCV-EDA analysis for 1-6.

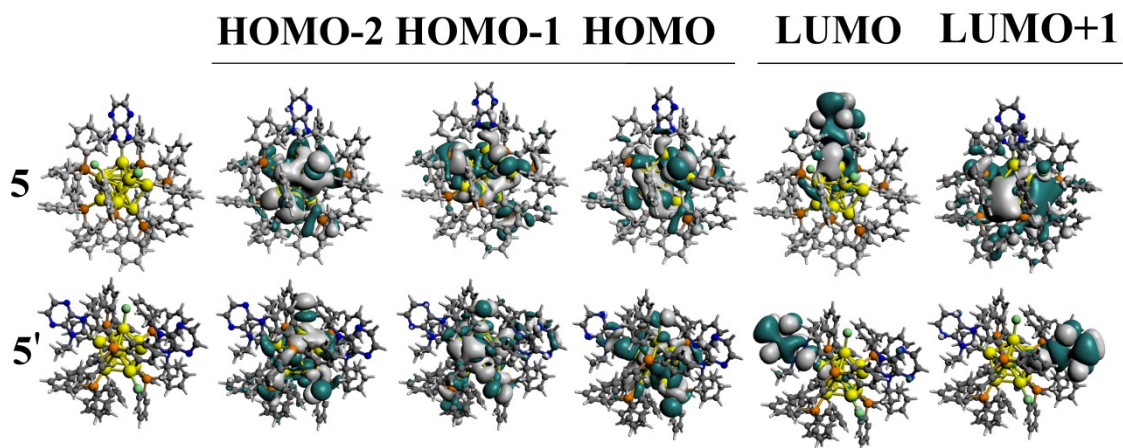

Figure S4. Isosurface representation of HOMO and LUMO for **5** and **5'**.

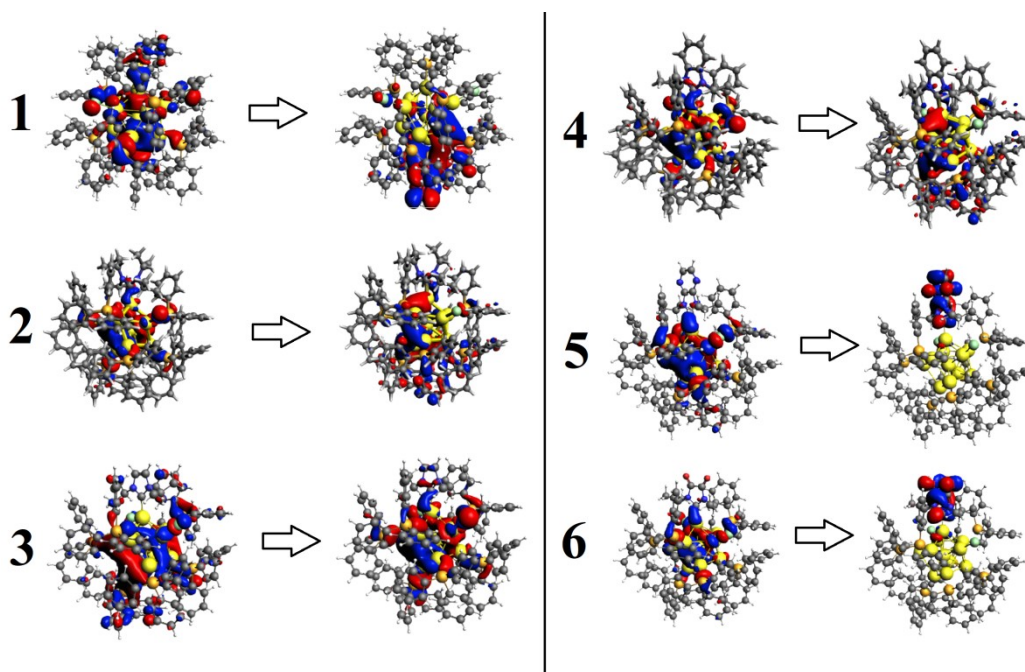

Figure S5. Isosurface representation of Natural Transition Orbitals (NTO) related to Further analysis of the optical HOMO-LUMO transition ( $S_0 \rightarrow S_1$ ) transition for **1-6**, which contribute above of 96% to the transition in all cases.

Table S1. Distances Au<sup>P/C</sup>-P/C and Au<sup>Cent</sup>-Au<sup>P/C</sup> (Å) for clusters **1** to **6** at ground state (S<sub>0</sub>), first triplet excited state (T<sub>1</sub>) and first singlet excited state (S<sub>1</sub>).

|                                              | <b>1</b>       |                |                | <b>2</b>       |                |                | <b>3</b>       |                |                |
|----------------------------------------------|----------------|----------------|----------------|----------------|----------------|----------------|----------------|----------------|----------------|
|                                              | S <sub>0</sub> | T <sub>1</sub> | S <sub>1</sub> | S <sub>0</sub> | T <sub>1</sub> | S <sub>1</sub> | S <sub>0</sub> | T <sub>1</sub> | S <sub>1</sub> |
| Au <sup>Cent</sup> -Au <sup>C</sup>          | 2.807          | 2.718          | 2.887          | 2.787          | 2.750          | 2.742          | 2.786          | 2.721          | 2.730          |
| Au <sup>Cent</sup> -Au <sup>P</sup>          | 2.684          | 2.679          | 2.687          | 2.697          | 2.675          | 2.657          | 2.683          | 2.660          | 2.670          |
|                                              | 2.693          | 2.679          | 2.709          | 2.701          | 2.688          | 2.714          | 2.688          | 2.675          | 2.698          |
|                                              | 2.709          | 2.692          | 2.714          | 2.701          | 2.694          | 2.716          | 2.696          | 2.676          | 2.698          |
|                                              | 2.723          | 2.692          | 2.725          | 2.703          | 2.718          | 2.750          | 2.697          | 2.681          | 2.700          |
|                                              | 2.743          | 2.725          | 2.734          | 2.724          | 2.720          | 2.764          | 2.704          | 2.691          | 2.710          |
|                                              | 2.751          | 2.725          | 2.737          | 2.764          | 2.720          | 2.865          | 2.741          | 2.758          | 2.806          |
|                                              | 2.753          | 2.763          | 2.749          | 2.769          | 2.765          | 2.865          | 2.760          | 2.759          | 2.821          |
| Average Au <sup>Cent</sup> -Au <sup>P</sup>  | 2.722          | 2.708          | 2.722          | 2.723          | 2.711          | 2.762          | 2.710          | 2.700          | 2.729          |
| Au <sup>Cent</sup> -Au <sup>Cl</sup>         | 2.803          | 2.818          | 2.798          | 2.795          | 2.797          | 2.788          | 2.807          | 2.844          | 2.878          |
| Au <sup>Cent</sup> -Au <sup>Cl</sup>         | 2.815          | 2.837          | 2.830          | 2.806          | 2.869          | 2.836          | 2.836          | 2.954          | 2.892          |
| Average Au <sup>Cent</sup> -Au <sup>Cl</sup> | 2.809          | 2.827          | 2.814          | 2.800          | 2.833          | 2.812          | 2.821          | 2.899          | 2.885          |
|                                              |                |                |                |                |                |                |                |                |                |
|                                              | <b>4</b>       |                |                | <b>5</b>       |                |                | <b>6</b>       |                |                |
|                                              | S <sub>0</sub> | T <sub>1</sub> | S <sub>1</sub> | S <sub>0</sub> | T <sub>1</sub> | S <sub>1</sub> | S <sub>0</sub> | T <sub>1</sub> | S <sub>1</sub> |
| Au <sup>Cent</sup> -Au <sup>C</sup>          | 2.733          | 2.726          | 2.754          | 2.733          | 2.752          | 2.732          | 2.703          | 2.760          | 2.723          |
| Au <sup>Cent</sup> -Au <sup>P</sup>          | 2.673          | 2.663          | 2.669          | 2.676          | 2.677          | 2.674          | 2.676          | 2.671          | 2.672          |
|                                              | 2.690          | 2.665          | 2.680          | 2.692          | 2.680          | 2.691          | 2.682          | 2.674          | 2.672          |
|                                              | 2.695          | 2.691          | 2.667          | 2.701          | 2.681          | 2.700          | 2.711          | 2.679          | 2.684          |
|                                              | 2.722          | 2.691          | 2.740          | 2.703          | 2.687          | 2.702          | 2.712          | 2.686          | 2.730          |
|                                              | 2.739          | 2.714          | 2.753          | 2.710          | 2.702          | 2.708          | 2.717          | 2.698          | 2.731          |
|                                              | 2.748          | 2.718          | 2.746          | 2.742          | 2.750          | 2.741          | 2.739          | 2.734          | 2.737          |
|                                              | 2.798          | 2.789          | 2.782          | 2.769          | 2.750          | 2.765          | 2.773          | 2.742          | 2.758          |
| Average Au <sup>Cent</sup> -Au <sup>P</sup>  | 2.724          | 2.704          | 2.720          | 2.713          | 2.704          | 2.712          | 2.716          | 2.698          | 2.712          |
| Au <sup>Cent</sup> -Au <sup>Cl</sup>         | 2.792          | 2.834          | 2.825          | 2.809          | 2.804          | 2.808          | 2.815          | 2.817          | 2.848          |
| Au <sup>Cent</sup> -Au <sup>Cl</sup>         | 2.819          | 2.904          | 2.837          | 2.847          | 2.833          | 2.846          | 2.827          | 2.817          | 2.846          |
| Average Au <sup>Cent</sup> -Au <sup>Cl</sup> | 2.805          | 2.869          | 2.831          | 2.828          | 2.819          | 2.827          | 2.821          | 2.817          | 2.847          |

Table S2. Energy (eV) and wavelength (nm) for the relevant transitions calculated for the studied species. 1P and 1D, stands from orbitals compromising the superatomic shell manifold; PPh<sub>3</sub> and NHC, accounts for orbitals involving mainly the PPh<sub>3</sub> and NHC ligands, respectively, whereas 5d, accountos for orbitals located at the 5d-Au block.

|           | E (eV) | $\lambda$ (nm) | Composition  | Character                         |
|-----------|--------|----------------|--------------|-----------------------------------|
| <b>1</b>  | 1.963  | 631            | 479a -> 480a | 1P $\rightarrow$ 1D               |
|           | 2.756  | 450            | 474a -> 481a | 1P $\rightarrow$ 1D               |
|           | 2.871  | 432            | 476a -> 489a | 1P $\rightarrow$ PPh <sub>3</sub> |
|           | 3.012  | 412            | 474a -> 489a | 5d $\rightarrow$ PPh <sub>3</sub> |
| <b>2</b>  | 2.140  | 579            | 464a -> 465a | 1P $\rightarrow$ 1D               |
|           | 2.702  | 459            | 464a -> 504a | 1P $\rightarrow$ PPh <sub>3</sub> |
|           | 2.747  | 451            | 464a -> 505a | 1P $\rightarrow$ PPh <sub>3</sub> |
|           | 3.032  | 408            | 464a -> 510a | 5d $\rightarrow$ PPh <sub>3</sub> |
| <b>3</b>  | 2.121  | 585            | 478a -> 479a | 1P $\rightarrow$ 1D               |
|           | 2.777  | 446            | 477a -> 519a | 1P $\rightarrow$ PPh <sub>3</sub> |
|           | 2.877  | 431            | 478a -> 522a | 1P $\rightarrow$ PPh <sub>3</sub> |
|           | 2.992  | 414            | 476a -> 524a | 5d $\rightarrow$ PPh <sub>3</sub> |
| <b>4</b>  | 2.127  | 583            | 473a -> 474a | 1P $\rightarrow$<br>1D/NHC        |
|           | 2.693  | 460            | 473a -> 511a | 1P $\rightarrow$ PPh <sub>3</sub> |
|           | 2.806  | 442            | 468a -> 477a | 1P $\rightarrow$ PPh <sub>3</sub> |
|           | 3.082  | 402            | 466a -> 483a | 5d $\rightarrow$ PPh <sub>3</sub> |
| <b>5</b>  | 1.523  | 814            | 473a -> 474a | 1P $\rightarrow$ NHC              |
|           | 2.632  | 471            | 473a -> 511a | 1P $\rightarrow$ PPh <sub>3</sub> |
|           | 2.684  | 462            | 471a -> 511a | 1P $\rightarrow$ PPh <sub>3</sub> |
|           | 3.023  | 410            | 467a -> 482a | 5d $\rightarrow$ NHC              |
| <b>6</b>  | 1.292  | 960            | 469a -> 470a | 1P $\rightarrow$ NHC              |
|           | 2.586  | 479            | 467a -> 494a | 1P $\rightarrow$ PPh <sub>3</sub> |
|           | 2.622  | 473            | 467a -> 496a | 1P $\rightarrow$ PPh <sub>3</sub> |
|           | 2.989  | 415            | 444a -> 470a | 5d $\rightarrow$ NHC              |
| <b>5'</b> | 1.308  | 948            | 467a -> 468a | 1P $\rightarrow$ NHC              |
|           | 2.614  | 474            | 465a -> 500a | 1P $\rightarrow$ PPh <sub>3</sub> |
|           | 2.785  | 445            | 467a -> 508a | 1P $\rightarrow$ PPh <sub>3</sub> |
|           | 3.077  | 403            | 463a -> 485a | 5d $\rightarrow$ NHC              |

Table S3. Optimized coordinates for the studied species (Å), in a multiXYZ format.

285

1 S0

|    |              |              |              |
|----|--------------|--------------|--------------|
| Au | 2.640000000  | 5.462400000  | 21.710700000 |
| Au | 1.268200000  | 3.497900000  | 20.248000000 |
| Au | 1.777600000  | 3.214300000  | 23.169600000 |
| Au | -0.058100000 | 5.216700000  | 22.196800000 |
| Au | 0.999200000  | 6.641700000  | 19.768300000 |
| Au | 3.550600000  | 5.142100000  | 19.143000000 |
| Au | 4.159700000  | 3.247300000  | 21.362500000 |
| Au | 3.076700000  | 5.593400000  | 24.355600000 |
| Au | 1.445300000  | 7.627800000  | 22.849800000 |
| Au | 3.591700000  | 7.890600000  | 20.834700000 |
| Au | 5.264500000  | 5.889200000  | 22.136000000 |
| Cl | 1.016400000  | 1.281300000  | 24.322900000 |
| Cl | -0.374800000 | 7.687200000  | 18.117200000 |
| P  | -0.117400000 | 2.088500000  | 19.069100000 |
| P  | -2.232600000 | 5.297800000  | 22.901400000 |
| P  | 4.103600000  | 4.906600000  | 16.922300000 |
| P  | 5.213200000  | 1.226500000  | 21.597200000 |
| P  | 3.460800000  | 5.638600000  | 26.628600000 |
| P  | 0.580000000  | 9.669500000  | 23.493500000 |
| P  | 4.406500000  | 9.922700000  | 20.101200000 |
| P  | 7.511800000  | 6.347700000  | 22.320000000 |
| C  | 0.682800000  | 1.501200000  | 17.535900000 |
| C  | -0.002800000 | 1.357800000  | 16.321200000 |
| H  | -1.063200000 | 1.606900000  | 16.258100000 |
| C  | 0.685700000  | 0.922600000  | 15.184500000 |
| H  | 0.155800000  | 0.824900000  | 14.236700000 |
| C  | 2.051000000  | 0.628300000  | 15.259400000 |
| H  | 2.587800000  | 0.301400000  | 14.366500000 |
| C  | 2.732300000  | 0.765000000  | 16.473000000 |
| H  | 3.798000000  | 0.543600000  | 16.536800000 |
| C  | 2.055400000  | 1.209200000  | 17.607800000 |
| H  | 2.594500000  | 1.334900000  | 18.550200000 |
| C  | -0.633500000 | 0.574600000  | 19.961200000 |
| C  | -0.964900000 | -0.604600000 | 19.272900000 |
| H  | -0.878200000 | -0.645900000 | 18.186200000 |
| C  | -1.383000000 | -1.730200000 | 19.986000000 |
| H  | -1.640700000 | -2.644600000 | 19.450700000 |
| C  | -1.454000000 | -1.690200000 | 21.384200000 |
| H  | -1.764800000 | -2.577200000 | 21.938800000 |
| C  | -1.098000000 | -0.524400000 | 22.068000000 |
| H  | -1.100900000 | -0.486900000 | 23.156400000 |
| C  | -0.694100000 | 0.608200000  | 21.359600000 |
| H  | -0.398900000 | 1.505500000  | 21.903400000 |
| C  | -1.671000000 | 2.928400000  | 18.572700000 |
| C  | -1.684500000 | 4.331200000  | 18.514100000 |
| H  | -0.792900000 | 4.902800000  | 18.773100000 |
| C  | -2.835100000 | 5.013500000  | 18.122200000 |
| H  | -2.809500000 | 6.102600000  | 18.084100000 |
| C  | -3.986700000 | 4.296400000  | 17.785500000 |
| H  | -4.891300000 | 4.827600000  | 17.485300000 |
| C  | -3.983500000 | 2.897600000  | 17.848000000 |
| H  | -4.884900000 | 2.336600000  | 17.599400000 |



|   |              |              |              |
|---|--------------|--------------|--------------|
| C | -2.834700000 | 2.211700000  | 18.247400000 |
| H | -2.849600000 | 1.123400000  | 18.322200000 |
| C | -3.019700000 | 6.829600000  | 22.277100000 |
| C | -2.572800000 | 7.305700000  | 21.030800000 |
| H | -1.785800000 | 6.779900000  | 20.487900000 |
| C | -3.115500000 | 8.466400000  | 20.482800000 |
| H | -2.733900000 | 8.822400000  | 19.524100000 |
| C | -4.111900000 | 9.163500000  | 21.177000000 |
| H | -4.531700000 | 10.080100000 | 20.759100000 |
| C | -4.561500000 | 8.693100000  | 22.416200000 |
| H | -5.330600000 | 9.240000000  | 22.965800000 |
| C | -4.019500000 | 7.530200000  | 22.969800000 |
| H | -4.359700000 | 7.187500000  | 23.946900000 |
| C | -2.329700000 | 5.250600000  | 24.733100000 |
| C | -3.564800000 | 5.094100000  | 25.385200000 |
| H | -4.477000000 | 4.978500000  | 24.798600000 |
| C | -3.618900000 | 5.054200000  | 26.780300000 |
| H | -4.579900000 | 4.934100000  | 27.281500000 |
| C | -2.440600000 | 5.149900000  | 27.530500000 |
| H | -2.482400000 | 5.111300000  | 28.620200000 |
| C | -1.206300000 | 5.274500000  | 26.885400000 |
| H | -0.285800000 | 5.335000000  | 27.466700000 |
| C | -1.148800000 | 5.319600000  | 25.491100000 |
| H | -0.181600000 | 5.403600000  | 24.987500000 |
| C | -3.310900000 | 3.915400000  | 22.388800000 |
| C | -4.388400000 | 4.097500000  | 21.508700000 |
| H | -4.609700000 | 5.089200000  | 21.110800000 |
| C | -5.178200000 | 3.002100000  | 21.147400000 |
| H | -6.015000000 | 3.146400000  | 20.462200000 |
| C | -4.895800000 | 1.731900000  | 21.658100000 |
| H | -5.514700000 | 0.878700000  | 21.376600000 |
| C | -3.809900000 | 1.550100000  | 22.525000000 |
| H | -3.578100000 | 0.557400000  | 22.910800000 |
| C | -3.010500000 | 2.633600000  | 22.886200000 |
| H | -2.154900000 | 2.488500000  | 23.551900000 |
| C | 2.637400000  | 4.938900000  | 15.828500000 |
| C | 2.760200000  | 5.271200000  | 14.466400000 |
| H | 3.737100000  | 5.525200000  | 14.050500000 |
| C | 1.624000000  | 5.315800000  | 13.657400000 |
| H | 1.722600000  | 5.575400000  | 12.602500000 |
| C | 0.361700000  | 5.051200000  | 14.204900000 |
| H | -0.527000000 | 5.102000000  | 13.573300000 |
| C | 0.235600000  | 4.744300000  | 15.561700000 |
| H | -0.746000000 | 4.564700000  | 16.000800000 |
| C | 1.369600000  | 4.684900000  | 16.372400000 |
| H | 1.266900000  | 4.465100000  | 17.435500000 |
| C | 5.069100000  | 3.390300000  | 16.557800000 |
| C | 5.122300000  | 2.836900000  | 15.267500000 |
| H | 4.531200000  | 3.272600000  | 14.461300000 |
| C | 5.910200000  | 1.710200000  | 15.023000000 |
| H | 5.940800000  | 1.280000000  | 14.020500000 |
| C | 6.649700000  | 1.130500000  | 16.062000000 |
| H | 7.265900000  | 0.250300000  | 15.870200000 |
| C | 6.593500000  | 1.673800000  | 17.349800000 |
| H | 7.170500000  | 1.230300000  | 18.162500000 |
| C | 5.797600000  | 2.794200000  | 17.601200000 |

|   |              |              |              |
|---|--------------|--------------|--------------|
| H | 5.733300000  | 3.198900000  | 18.614600000 |
| C | 5.129500000  | 6.288600000  | 16.298500000 |
| C | 6.341300000  | 6.122500000  | 15.614600000 |
| H | 6.728400000  | 5.121200000  | 15.419200000 |
| C | 7.047400000  | 7.246900000  | 15.170100000 |
| H | 7.994600000  | 7.115600000  | 14.644800000 |
| C | 6.538200000  | 8.529500000  | 15.389100000 |
| H | 7.090600000  | 9.404300000  | 15.043500000 |
| C | 5.323900000  | 8.695800000  | 16.065700000 |
| H | 4.925600000  | 9.693500000  | 16.252500000 |
| C | 4.628600000  | 7.581700000  | 16.529700000 |
| H | 3.692500000  | 7.710300000  | 17.075200000 |
| C | 4.220200000  | -0.096100000 | 20.834500000 |
| C | 4.503700000  | -0.598000000 | 19.552700000 |
| H | 5.387300000  | -0.261800000 | 19.010700000 |
| C | 3.637800000  | -1.517000000 | 18.959800000 |
| H | 3.862900000  | -1.902500000 | 17.964700000 |
| C | 2.479100000  | -1.922700000 | 19.630000000 |
| H | 1.794500000  | -2.629400000 | 19.161000000 |
| C | 2.180700000  | -1.398800000 | 20.891800000 |
| H | 1.263700000  | -1.690600000 | 21.403500000 |
| C | 3.039100000  | -0.481900000 | 21.496800000 |
| H | 2.779200000  | -0.055500000 | 22.469300000 |
| C | 5.410300000  | 0.784300000  | 23.365500000 |
| C | 5.240800000  | 1.775600000  | 24.345200000 |
| H | 4.871500000  | 2.766600000  | 24.065900000 |
| C | 5.530500000  | 1.488700000  | 25.680700000 |
| H | 5.407000000  | 2.261400000  | 26.438900000 |
| C | 5.960600000  | 0.210400000  | 26.046800000 |
| H | 6.177000000  | -0.009100000 | 27.093700000 |
| C | 6.094200000  | -0.791900000 | 25.077400000 |
| H | 6.410100000  | -1.796000000 | 25.364100000 |
| C | 5.823300000  | -0.506300000 | 23.737900000 |
| H | 5.926100000  | -1.286300000 | 22.982100000 |
| C | 6.908100000  | 1.103700000  | 20.917600000 |
| C | 7.527000000  | -0.125300000 | 20.626200000 |
| H | 6.980100000  | -1.058800000 | 20.756400000 |
| C | 8.837800000  | -0.147400000 | 20.147700000 |
| H | 9.309500000  | -1.101700000 | 19.908800000 |
| C | 9.547400000  | 1.049600000  | 19.982100000 |
| H | 10.573800000 | 1.026800000  | 19.612800000 |
| C | 8.942500000  | 2.271300000  | 20.290200000 |
| H | 9.487300000  | 3.208000000  | 20.168400000 |
| C | 7.623300000  | 2.297500000  | 20.745900000 |
| H | 7.136600000  | 3.250200000  | 20.961900000 |
| C | 2.217900000  | 6.561500000  | 27.603900000 |
| C | 1.582500000  | 7.663300000  | 27.013100000 |
| H | 1.799200000  | 7.918400000  | 25.975500000 |
| C | 0.673200000  | 8.423600000  | 27.750100000 |
| H | 0.191900000  | 9.283100000  | 27.286900000 |
| C | 0.365700000  | 8.064700000  | 29.063600000 |
| H | -0.359500000 | 8.650300000  | 29.630200000 |
| C | 0.979600000  | 6.951600000  | 29.648400000 |
| H | 0.735200000  | 6.664500000  | 30.670900000 |
| C | 1.912800000  | 6.204600000  | 28.927300000 |
| H | 2.391400000  | 5.338800000  | 29.385700000 |

|   |              |              |              |
|---|--------------|--------------|--------------|
| C | 5.066900000  | 6.426000000  | 27.020300000 |
| C | 5.146100000  | 7.717900000  | 27.562100000 |
| H | 4.235200000  | 8.264400000  | 27.811200000 |
| C | 6.397500000  | 8.304400000  | 27.779500000 |
| H | 6.450900000  | 9.307700000  | 28.203500000 |
| C | 7.569300000  | 7.605900000  | 27.472100000 |
| H | 8.543300000  | 8.064700000  | 27.644500000 |
| C | 7.491000000  | 6.321100000  | 26.921400000 |
| H | 8.397300000  | 5.775200000  | 26.660000000 |
| C | 6.247400000  | 5.739800000  | 26.678100000 |
| H | 6.197200000  | 4.748000000  | 26.226300000 |
| C | 3.524400000  | 3.987500000  | 27.412400000 |
| C | 2.638200000  | 3.013100000  | 26.929200000 |
| H | 1.978300000  | 3.229700000  | 26.088600000 |
| C | 2.622000000  | 1.737900000  | 27.494900000 |
| H | 1.951600000  | 0.988200000  | 27.075100000 |
| C | 3.486900000  | 1.431100000  | 28.549800000 |
| H | 3.484700000  | 0.428500000  | 28.982300000 |
| C | 4.368700000  | 2.401600000  | 29.039700000 |
| H | 5.046800000  | 2.162800000  | 29.859500000 |
| C | 4.390100000  | 3.680600000  | 28.476400000 |
| H | 5.083100000  | 4.433300000  | 28.853000000 |
| C | 1.714500000  | 10.454900000 | 24.712200000 |
| C | 1.272000000  | 11.410300000 | 25.642000000 |
| H | 0.237000000  | 11.754900000 | 25.619700000 |
| C | 2.142500000  | 11.886500000 | 26.625300000 |
| H | 1.789400000  | 12.620300000 | 27.350000000 |
| C | 3.453700000  | 11.402800000 | 26.697000000 |
| H | 4.124300000  | 11.760000000 | 27.480600000 |
| C | 3.898000000  | 10.457700000 | 25.770900000 |
| H | 4.913300000  | 10.067900000 | 25.818400000 |
| C | 3.038400000  | 9.989100000  | 24.778400000 |
| H | 3.386700000  | 9.236800000  | 24.066700000 |
| C | 0.360200000  | 10.805800000 | 22.078800000 |
| C | 0.066200000  | 10.238400000 | 20.828600000 |
| H | 0.048900000  | 9.154600000  | 20.701100000 |
| C | -0.206900000 | 11.059700000 | 19.734500000 |
| H | -0.419200000 | 10.594900000 | 18.771400000 |
| C | -0.194800000 | 12.449900000 | 19.885100000 |
| H | -0.405400000 | 13.092700000 | 19.029000000 |
| C | 0.098100000  | 13.018300000 | 21.131200000 |
| H | 0.119900000  | 14.102500000 | 21.246100000 |
| C | 0.382400000  | 12.200900000 | 22.227200000 |
| H | 0.641400000  | 12.644700000 | 23.189200000 |
| C | -1.045500000 | 9.681900000  | 24.339100000 |
| C | -1.966900000 | 10.733100000 | 24.213400000 |
| H | -1.769200000 | 11.558100000 | 23.529800000 |
| C | -3.146900000 | 10.714600000 | 24.961800000 |
| H | -3.860200000 | 11.532500000 | 24.859100000 |
| C | -3.417100000 | 9.651800000  | 25.830300000 |
| H | -4.342200000 | 9.640600000  | 26.409600000 |
| C | -2.512400000 | 8.594200000  | 25.938000000 |
| H | -2.717300000 | 7.748400000  | 26.594000000 |
| C | -1.336600000 | 8.606900000  | 25.187100000 |
| H | -0.638200000 | 7.775900000  | 25.263000000 |
| C | 4.349700000  | 11.268200000 | 21.335200000 |

|   |              |              |              |
|---|--------------|--------------|--------------|
| C | 3.469800000  | 12.351900000 | 21.225100000 |
| H | 2.764100000  | 12.404500000 | 20.395400000 |
| C | 3.494300000  | 13.365200000 | 22.189200000 |
| H | 2.803200000  | 14.204000000 | 22.100500000 |
| C | 4.391800000  | 13.301800000 | 23.257400000 |
| H | 4.409300000  | 14.095900000 | 24.005700000 |
| C | 5.260700000  | 12.209400000 | 23.372200000 |
| H | 5.955200000  | 12.144300000 | 24.209400000 |
| C | 5.234900000  | 11.189400000 | 22.424400000 |
| H | 5.912600000  | 10.338600000 | 22.517500000 |
| C | 3.531500000  | 10.551600000 | 18.613100000 |
| C | 3.952900000  | 11.726500000 | 17.965700000 |
| H | 4.786900000  | 12.303400000 | 18.365300000 |
| C | 3.307900000  | 12.150400000 | 16.803300000 |
| H | 3.638000000  | 13.062600000 | 16.305100000 |
| C | 2.251100000  | 11.399300000 | 16.269700000 |
| H | 1.761600000  | 11.725800000 | 15.350400000 |
| C | 1.829400000  | 10.233800000 | 16.912200000 |
| H | 1.007300000  | 9.633900000  | 16.521800000 |
| C | 2.462100000  | 9.818500000  | 18.086100000 |
| H | 2.112600000  | 8.914700000  | 18.586300000 |
| C | 6.171500000  | 9.918900000  | 19.587400000 |
| C | 6.948500000  | 11.089800000 | 19.644100000 |
| H | 6.539700000  | 11.995000000 | 20.093900000 |
| C | 8.251600000  | 11.090300000 | 19.144800000 |
| H | 8.848200000  | 12.002400000 | 19.196400000 |
| C | 8.786900000  | 9.925000000  | 18.582800000 |
| H | 9.803900000  | 9.926300000  | 18.186800000 |
| C | 8.021100000  | 8.757600000  | 18.535900000 |
| H | 8.431800000  | 7.847000000  | 18.101400000 |
| C | 6.719600000  | 8.748500000  | 19.045400000 |
| H | 6.122800000  | 7.834900000  | 19.007000000 |
| C | 8.382700000  | 6.028100000  | 20.726900000 |
| C | 9.773700000  | 6.180500000  | 20.596800000 |
| H | 10.366800000 | 6.531800000  | 21.440600000 |
| C | 10.403500000 | 5.871400000  | 19.388800000 |
| H | 11.482400000 | 5.998100000  | 19.294400000 |
| C | 9.655700000  | 5.381700000  | 18.311400000 |
| H | 10.151100000 | 5.126500000  | 17.373800000 |
| C | 8.275200000  | 5.210900000  | 18.441600000 |
| H | 7.686800000  | 4.819900000  | 17.613700000 |
| C | 7.639200000  | 5.542500000  | 19.638600000 |
| H | 6.557400000  | 5.414700000  | 19.731700000 |
| C | 8.416800000  | 5.307900000  | 23.530700000 |
| C | 7.873200000  | 4.059000000  | 23.869000000 |
| H | 6.916800000  | 3.747900000  | 23.445400000 |
| C | 8.545400000  | 3.217900000  | 24.755500000 |
| H | 8.107300000  | 2.253500000  | 25.014100000 |
| C | 9.765300000  | 3.621400000  | 25.308500000 |
| H | 10.291500000 | 2.966800000  | 26.003500000 |
| C | 10.308000000 | 4.869400000  | 24.980400000 |
| H | 11.250800000 | 5.191800000  | 25.423900000 |
| C | 9.634600000  | 5.716300000  | 24.098700000 |
| H | 10.038000000 | 6.704400000  | 23.872600000 |
| C | 7.881700000  | 8.059500000  | 22.853200000 |
| C | 7.355200000  | 8.447300000  | 24.100900000 |

|      |              |              |              |
|------|--------------|--------------|--------------|
| H    | 6.745100000  | 7.750300000  | 24.680000000 |
| C    | 7.626500000  | 9.719700000  | 24.603100000 |
| H    | 7.236900000  | 10.002200000 | 25.581100000 |
| C    | 8.388800000  | 10.625300000 | 23.856500000 |
| H    | 8.590100000  | 11.624300000 | 24.245500000 |
| C    | 8.872100000  | 10.256200000 | 22.599400000 |
| H    | 9.440600000  | 10.965000000 | 21.997500000 |
| C    | 8.625900000  | 8.974200000  | 22.096500000 |
| H    | 8.997800000  | 8.700100000  | 21.109500000 |
| 285  |              |              |              |
| 1 T1 |              |              |              |
| Au   | -0.282600000 | -0.403100000 | 0.284800000  |
| Au   | -2.228600000 | -1.285600000 | -1.395300000 |
| Au   | 0.260400000  | -2.988500000 | -0.695000000 |
| Au   | -1.679100000 | -2.509600000 | 1.400300000  |
| Au   | -2.897300000 | 0.352100000  | 1.086100000  |
| Au   | -1.393900000 | 1.465000000  | -1.469700000 |
| Au   | 0.604500000  | -0.610700000 | -2.247900000 |
| Au   | 1.739000000  | -1.611300000 | 1.588300000  |
| Au   | -0.581700000 | -0.195400000 | 2.985100000  |
| Au   | -0.204200000 | 2.112100000  | 1.204600000  |
| Au   | 2.032600000  | 0.854700000  | -0.201200000 |
| Cl   | 0.939700000  | -5.117600000 | -1.497900000 |
| Cl   | -5.097100000 | 0.951800000  | 1.830800000  |
| P    | -3.919000000 | -1.904600000 | -2.774000000 |
| P    | -2.366200000 | 3.232400000  | -2.571700000 |
| P    | 1.404400000  | -1.091400000 | -4.324500000 |
| P    | 3.562600000  | -2.686900000 | 2.462200000  |
| P    | -0.754600000 | 0.037200000  | 5.271700000  |
| P    | -0.276900000 | 4.297900000  | 1.883200000  |
| P    | 4.047100000  | 1.842000000  | -0.632400000 |
| C    | -3.421400000 | -2.157400000 | -4.507600000 |
| C    | -2.464200000 | -1.292700000 | -5.046200000 |
| H    | -2.018400000 | -0.531100000 | -4.405000000 |
| C    | -2.051600000 | -1.440400000 | -6.366500000 |
| H    | -1.309600000 | -0.758600000 | -6.778200000 |
| C    | -2.553000000 | -2.483800000 | -7.141500000 |
| H    | -2.194900000 | -2.623300000 | -8.162000000 |
| C    | -3.493200000 | -3.361700000 | -6.601800000 |
| H    | -3.878500000 | -4.187100000 | -7.201700000 |
| C    | -3.943600000 | -3.192400000 | -5.293200000 |
| H    | -4.681300000 | -3.879500000 | -4.877900000 |
| C    | -5.206800000 | -0.616900000 | -2.807200000 |
| C    | -5.585300000 | -0.051600000 | -1.578000000 |
| H    | -5.155100000 | -0.408700000 | -0.640500000 |
| C    | -6.498200000 | 0.994800000  | -1.548200000 |
| H    | -6.759300000 | 1.434800000  | -0.584200000 |
| C    | -7.041900000 | 1.479500000  | -2.741500000 |
| H    | -7.740800000 | 2.315800000  | -2.721300000 |
| C    | -6.680900000 | 0.904400000  | -3.961400000 |
| H    | -7.107500000 | 1.277800000  | -4.893200000 |
| C    | -5.755600000 | -0.136000000 | -4.003500000 |
| H    | -5.452000000 | -0.561500000 | -4.962600000 |
| C    | -4.720100000 | -3.468200000 | -2.331800000 |
| C    | -6.105400000 | -3.607100000 | -2.238700000 |
| H    | -6.754700000 | -2.742400000 | -2.386500000 |



|   |              |              |              |
|---|--------------|--------------|--------------|
| C | -6.652400000 | -4.860000000 | -1.961600000 |
| H | -7.732100000 | -4.970200000 | -1.867100000 |
| C | -5.821400000 | -5.966100000 | -1.812800000 |
| H | -6.243400000 | -6.948600000 | -1.593100000 |
| C | -4.438700000 | -5.823800000 | -1.923400000 |
| H | -3.788200000 | -6.686300000 | -1.811500000 |
| C | -3.879400000 | -4.575900000 | -2.150100000 |
| H | -2.793900000 | -4.455100000 | -2.183500000 |
| C | -1.101800000 | 4.389200000  | -3.226100000 |
| C | 0.194100000  | 4.349900000  | -2.689200000 |
| H | 0.417800000  | 3.672000000  | -1.861400000 |
| C | 1.193500000  | 5.159200000  | -3.225000000 |
| H | 2.202200000  | 5.111900000  | -2.815200000 |
| C | 0.906700000  | 6.025600000  | -4.278900000 |
| H | 1.695100000  | 6.656400000  | -4.696500000 |
| C | -0.387200000 | 6.087800000  | -4.798000000 |
| H | -0.615000000 | 6.765600000  | -5.621700000 |
| C | -1.389300000 | 5.264100000  | -4.282400000 |
| H | -2.386500000 | 5.278400000  | -4.726600000 |
| C | -3.395000000 | 2.889500000  | -4.042900000 |
| C | -4.604300000 | 3.553500000  | -4.279400000 |
| H | -5.015700000 | 4.231900000  | -3.530600000 |
| C | -5.282000000 | 3.341300000  | -5.477400000 |
| H | -6.219300000 | 3.867700000  | -5.658800000 |
| C | -4.776900000 | 2.451300000  | -6.426100000 |
| H | -5.315400000 | 2.283500000  | -7.357000000 |
| C | -3.588500000 | 1.767800000  | -6.178100000 |
| H | -3.199800000 | 1.055600000  | -6.906000000 |
| C | -2.899500000 | 1.987300000  | -4.992500000 |
| H | -1.960600000 | 1.471000000  | -4.808100000 |
| C | -3.468300000 | 4.213000000  | -1.505500000 |
| C | -4.303600000 | 3.500000000  | -0.641600000 |
| H | -4.229200000 | 2.415000000  | -0.570700000 |
| C | -5.222000000 | 4.180200000  | 0.149100000  |
| H | -5.849500000 | 3.605400000  | 0.826500000  |
| C | -5.291000000 | 5.571700000  | 0.104000000  |
| H | -5.985300000 | 6.104800000  | 0.753700000  |
| C | -4.456400000 | 6.284400000  | -0.754100000 |
| H | -4.507300000 | 7.373500000  | -0.786900000 |
| C | -3.552200000 | 5.607500000  | -1.570900000 |
| H | -2.902000000 | 6.165000000  | -2.242900000 |
| C | 3.222100000  | -1.246000000 | -4.310300000 |
| C | 3.767300000  | -2.293100000 | -3.545700000 |
| H | 3.105900000  | -3.008600000 | -3.054300000 |
| C | 5.149200000  | -2.405400000 | -3.419900000 |
| H | 5.578700000  | -3.216600000 | -2.833200000 |
| C | 5.988500000  | -1.476100000 | -4.028000000 |
| H | 7.069300000  | -1.559600000 | -3.903600000 |
| C | 5.444400000  | -0.442000000 | -4.785700000 |
| H | 6.094900000  | 0.282000000  | -5.269300000 |
| C | 4.060300000  | -0.324500000 | -4.933300000 |
| H | 3.636900000  | 0.488800000  | -5.523600000 |
| C | 0.821200000  | -2.687700000 | -4.987200000 |
| C | -0.263200000 | -3.326400000 | -4.371800000 |
| H | -0.717700000 | -2.892200000 | -3.483500000 |
| C | -0.757000000 | -4.520700000 | -4.887800000 |

|   |              |              |              |
|---|--------------|--------------|--------------|
| H | -1.599500000 | -5.012400000 | -4.400000000 |
| C | -0.172200000 | -5.083300000 | -6.020100000 |
| H | -0.562500000 | -6.015400000 | -6.431100000 |
| C | 0.933300000  | -4.471600000 | -6.616800000 |
| H | 1.414900000  | -4.930800000 | -7.480700000 |
| C | 1.442600000  | -3.285000000 | -6.092800000 |
| H | 2.339800000  | -2.836800000 | -6.523800000 |
| C | 1.012600000  | 0.214000000  | -5.551300000 |
| C | 1.059200000  | 0.002800000  | -6.937200000 |
| H | 1.311500000  | -0.978500000 | -7.337800000 |
| C | 0.736100000  | 1.036100000  | -7.814300000 |
| H | 0.754800000  | 0.858900000  | -8.891900000 |
| C | 0.386300000  | 2.291500000  | -7.317400000 |
| H | 0.131200000  | 3.099300000  | -8.004700000 |
| C | 0.348700000  | 2.511100000  | -5.940000000 |
| H | 0.068200000  | 3.486700000  | -5.545100000 |
| C | 0.649300000  | 1.475600000  | -5.059500000 |
| H | 0.576600000  | 1.635500000  | -3.979800000 |
| C | 4.552400000  | -3.562700000 | 1.194600000  |
| C | 5.861000000  | -3.987200000 | 1.448800000  |
| H | 6.364400000  | -3.704300000 | 2.372600000  |
| C | 6.528600000  | -4.763100000 | 0.506500000  |
| H | 7.550300000  | -5.088500000 | 0.703700000  |
| C | 5.889800000  | -5.134100000 | -0.680800000 |
| H | 6.412900000  | -5.757600000 | -1.406800000 |
| C | 4.583500000  | -4.719900000 | -0.928600000 |
| H | 4.055400000  | -5.028900000 | -1.831800000 |
| C | 3.920700000  | -3.922600000 | 0.000800000  |
| H | 2.896300000  | -3.615200000 | -0.201300000 |
| C | 4.721800000  | -1.548000000 | 3.320300000  |
| C | 4.660300000  | -0.184500000 | 3.000700000  |
| H | 3.927300000  | 0.160400000  | 2.266800000  |
| C | 5.519600000  | 0.719600000  | 3.620200000  |
| H | 5.466700000  | 1.780100000  | 3.367400000  |
| C | 6.450500000  | 0.267800000  | 4.558200000  |
| H | 7.120000000  | 0.977200000  | 5.047700000  |
| C | 6.515600000  | -1.091000000 | 4.881500000  |
| H | 7.233900000  | -1.445600000 | 5.624200000  |
| C | 5.651000000  | -1.998000000 | 4.271300000  |
| H | 5.677000000  | -3.050600000 | 4.559900000  |
| C | 3.285900000  | -4.024900000 | 3.688000000  |
| C | 3.355500000  | -5.374200000 | 3.316400000  |
| H | 3.582900000  | -5.656800000 | 2.286200000  |
| C | 3.156200000  | -6.368100000 | 4.276200000  |
| H | 3.195400000  | -7.415300000 | 3.979900000  |
| C | 2.918900000  | -6.027200000 | 5.606600000  |
| H | 2.777200000  | -6.809100000 | 6.355800000  |
| C | 2.848000000  | -4.683800000 | 5.974000000  |
| H | 2.656700000  | -4.403200000 | 7.011700000  |
| C | 2.993100000  | -3.687400000 | 5.015500000  |
| H | 2.909300000  | -2.642000000 | 5.300900000  |
| C | 0.756700000  | -0.609800000 | 6.071200000  |
| C | 1.976900000  | -0.118400000 | 5.579900000  |
| H | 1.996600000  | 0.476500000  | 4.664700000  |
| C | 3.159700000  | -0.390800000 | 6.257400000  |
| H | 4.102300000  | 0.006000000  | 5.882600000  |

|   |              |              |              |
|---|--------------|--------------|--------------|
| C | 3.141500000  | -1.198100000 | 7.397200000  |
| H | 4.073900000  | -1.425500000 | 7.915800000  |
| C | 1.937300000  | -1.731900000 | 7.853600000  |
| H | 1.919800000  | -2.366200000 | 8.740700000  |
| C | 0.740600000  | -1.429900000 | 7.201300000  |
| H | -0.209000000 | -1.810400000 | 7.583000000  |
| C | -2.183600000 | -0.840000000 | 6.012700000  |
| C | -2.430800000 | -2.159100000 | 5.713100000  |
| H | -0.807900000 | -3.178400000 | 4.414500000  |
| C | -3.461800000 | -2.922700000 | 6.190100000  |
| H | -3.554400000 | -3.983400000 | 5.959000000  |
| C | -4.404600000 | -2.264300000 | 6.992900000  |
| H | -5.268900000 | -2.813800000 | 7.370300000  |
| C | -4.223200000 | -0.918200000 | 7.320400000  |
| H | -4.949400000 | -0.410800000 | 7.955200000  |
| C | -3.119900000 | -0.203300000 | 6.855400000  |
| H | -2.979800000 | 0.843700000  | 7.130400000  |
| C | -0.849200000 | 1.714400000  | 5.973400000  |
| C | -0.158400000 | 2.088100000  | 7.131300000  |
| H | 0.453800000  | 1.361600000  | 7.668600000  |
| C | -0.232000000 | 3.406200000  | 7.580700000  |
| H | 0.321700000  | 3.703600000  | 8.469600000  |
| C | -0.998200000 | 4.346500000  | 6.889900000  |
| H | -1.042700000 | 5.381800000  | 7.236100000  |
| C | -1.709000000 | 3.966900000  | 5.753700000  |
| H | -2.319000000 | 4.697300000  | 5.223100000  |
| C | -1.631700000 | 2.654600000  | 5.292600000  |
| H | -2.168400000 | 2.352100000  | 4.394300000  |
| C | 0.200500000  | 5.583700000  | 0.677200000  |
| C | 1.557600000  | 5.810300000  | 0.411500000  |
| H | 2.317900000  | 5.240900000  | 0.944400000  |
| C | 1.930200000  | 6.780200000  | -0.513000000 |
| H | 2.988700000  | 6.961900000  | -0.697000000 |
| C | 0.956700000  | 7.509000000  | -1.201900000 |
| H | 1.252800000  | 8.267500000  | -1.928900000 |
| C | -0.393200000 | 7.255700000  | -0.969800000 |
| H | -1.155900000 | 7.811500000  | -1.517800000 |
| C | -0.774800000 | 6.300400000  | -0.028900000 |
| H | -1.830800000 | 6.115500000  | 0.160100000  |
| C | 0.827600000  | 4.583900000  | 3.328000000  |
| C | 1.245200000  | 3.469700000  | 4.071800000  |
| H | 0.954500000  | 2.467500000  | 3.747100000  |
| C | 2.016900000  | 3.640800000  | 5.216200000  |
| H | 2.328300000  | 2.768800000  | 5.793200000  |
| C | 2.380500000  | 4.925400000  | 5.625000000  |
| H | 2.984500000  | 5.062700000  | 6.522200000  |
| C | 1.987500000  | 6.035400000  | 4.875400000  |
| H | 2.286400000  | 7.038900000  | 5.182200000  |
| C | 1.214700000  | 5.868800000  | 3.729100000  |
| H | 0.935100000  | 6.738800000  | 3.134700000  |
| C | -1.941000000 | 4.817500000  | 2.463900000  |
| C | -2.196800000 | 6.129900000  | 2.891500000  |
| H | -1.425300000 | 6.894500000  | 2.814300000  |
| C | -3.441900000 | 6.462100000  | 3.415500000  |
| H | -3.633900000 | 7.486000000  | 3.742700000  |
| C | -4.428100000 | 5.482900000  | 3.548200000  |

|   |              |              |              |
|---|--------------|--------------|--------------|
| H | -5.390300000 | 5.740500000  | 3.992500000  |
| C | -4.182400000 | 4.182600000  | 3.113200000  |
| H | -4.937100000 | 3.400600000  | 3.196500000  |
| C | -2.952600000 | 3.858200000  | 2.548200000  |
| H | -2.785600000 | 2.843100000  | 2.185500000  |
| C | 4.304600000  | 3.363400000  | 0.349200000  |
| C | 3.910400000  | 3.329000000  | 1.696500000  |
| H | 3.380000000  | 2.459200000  | 2.087900000  |
| C | 4.169300000  | 4.414300000  | 2.526500000  |
| H | 3.871400000  | 4.379300000  | 3.573300000  |
| C | 4.780000000  | 5.558100000  | 2.011600000  |
| H | 4.963400000  | 6.414700000  | 2.662200000  |
| C | 5.137300000  | 5.610400000  | 0.665500000  |
| H | 5.603100000  | 6.507700000  | 0.257500000  |
| C | 4.910000000  | 4.512300000  | -0.166600000 |
| H | 5.202500000  | 4.553700000  | -1.217100000 |
| C | 5.453000000  | 0.784200000  | -0.157000000 |
| C | 6.530600000  | 1.233900000  | 0.613900000  |
| H | 6.563400000  | 2.265900000  | 0.968200000  |
| C | 7.556600000  | 0.347600000  | 0.946400000  |
| H | 8.381800000  | 0.687300000  | 1.574400000  |
| C | 7.524100000  | -0.968600000 | 0.483000000  |
| H | 8.323900000  | -1.664600000 | 0.745700000  |
| C | 6.463900000  | -1.403000000 | -0.315100000 |
| H | 6.441900000  | -2.424500000 | -0.691600000 |
| C | 5.415800000  | -0.540800000 | -0.616000000 |
| H | 4.568200000  | -0.890700000 | -1.210700000 |
| C | 4.420500000  | 2.307600000  | -2.357700000 |
| C | 5.734200000  | 2.379800000  | -2.822100000 |
| H | 6.558300000  | 2.082500000  | -2.170400000 |
| C | 5.977800000  | 2.816900000  | -4.124800000 |
| H | 6.999700000  | 2.876100000  | -4.486700000 |
| C | 4.917600000  | 3.172600000  | -4.966400000 |
| H | 5.105200000  | 3.516300000  | -5.988400000 |
| C | 3.613700000  | 3.075500000  | -4.511300000 |
| H | 2.785500000  | 3.328600000  | -5.175200000 |
| C | 3.363400000  | 2.638000000  | -3.209400000 |
| H | 2.346100000  | 2.536600000  | -2.850000000 |
| P | -2.772600000 | -4.297000000 | 2.367500000  |
| C | -1.850800000 | -5.011200000 | 3.798800000  |
| C | -2.090100000 | -6.336600000 | 4.176000000  |
| H | -2.752500000 | -6.965800000 | 3.584600000  |
| C | -1.480000000 | -6.871700000 | 5.313300000  |
| H | -1.702900000 | -7.897900000 | 5.607600000  |
| C | -0.601800000 | -6.097100000 | 6.061800000  |
| H | -0.149600000 | -6.502900000 | 6.969400000  |
| C | -0.322700000 | -4.796800000 | 5.661600000  |
| H | 0.337400000  | -4.166300000 | 6.252500000  |
| C | -0.893900000 | -4.259800000 | 4.500600000  |
| H | -0.640200000 | -1.998500000 | 2.769600000  |
| C | -4.418300000 | -3.854800000 | 3.036200000  |
| C | -5.101700000 | -4.663600000 | 3.959500000  |
| H | -4.672300000 | -5.612900000 | 4.294100000  |
| C | -6.315200000 | -4.235400000 | 4.489100000  |
| H | -6.838400000 | -4.864200000 | 5.214200000  |
| C | -6.854400000 | -3.001900000 | 4.105800000  |

|   |              |              |              |
|---|--------------|--------------|--------------|
| H | -7.802500000 | -2.669300000 | 4.530300000  |
| C | -6.180500000 | -2.193800000 | 3.187600000  |
| H | -6.574900000 | -1.220900000 | 2.883700000  |
| C | -4.969800000 | -2.620300000 | 2.651000000  |
| H | -4.447400000 | -1.970300000 | 1.943700000  |
| C | -2.972500000 | -5.789800000 | 1.329800000  |
| C | -4.119800000 | -6.590100000 | 1.340800000  |
| H | -5.026000000 | -6.249600000 | 1.845700000  |
| C | -4.097600000 | -7.831700000 | 0.704200000  |
| H | -4.985800000 | -8.463000000 | 0.725500000  |
| C | -2.952300000 | -8.258100000 | 0.031700000  |
| H | -2.939000000 | -9.232300000 | -0.456900000 |
| C | -1.832600000 | -7.426600000 | -0.038900000 |
| H | -0.941900000 | -7.722000000 | -0.596800000 |
| C | -1.838000000 | -6.197400000 | 0.612600000  |
| H | -0.949600000 | -5.565000000 | 0.560400000  |

285

1 S1

|    |              |              |              |
|----|--------------|--------------|--------------|
| Au | 2.630158000  | 5.392622000  | 21.668118000 |
| Au | 1.896268000  | 3.040191000  | 20.164261000 |
| Au | 2.045424000  | 3.130845000  | 23.207314000 |
| Au | 0.034644000  | 4.528533000  | 21.743776000 |
| Au | 1.292207000  | 6.722074000  | 19.558634000 |
| Au | 3.588164000  | 5.082864000  | 19.147257000 |
| Au | 4.464497000  | 3.387559000  | 21.255178000 |
| Au | 2.889954000  | 5.682139000  | 24.326481000 |
| Au | 1.145012000  | 7.350043000  | 22.809949000 |
| Au | 3.398490000  | 7.898608000  | 20.889117000 |
| Au | 5.097164000  | 5.950344000  | 22.682984000 |
| Cl | 1.345473000  | 1.161331000  | 24.359748000 |
| Cl | -0.066449000 | 7.593556000  | 17.788513000 |
| P  | 0.167134000  | 1.926663000  | 19.106578000 |
| P  | -2.038893000 | 5.037676000  | 22.543388000 |
| P  | 4.212625000  | 5.049987000  | 16.934265000 |
| P  | 5.521958000  | 1.420547000  | 21.755470000 |
| P  | 3.259985000  | 5.733182000  | 26.603452000 |
| P  | 0.323998000  | 9.454484000  | 23.320877000 |
| P  | 4.387107000  | 9.879491000  | 20.270208000 |
| P  | 7.317169000  | 6.441849000  | 22.504265000 |
| C  | 0.643880000  | 1.496930000  | 17.394436000 |
| C  | -0.301420000 | 1.424519000  | 16.363681000 |
| H  | -1.360331000 | 1.566341000  | 16.579547000 |
| C  | 0.118100000  | 1.221894000  | 15.050800000 |
| H  | -0.617791000 | 1.183007000  | 14.247700000 |
| C  | 1.474693000  | 1.092309000  | 14.761278000 |
| H  | 1.799973000  | 0.952693000  | 13.730435000 |
| C  | 2.418377000  | 1.160312000  | 15.785413000 |
| H  | 3.481719000  | 1.074844000  | 15.561691000 |
| C  | 2.006285000  | 1.367281000  | 17.096726000 |
| H  | 2.745181000  | 1.484790000  | 17.889372000 |
| C  | -0.410344000 | 0.425362000  | 19.959007000 |
| C  | -0.897475000 | -0.692251000 | 19.273777000 |
| H  | -0.871221000 | -0.723891000 | 18.183084000 |
| C  | -1.412031000 | -1.768492000 | 19.996397000 |
| H  | -1.792828000 | -2.642289000 | 19.466107000 |
| C  | -1.431944000 | -1.733027000 | 21.392579000 |



|   |              |              |              |
|---|--------------|--------------|--------------|
| H | -1.828915000 | -2.582977000 | 21.950219000 |
| C | -0.920640000 | -0.628021000 | 22.072880000 |
| H | -0.888193000 | -0.598632000 | 23.163057000 |
| C | -0.407232000 | 0.449075000  | 21.358388000 |
| H | 0.031663000  | 1.288880000  | 21.896890000 |
| C | -1.360095000 | 2.905417000  | 18.876870000 |
| C | -1.239475000 | 4.266129000  | 18.563822000 |
| H | -0.258580000 | 4.743318000  | 18.521214000 |
| C | -2.376442000 | 5.028839000  | 18.317463000 |
| H | -2.257258000 | 6.085646000  | 18.080692000 |
| C | -3.641020000 | 4.436229000  | 18.375293000 |
| H | -4.535322000 | 5.036199000  | 18.193088000 |
| C | -3.762653000 | 3.082677000  | 18.674926000 |
| H | -4.748610000 | 2.617729000  | 18.723214000 |
| C | -2.628919000 | 2.316156000  | 18.939205000 |
| H | -2.738244000 | 1.264647000  | 19.199677000 |
| C | -2.619993000 | 6.687770000  | 22.029414000 |
| C | -2.088465000 | 7.224519000  | 20.850790000 |
| H | -1.319520000 | 6.684514000  | 20.301315000 |
| C | -2.522854000 | 8.459809000  | 20.380669000 |
| H | -2.087874000 | 8.854153000  | 19.461905000 |
| C | -3.491303000 | 9.168651000  | 21.088334000 |
| H | -3.823718000 | 10.144194000 | 20.729444000 |
| C | -4.029190000 | 8.634627000  | 22.260114000 |
| H | -4.784568000 | 9.187941000  | 22.816752000 |
| C | -3.593960000 | 7.401699000  | 22.739821000 |
| H | -3.999543000 | 7.012448000  | 23.672976000 |
| C | -2.088548000 | 5.013982000  | 24.374173000 |
| C | -3.312735000 | 4.883571000  | 25.044152000 |
| H | -4.233410000 | 4.736214000  | 24.478336000 |
| C | -3.352935000 | 4.913219000  | 26.436224000 |
| H | -4.309805000 | 4.817540000  | 26.950663000 |
| C | -2.171712000 | 5.042080000  | 27.165676000 |
| H | -2.196560000 | 5.055385000  | 28.256393000 |
| C | -0.949747000 | 5.126402000  | 26.501346000 |
| H | -0.026978000 | 5.189758000  | 27.072169000 |
| C | -0.902832000 | 5.115862000  | 25.111055000 |
| H | 0.058150000  | 5.181850000  | 24.599158000 |
| C | -3.347181000 | 3.846450000  | 22.092358000 |
| C | -4.612627000 | 4.233266000  | 21.648228000 |
| H | -4.841838000 | 5.287821000  | 21.499250000 |
| C | -5.576605000 | 3.257896000  | 21.387828000 |
| H | -6.567075000 | 3.556505000  | 21.049752000 |
| C | -5.272947000 | 1.908299000  | 21.540643000 |
| H | -6.029343000 | 1.151622000  | 21.321613000 |
| C | -3.996990000 | 1.522315000  | 21.954623000 |
| H | -3.738249000 | 0.467311000  | 22.046472000 |
| C | -3.037886000 | 2.488709000  | 22.241212000 |
| H | -2.042723000 | 2.192678000  | 22.581488000 |
| C | 2.747319000  | 5.174732000  | 15.853395000 |
| C | 2.803983000  | 5.789819000  | 14.596756000 |
| H | 3.730997000  | 6.249768000  | 14.245983000 |
| C | 1.657319000  | 5.840992000  | 13.806748000 |
| H | 1.699968000  | 6.323530000  | 12.829759000 |
| C | 0.458327000  | 5.292231000  | 14.268881000 |
| H | -0.439771000 | 5.348786000  | 13.652886000 |

|   |              |              |              |
|---|--------------|--------------|--------------|
| C | 0.398390000  | 4.696929000  | 15.527109000 |
| H | -0.543996000 | 4.300313000  | 15.908075000 |
| C | 1.538918000  | 4.637199000  | 16.316348000 |
| H | 1.498420000  | 4.193077000  | 17.308728000 |
| C | 5.060894000  | 3.502431000  | 16.434926000 |
| C | 5.289030000  | 3.204073000  | 15.085142000 |
| H | 4.939702000  | 3.882315000  | 14.307642000 |
| C | 5.945262000  | 2.027046000  | 14.735403000 |
| H | 6.120843000  | 1.796201000  | 13.682632000 |
| C | 6.365769000  | 1.140079000  | 15.727757000 |
| H | 6.876755000  | 0.217923000  | 15.450344000 |
| C | 6.124923000  | 1.424857000  | 17.073103000 |
| H | 6.451784000  | 0.734020000  | 17.849537000 |
| C | 5.469011000  | 2.600491000  | 17.426774000 |
| H | 5.263553000  | 2.820815000  | 18.478962000 |
| C | 5.278353000  | 6.422827000  | 16.377834000 |
| C | 6.556642000  | 6.271700000  | 15.833220000 |
| H | 6.979301000  | 5.278433000  | 15.677772000 |
| C | 7.288818000  | 7.405096000  | 15.473636000 |
| H | 8.287690000  | 7.286818000  | 15.052056000 |
| C | 6.751906000  | 8.678867000  | 15.650364000 |
| H | 7.336377000  | 9.559560000  | 15.382405000 |
| C | 5.474470000  | 8.830751000  | 16.193847000 |
| H | 5.053349000  | 9.824889000  | 16.353447000 |
| C | 4.745497000  | 7.708162000  | 16.561666000 |
| H | 3.750025000  | 7.815027000  | 16.992957000 |
| C | 4.233938000  | 0.171773000  | 21.420577000 |
| C | 3.812394000  | 0.015282000  | 20.088663000 |
| H | 4.309946000  | 0.570251000  | 19.291411000 |
| C | 2.768091000  | -0.848400000 | 19.785286000 |
| H | 2.437923000  | -0.965795000 | 18.745668000 |
| C | 2.117039000  | -1.531526000 | 20.812565000 |
| H | 1.279477000  | -2.188544000 | 20.574626000 |
| C | 2.502829000  | -1.339366000 | 22.133100000 |
| H | 1.953243000  | -1.821751000 | 22.933364000 |
| C | 3.567144000  | -0.492238000 | 22.446116000 |
| H | 3.847101000  | -0.328201000 | 23.485189000 |
| C | 6.021080000  | 1.159432000  | 23.498063000 |
| C | 5.473392000  | 1.992705000  | 24.482219000 |
| H | 4.794573000  | 2.802177000  | 24.201445000 |
| C | 5.812926000  | 1.799478000  | 25.816864000 |
| H | 5.404876000  | 2.461233000  | 26.578152000 |
| C | 6.681179000  | 0.771124000  | 26.178126000 |
| H | 6.937840000  | 0.625239000  | 27.227924000 |
| C | 7.234524000  | -0.058524000 | 25.198737000 |
| H | 7.922200000  | -0.859299000 | 25.477350000 |
| C | 6.913445000  | 0.137497000  | 23.856592000 |
| H | 7.363224000  | -0.499045000 | 23.089280000 |
| C | 6.944085000  | 0.911073000  | 20.724207000 |
| C | 7.085916000  | -0.399643000 | 20.242041000 |
| H | 6.336551000  | -1.157015000 | 20.483612000 |
| C | 8.179444000  | -0.726107000 | 19.435091000 |
| H | 8.287098000  | -1.746423000 | 19.057355000 |
| C | 9.125249000  | 0.248212000  | 19.107688000 |
| H | 9.976194000  | -0.010025000 | 18.472218000 |
| C | 8.985490000  | 1.552102000  | 19.591686000 |

|   |              |              |              |
|---|--------------|--------------|--------------|
| H | 9.718086000  | 2.318677000  | 19.338659000 |
| C | 7.896247000  | 1.886338000  | 20.394639000 |
| H | 7.780942000  | 2.910546000  | 20.760444000 |
| C | 2.001048000  | 6.596026000  | 27.605106000 |
| C | 1.382711000  | 7.729086000  | 27.059827000 |
| H | 1.697677000  | 8.099088000  | 26.083274000 |
| C | 0.352798000  | 8.356266000  | 27.752809000 |
| H | -0.128506000 | 9.234523000  | 27.326124000 |
| C | -0.090519000 | 7.838210000  | 28.967724000 |
| H | -0.920601000 | 8.315373000  | 29.489291000 |
| C | 0.523481000  | 6.711299000  | 29.512874000 |
| H | 0.180773000  | 6.305223000  | 30.464363000 |
| C | 1.576962000  | 6.093588000  | 28.842315000 |
| H | 2.039720000  | 5.200701000  | 29.263662000 |
| C | 4.846565000  | 6.578936000  | 26.925586000 |
| C | 4.917088000  | 7.842193000  | 27.519535000 |
| H | 4.005341000  | 8.354550000  | 27.830740000 |
| C | 6.162027000  | 8.440686000  | 27.720904000 |
| H | 6.215125000  | 9.427240000  | 28.183946000 |
| C | 7.330886000  | 7.767424000  | 27.369329000 |
| H | 8.303820000  | 8.227470000  | 27.545879000 |
| C | 7.257800000  | 6.503885000  | 26.778921000 |
| H | 8.166204000  | 5.970987000  | 26.505365000 |
| C | 6.021636000  | 5.923190000  | 26.523999000 |
| H | 5.972088000  | 4.948430000  | 26.033592000 |
| C | 3.454884000  | 4.113995000  | 27.422974000 |
| C | 2.676864000  | 3.046707000  | 26.958526000 |
| H | 1.998852000  | 3.173822000  | 26.114694000 |
| C | 2.790535000  | 1.792156000  | 27.550604000 |
| H | 2.204846000  | 0.967554000  | 27.144319000 |
| C | 3.668709000  | 1.602475000  | 28.617177000 |
| H | 3.766202000  | 0.616762000  | 29.074510000 |
| C | 4.436798000  | 2.667915000  | 29.092344000 |
| H | 5.124676000  | 2.520166000  | 29.925764000 |
| C | 4.336425000  | 3.924600000  | 28.497646000 |
| H | 4.949302000  | 4.751549000  | 28.859806000 |
| C | 1.528325000  | 10.175156000 | 24.509899000 |
| C | 1.124031000  | 10.971118000 | 25.586841000 |
| H | 0.076358000  | 11.258367000 | 25.691251000 |
| C | 2.049628000  | 11.354316000 | 26.557410000 |
| H | 1.723658000  | 11.955862000 | 27.406221000 |
| C | 3.376505000  | 10.939554000 | 26.462007000 |
| H | 4.089844000  | 11.215049000 | 27.240158000 |
| C | 3.788175000  | 10.168823000 | 25.376665000 |
| H | 4.822600000  | 9.839391000  | 25.291170000 |
| C | 2.876274000  | 9.793707000  | 24.398714000 |
| H | 3.206784000  | 9.166488000  | 23.570079000 |
| C | 0.214436000  | 10.643987000 | 21.941346000 |
| C | 0.187748000  | 10.154058000 | 20.632958000 |
| H | 0.291889000  | 9.085832000  | 20.442227000 |
| C | 0.031802000  | 11.030397000 | 19.562709000 |
| H | 0.002728000  | 10.627262000 | 18.551672000 |
| C | -0.084266000 | 12.398840000 | 19.793856000 |
| H | -0.194683000 | 13.084918000 | 18.953229000 |
| C | -0.045328000 | 12.894679000 | 21.100195000 |
| H | -0.120487000 | 13.967567000 | 21.278430000 |

|   |              |              |              |
|---|--------------|--------------|--------------|
| C | 0.106975000  | 12.022060000 | 22.173550000 |
| H | 0.173854000  | 12.409969000 | 23.190584000 |
| C | -1.268801000 | 9.548912000  | 24.207710000 |
| C | -2.202361000 | 10.579828000 | 24.055219000 |
| H | -2.039874000 | 11.370520000 | 23.323254000 |
| C | -3.362366000 | 10.580974000 | 24.828601000 |
| H | -4.086584000 | 11.387778000 | 24.708475000 |
| C | -3.606330000 | 9.552295000  | 25.738963000 |
| H | -4.519058000 | 9.557700000  | 26.336935000 |
| C | -2.689592000 | 8.509834000  | 25.872347000 |
| H | -2.871773000 | 7.689941000  | 26.567144000 |
| C | -1.529842000 | 8.505640000  | 25.105577000 |
| H | -0.818440000 | 7.686219000  | 25.206181000 |
| C | 4.371998000  | 11.199239000 | 21.521529000 |
| C | 3.289372000  | 12.082966000 | 21.603109000 |
| H | 2.503792000  | 12.056414000 | 20.847583000 |
| C | 3.223174000  | 12.999165000 | 22.651125000 |
| H | 2.379187000  | 13.686407000 | 22.710968000 |
| C | 4.232413000  | 13.045045000 | 23.609964000 |
| H | 4.171947000  | 13.757103000 | 24.433933000 |
| C | 5.316960000  | 12.170101000 | 23.519313000 |
| H | 6.106409000  | 12.201216000 | 24.269215000 |
| C | 5.384463000  | 11.240070000 | 22.489057000 |
| H | 6.216418000  | 10.539329000 | 22.429343000 |
| C | 3.564456000  | 10.606513000 | 18.796320000 |
| C | 3.892957000  | 11.893901000 | 18.341903000 |
| H | 4.587549000  | 12.521383000 | 18.904188000 |
| C | 3.323385000  | 12.377281000 | 17.168221000 |
| H | 3.581032000  | 13.379592000 | 16.817598000 |
| C | 2.438733000  | 11.579919000 | 16.431929000 |
| H | 2.009940000  | 11.960163000 | 15.503496000 |
| C | 2.106118000  | 10.303980000 | 16.884881000 |
| H | 1.406910000  | 9.664465000  | 16.340473000 |
| C | 2.658897000  | 9.828173000  | 18.069910000 |
| H | 2.367002000  | 8.840933000  | 18.429699000 |
| C | 6.129757000  | 9.751373000  | 19.719040000 |
| C | 6.966663000  | 10.874141000 | 19.657063000 |
| H | 6.636982000  | 11.829959000 | 20.064809000 |
| C | 8.234135000  | 10.763547000 | 19.091779000 |
| H | 8.881635000  | 11.640221000 | 19.043574000 |
| C | 8.672336000  | 9.537459000  | 18.587796000 |
| H | 9.662938000  | 9.453554000  | 18.137724000 |
| C | 7.848887000  | 8.417275000  | 18.665571000 |
| H | 8.186408000  | 7.460151000  | 18.271795000 |
| C | 6.579724000  | 8.520681000  | 19.229859000 |
| H | 5.923918000  | 7.648956000  | 19.269921000 |
| C | 8.042982000  | 5.933755000  | 20.900730000 |
| C | 9.431608000  | 5.960229000  | 20.712623000 |
| H | 10.087430000 | 6.329473000  | 21.502066000 |
| C | 9.981872000  | 5.485277000  | 19.524620000 |
| H | 11.062450000 | 5.515631000  | 19.381682000 |
| C | 9.156678000  | 4.945294000  | 18.537016000 |
| H | 9.588279000  | 4.550477000  | 17.615889000 |
| C | 7.779948000  | 4.891074000  | 18.734783000 |
| H | 7.141654000  | 4.433183000  | 17.983487000 |
| C | 7.220524000  | 5.394125000  | 19.904517000 |

|   |              |              |              |
|---|--------------|--------------|--------------|
| H | 6.139259000  | 5.349898000  | 20.046058000 |
| C | 8.369351000  | 5.506161000  | 23.674627000 |
| C | 8.031518000  | 4.169061000  | 23.904957000 |
| H | 7.135752000  | 3.752492000  | 23.443430000 |
| C | 8.827220000  | 3.381423000  | 24.729169000 |
| H | 8.556529000  | 2.341809000  | 24.903866000 |
| C | 9.966340000  | 3.927236000  | 25.323668000 |
| H | 10.588717000 | 3.311476000  | 25.973769000 |
| C | 10.309871000 | 5.258635000  | 25.087743000 |
| H | 11.198267000 | 5.684815000  | 25.554516000 |
| C | 9.513778000  | 6.053918000  | 24.264664000 |
| H | 9.769850000  | 7.101749000  | 24.105350000 |
| C | 7.765070000  | 8.167026000  | 22.876011000 |
| C | 7.287813000  | 8.659270000  | 24.103136000 |
| H | 6.608885000  | 8.051448000  | 24.704190000 |
| C | 7.699092000  | 9.905739000  | 24.556143000 |
| H | 7.350360000  | 10.264812000 | 25.524841000 |
| C | 8.538459000  | 10.695834000 | 23.766626000 |
| H | 8.848049000  | 11.682822000 | 24.112036000 |
| C | 8.958719000  | 10.232935000 | 22.520302000 |
| H | 9.586869000  | 10.858564000 | 21.885181000 |
| C | 8.587992000  | 8.963856000  | 22.076449000 |
| H | 8.932452000  | 8.605628000  | 21.106910000 |

294

2 S0

|    |              |              |              |
|----|--------------|--------------|--------------|
| Au | 0.006400000  | -0.075300000 | 0.154800000  |
| Au | -2.006300000 | 0.701900000  | 1.817100000  |
| Au | -2.464200000 | -0.265100000 | -1.138100000 |
| Au | -1.676500000 | -2.128600000 | 1.002600000  |
| Au | 0.683900000  | -0.546400000 | 2.836400000  |
| Au | 0.461600000  | 2.270100000  | 1.545300000  |
| Au | -1.133000000 | 2.242600000  | -0.842200000 |
| Au | 0.069100000  | -1.615900000 | -2.065100000 |
| Au | 1.296600000  | -2.399800000 | 0.605900000  |
| Au | 2.643400000  | 0.288500000  | 0.611400000  |
| Au | 1.311800000  | 1.134100000  | -1.877300000 |
| Cl | -4.416000000 | -0.271800000 | -2.484600000 |
| Cl | 1.303500000  | -1.043200000 | 5.112700000  |
| P  | -3.584100000 | 1.472700000  | 3.292600000  |
| P  | 1.078600000  | 4.085900000  | 2.842100000  |
| P  | -2.499300000 | 3.743000000  | -1.947000000 |
| P  | 0.003100000  | -2.951400000 | -3.961400000 |
| P  | 2.487400000  | -4.346400000 | 0.913400000  |
| P  | 4.857800000  | 0.697100000  | 1.134600000  |
| P  | 2.298700000  | 2.099200000  | -3.738600000 |
| C  | -4.420600000 | 3.011200000  | 2.765200000  |
| C  | -3.688200000 | 3.942800000  | 2.013000000  |
| H  | -2.650200000 | 3.725900000  | 1.738600000  |
| C  | -4.301600000 | 5.118500000  | 1.577300000  |
| H  | -3.733600000 | 5.825800000  | 0.972100000  |
| C  | -5.644500000 | 5.367800000  | 1.884400000  |
| H  | -6.129900000 | 6.277000000  | 1.522000000  |
| C  | -6.377700000 | 4.440900000  | 2.634900000  |
| H  | -7.428500000 | 4.628900000  | 2.867900000  |
| C  | -5.769300000 | 3.263200000  | 3.076500000  |
| H  | -6.343800000 | 2.531500000  | 3.648300000  |



|   |              |              |              |
|---|--------------|--------------|--------------|
| C | -2.894300000 | 1.811700000  | 4.953800000  |
| C | -1.714600000 | 1.153000000  | 5.334000000  |
| H | -1.221200000 | 0.468800000  | 4.642700000  |
| C | -1.154100000 | 1.383800000  | 6.589300000  |
| H | -0.239100000 | 0.855300000  | 6.856700000  |
| C | -1.762200000 | 2.285600000  | 7.469400000  |
| H | -1.318900000 | 2.477600000  | 8.447800000  |
| C | -2.934700000 | 2.950400000  | 7.091100000  |
| H | -3.405000000 | 3.661400000  | 7.771400000  |
| C | -3.503600000 | 2.717900000  | 5.836900000  |
| H | -4.405700000 | 3.253300000  | 5.537300000  |
| C | -4.959600000 | 0.281300000  | 3.512600000  |
| C | -5.403200000 | -0.145000000 | 4.772300000  |
| H | -4.905700000 | 0.214700000  | 5.674300000  |
| C | -6.480900000 | -1.030900000 | 4.867600000  |
| H | -6.817300000 | -1.367600000 | 5.849400000  |
| C | -7.127800000 | -1.475600000 | 3.710600000  |
| H | -7.973400000 | -2.161600000 | 3.786900000  |
| C | -6.675500000 | -1.060200000 | 2.451700000  |
| H | -7.159900000 | -1.425400000 | 1.548300000  |
| C | -5.584600000 | -0.198400000 | 2.347300000  |
| H | -5.202100000 | 0.088200000  | 1.363600000  |
| C | 1.930300000  | 5.389300000  | 1.869300000  |
| C | 2.491600000  | 5.058000000  | 0.625600000  |
| H | 2.440900000  | 4.026400000  | 0.265900000  |
| C | 3.109400000  | 6.044200000  | -0.145600000 |
| H | 3.537600000  | 5.779200000  | -1.110400000 |
| C | 3.169900000  | 7.362600000  | 0.312700000  |
| H | 3.640300000  | 8.131000000  | -0.303100000 |
| C | 2.624600000  | 7.695300000  | 1.559100000  |
| H | 2.670700000  | 8.722900000  | 1.923200000  |
| C | 2.004600000  | 6.713900000  | 2.335600000  |
| H | 1.558800000  | 6.975400000  | 3.296400000  |
| C | -0.242400000 | 5.021600000  | 3.712300000  |
| C | -0.372100000 | 5.035100000  | 5.110900000  |
| H | 0.299100000  | 4.444800000  | 5.736900000  |
| C | -1.367100000 | 5.818400000  | 5.708200000  |
| H | -1.462900000 | 5.820000000  | 6.795600000  |
| C | -2.222800000 | 6.599700000  | 4.923200000  |
| H | -2.990100000 | 7.216400000  | 5.394600000  |
| C | -2.098400000 | 6.579600000  | 3.528300000  |
| H | -2.768500000 | 7.174600000  | 2.906100000  |
| C | -1.127400000 | 5.781700000  | 2.925600000  |
| H | -1.048700000 | 5.761300000  | 1.838500000  |
| C | 2.210500000  | 3.595900000  | 4.189000000  |
| C | 1.813600000  | 2.500700000  | 4.975200000  |
| H | 0.935100000  | 1.916800000  | 4.699200000  |
| C | 2.542200000  | 2.162200000  | 6.112600000  |
| H | 2.218300000  | 1.310500000  | 6.710100000  |
| C | 3.698500000  | 2.876000000  | 6.443100000  |
| H | 4.281000000  | 2.592700000  | 7.321400000  |
| C | 4.125200000  | 3.932600000  | 5.631200000  |
| H | 5.041100000  | 4.473900000  | 5.874800000  |
| C | 3.376600000  | 4.305500000  | 4.510700000  |
| H | 3.700000000  | 5.140000000  | 3.887100000  |
| C | -2.275300000 | 3.664500000  | -3.758900000 |

|   |              |              |              |
|---|--------------|--------------|--------------|
| C | -2.747100000 | 2.503500000  | -4.406100000 |
| H | -3.244800000 | 1.715900000  | -3.833500000 |
| C | -2.588700000 | 2.375100000  | -5.785300000 |
| H | -2.959800000 | 1.479700000  | -6.285200000 |
| C | -1.941100000 | 3.376200000  | -6.522300000 |
| H | -1.808200000 | 3.260200000  | -7.599900000 |
| C | -1.456200000 | 4.516000000  | -5.873400000 |
| H | -0.940600000 | 5.295400000  | -6.436800000 |
| C | -1.624100000 | 4.665900000  | -4.490600000 |
| H | -1.246100000 | 5.558000000  | -3.986100000 |
| C | -4.292600000 | 3.434700000  | -1.739900000 |
| C | -4.741100000 | 2.625000000  | -0.689100000 |
| H | -4.015900000 | 2.144400000  | -0.031300000 |
| C | -6.107800000 | 2.417600000  | -0.496900000 |
| H | -6.447700000 | 1.794700000  | 0.330400000  |
| C | -7.033700000 | 3.004400000  | -1.359600000 |
| H | -8.102300000 | 2.838200000  | -1.210000000 |
| C | -6.591200000 | 3.783000000  | -2.434500000 |
| H | -7.310400000 | 4.211500000  | -3.132700000 |
| C | -5.225300000 | 3.994600000  | -2.630500000 |
| H | -4.881000000 | 4.565600000  | -3.492500000 |
| C | -2.192700000 | 5.481800000  | -1.426000000 |
| C | -3.134100000 | 6.511300000  | -1.616000000 |
| H | -4.087600000 | 6.299800000  | -2.100800000 |
| C | -2.868500000 | 7.800600000  | -1.146700000 |
| H | -3.612200000 | 8.591000000  | -1.282200000 |
| C | -1.657700000 | 8.077800000  | -0.498400000 |
| H | -1.455400000 | 9.084600000  | -0.126800000 |
| C | -0.713400000 | 7.057600000  | -0.311500000 |
| H | 0.226100000  | 7.254700000  | 0.207800000  |
| C | -0.986900000 | 5.761900000  | -0.759600000 |
| H | -0.270400000 | 4.953100000  | -0.570300000 |
| C | -1.199100000 | -2.429200000 | -5.250500000 |
| C | -1.053800000 | -2.765400000 | -6.606600000 |
| H | -0.177900000 | -3.320800000 | -6.944900000 |
| C | -2.022800000 | -2.362800000 | -7.531300000 |
| H | -1.903200000 | -2.622200000 | -8.584200000 |
| C | -3.132200000 | -1.616300000 | -7.112100000 |
| H | -3.880100000 | -1.295000000 | -7.840500000 |
| C | -3.273200000 | -1.275400000 | -5.762300000 |
| H | -4.124800000 | -0.693300000 | -5.408100000 |
| C | -2.309100000 | -1.679900000 | -4.836200000 |
| H | -2.431300000 | -1.398200000 | -3.789900000 |
| C | 1.603400000  | -3.085600000 | -4.846300000 |
| C | 2.495700000  | -2.005300000 | -4.752800000 |
| H | 2.229900000  | -1.147300000 | -4.131800000 |
| C | 3.708600000  | -2.033300000 | -5.444800000 |
| H | 4.394000000  | -1.188600000 | -5.365300000 |
| C | 4.038400000  | -3.145300000 | -6.228400000 |
| H | 4.988900000  | -3.171400000 | -6.765200000 |
| C | 3.156800000  | -4.230700000 | -6.312900000 |
| H | 3.420400000  | -5.106400000 | -6.907400000 |
| C | 1.941600000  | -4.205400000 | -5.622000000 |
| H | 1.266300000  | -5.062100000 | -5.666800000 |
| C | -0.466800000 | -4.681100000 | -3.565800000 |
| C | -1.276500000 | -5.465800000 | -4.406800000 |

|   |              |              |              |
|---|--------------|--------------|--------------|
| H | -1.686800000 | -5.043700000 | -5.327900000 |
| C | -1.574900000 | -6.786300000 | -4.056400000 |
| H | -2.214900000 | -7.390400000 | -4.710500000 |
| C | -1.054600000 | -7.330800000 | -2.878200000 |
| H | -1.287200000 | -8.361300000 | -2.606500000 |
| C | -0.250500000 | -6.547900000 | -2.037900000 |
| H | 0.156900000  | -6.963000000 | -1.117100000 |
| C | 0.023600000  | -5.221000000 | -2.365800000 |
| H | 0.616200000  | -4.594300000 | -1.692200000 |
| C | 3.039800000  | -5.092100000 | -0.663800000 |
| C | 3.414900000  | -4.221300000 | -1.702300000 |
| H | 3.298200000  | -3.141000000 | -1.578800000 |
| C | 3.911400000  | -4.739500000 | -2.895800000 |
| H | 4.212100000  | -4.059000000 | -3.692900000 |
| C | 3.998000000  | -6.126000000 | -3.079700000 |
| H | 4.362700000  | -6.525500000 | -4.027800000 |
| C | 3.599900000  | -6.996800000 | -2.059500000 |
| H | 3.651700000  | -8.078500000 | -2.203900000 |
| C | 3.133600000  | -6.482000000 | -0.847000000 |
| H | 2.835300000  | -7.160100000 | -0.044900000 |
| C | 1.624400000  | -5.711400000 | 1.778700000  |
| C | 0.264900000  | -5.945000000 | 1.499700000  |
| H | -0.279400000 | -5.266700000 | 0.839600000  |
| C | -0.391600000 | -7.019100000 | 2.101800000  |
| H | -1.445700000 | -7.194100000 | 1.895700000  |
| C | 0.288800000  | -7.848300000 | 3.003000000  |
| H | -0.234000000 | -8.678800000 | 3.483000000  |
| C | 1.636400000  | -7.604400000 | 3.298000000  |
| H | 2.169200000  | -8.241800000 | 4.005100000  |
| C | 2.305700000  | -6.542400000 | 2.684900000  |
| H | 3.358500000  | -6.352200000 | 2.908900000  |
| C | 4.026600000  | -4.111700000 | 1.866100000  |
| C | 5.211700000  | -4.779600000 | 1.521300000  |
| H | 5.243600000  | -5.406200000 | 0.630700000  |
| C | 6.348800000  | -4.640600000 | 2.319000000  |
| H | 7.272800000  | -5.147000000 | 2.041600000  |
| C | 6.297200000  | -3.852800000 | 3.469200000  |
| H | 7.183600000  | -3.741500000 | 4.095600000  |
| C | 5.114200000  | -3.192600000 | 3.814600000  |
| H | 5.076900000  | -2.572000000 | 4.706300000  |
| C | 3.979900000  | -3.300400000 | 3.010600000  |
| H | 3.066600000  | -2.759700000 | 3.275000000  |
| C | 5.400400000  | 2.428500000  | 0.872200000  |
| C | 5.536300000  | 2.907400000  | -0.443400000 |
| H | 5.341200000  | 2.244000000  | -1.287200000 |
| C | 5.946500000  | 4.221500000  | -0.669300000 |
| H | 6.063700000  | 4.574700000  | -1.695000000 |
| C | 6.196800000  | 5.075800000  | 0.411500000  |
| H | 6.512900000  | 6.105100000  | 0.233400000  |
| C | 6.025500000  | 4.612500000  | 1.720200000  |
| H | 6.206600000  | 5.278200000  | 2.565500000  |
| C | 5.629300000  | 3.291700000  | 1.956500000  |
| H | 5.504800000  | 2.934300000  | 2.980400000  |
| C | 5.996600000  | -0.339800000 | 0.132400000  |
| C | 5.536400000  | -1.606400000 | -0.261700000 |
| H | 4.514000000  | -1.905400000 | -0.020700000 |

|   |              |              |              |
|---|--------------|--------------|--------------|
| C | 6.383000000  | -2.483200000 | -0.940100000 |
| H | 6.014400000  | -3.466100000 | -1.235000000 |
| C | 7.695300000  | -2.098900000 | -1.234300000 |
| H | 8.359300000  | -2.785500000 | -1.761900000 |
| C | 8.154100000  | -0.830900000 | -0.857500000 |
| H | 9.172400000  | -0.523100000 | -1.097000000 |
| C | 7.308600000  | 0.049800000  | -0.179500000 |
| H | 7.661200000  | 1.044800000  | 0.096600000  |
| C | 5.340100000  | 0.339400000  | 2.870900000  |
| C | 6.696300000  | 0.230100000  | 3.231700000  |
| H | 7.476800000  | 0.336000000  | 2.478500000  |
| C | 7.047900000  | -0.025600000 | 4.556900000  |
| H | 8.101300000  | -0.109800000 | 4.829900000  |
| C | 6.051400000  | -0.182300000 | 5.528900000  |
| H | 6.329100000  | -0.398400000 | 6.562500000  |
| C | 4.706200000  | -0.081800000 | 5.169100000  |
| H | 3.914900000  | -0.242300000 | 5.898500000  |
| C | 4.347600000  | 0.187800000  | 3.845400000  |
| H | 3.291100000  | 0.254400000  | 3.579700000  |
| C | 4.119000000  | 1.896400000  | -3.698200000 |
| C | 4.608600000  | 0.638900000  | -3.301900000 |
| H | 3.913900000  | -0.133700000 | -2.968600000 |
| C | 5.978500000  | 0.386600000  | -3.303800000 |
| H | 6.346200000  | -0.590200000 | -2.991500000 |
| C | 6.875200000  | 1.400900000  | -3.659200000 |
| H | 7.949600000  | 1.213000000  | -3.628400000 |
| C | 6.395200000  | 2.660700000  | -4.026600000 |
| H | 7.093000000  | 3.456100000  | -4.291900000 |
| C | 5.018700000  | 2.909500000  | -4.056000000 |
| H | 4.644100000  | 3.890800000  | -4.350100000 |
| C | 1.822500000  | 1.322800000  | -5.322500000 |
| C | 2.732500000  | 1.181100000  | -6.385100000 |
| H | 3.774000000  | 1.487200000  | -6.260700000 |
| C | 2.301400000  | 0.639500000  | -7.598000000 |
| H | 3.011200000  | 0.519200000  | -8.419100000 |
| C | 0.965400000  | 0.248900000  | -7.754800000 |
| H | 0.630000000  | -0.177200000 | -8.702400000 |
| C | 0.061800000  | 0.393700000  | -6.697600000 |
| H | -0.978700000 | 0.092400000  | -6.817000000 |
| C | 0.486400000  | 0.916700000  | -5.476000000 |
| H | -0.220000000 | 1.015900000  | -4.646600000 |
| C | 2.001000000  | 3.886600000  | -4.010900000 |
| C | 2.095400000  | 4.459400000  | -5.290900000 |
| H | 2.322400000  | 3.832200000  | -6.154300000 |
| C | 1.876100000  | 5.828200000  | -5.459900000 |
| H | 1.944300000  | 6.267800000  | -6.454800000 |
| C | 1.566700000  | 6.630200000  | -4.358000000 |
| H | 1.388700000  | 7.698800000  | -4.492000000 |
| C | 1.465800000  | 6.060700000  | -3.085000000 |
| H | 1.214200000  | 6.679900000  | -2.224100000 |
| C | 1.672800000  | 4.690400000  | -2.911000000 |
| H | 1.567200000  | 4.233700000  | -1.924700000 |
| N | -2.507600000 | -4.270800000 | 2.931800000  |
| N | -3.491500000 | -4.488300000 | 0.732800000  |
| C | -2.691300000 | -3.871000000 | 1.643000000  |
| C | -1.457200000 | -3.517300000 | 3.715700000  |

|   |              |              |              |
|---|--------------|--------------|--------------|
| H | -0.741700000 | -3.154400000 | 2.959400000  |
| C | -2.077300000 | -2.316100000 | 4.428200000  |
| H | -1.289300000 | -1.765700000 | 4.950000000  |
| H | -2.830300000 | -2.607400000 | 5.178400000  |
| H | -2.556700000 | -1.646800000 | 3.700600000  |
| C | -3.889100000 | -3.663700000 | -0.463500000 |
| H | -3.098900000 | -2.894200000 | -0.519900000 |
| C | -3.488100000 | -4.931800000 | 3.876400000  |
| H | -3.185000000 | -4.508800000 | 4.840800000  |
| C | -3.312800000 | -6.452900000 | 4.081400000  |
| C | -4.929000000 | -4.447300000 | 3.679400000  |
| H | -4.965800000 | -3.348900000 | 3.720800000  |
| H | -5.371600000 | -4.760200000 | 2.732400000  |
| H | -5.547800000 | -4.856100000 | 4.489300000  |
| H | -3.877500000 | -7.073700000 | 3.372300000  |
| H | -3.673900000 | -6.717100000 | 5.095500000  |
| H | -2.249900000 | -6.720000000 | 4.011600000  |
| C | -3.947300000 | -5.905100000 | 0.828600000  |
| H | -3.729200000 | -6.189700000 | 1.853600000  |
| C | -3.120500000 | -6.840200000 | -0.072600000 |
| C | -5.447100000 | -6.139200000 | 0.584400000  |
| H | -6.085100000 | -5.494100000 | 1.201900000  |
| H | -5.715600000 | -5.977700000 | -0.466400000 |
| H | -5.686200000 | -7.185400000 | 0.831000000  |
| H | -3.476900000 | -6.854900000 | -1.108700000 |
| H | -3.185000000 | -7.869100000 | 0.315600000  |
| H | -2.068400000 | -6.535200000 | -0.096800000 |
| C | -3.854100000 | -4.348200000 | -1.826600000 |
| H | -2.883900000 | -4.827600000 | -2.015000000 |
| H | -4.658400000 | -5.081200000 | -1.982600000 |
| H | -3.984100000 | -3.550600000 | -2.574400000 |
| C | -0.652900000 | -4.401700000 | 4.674400000  |
| H | -1.252000000 | -4.764700000 | 5.530400000  |
| H | -0.215800000 | -5.265200000 | 4.155700000  |
| H | 0.166300000  | -3.784700000 | 5.078900000  |
| C | -5.187200000 | -2.917300000 | -0.171300000 |
| H | -5.363200000 | -2.176000000 | -0.962500000 |
| H | -6.056100000 | -3.589500000 | -0.107300000 |
| H | -5.079800000 | -2.385200000 | 0.780400000  |

294

2 T1

|    |              |              |              |
|----|--------------|--------------|--------------|
| Au | -0.057300000 | -0.099900000 | 0.145300000  |
| Au | -2.068800000 | 0.724400000  | 1.780400000  |
| Au | -2.537100000 | -0.259000000 | -1.139500000 |
| Au | -1.709800000 | -2.069200000 | 1.121600000  |
| Au | 0.639700000  | -0.629900000 | 2.877000000  |
| Au | 0.390800000  | 2.146700000  | 1.692900000  |
| Au | -1.185200000 | 2.147900000  | -0.890000000 |
| Au | 0.017600000  | -1.488100000 | -2.155400000 |
| Au | 1.284900000  | -2.392800000 | 0.591500000  |
| Au | 2.566500000  | 0.252400000  | 0.532100000  |
| Au | 1.238600000  | 1.056200000  | -1.945400000 |
| Cl | -4.478100000 | -0.311900000 | -2.522400000 |
| Cl | 1.159000000  | -0.983100000 | 5.232800000  |
| P  | -3.636300000 | 1.488200000  | 3.245400000  |
| P  | 1.114500000  | 3.930100000  | 2.895300000  |



|   |              |              |              |
|---|--------------|--------------|--------------|
| P | -2.441000000 | 3.738200000  | -1.931300000 |
| P | -0.082300000 | -2.843800000 | -3.997900000 |
| P | 2.462900000  | -4.313000000 | 0.925200000  |
| P | 4.733400000  | 0.731600000  | 1.102500000  |
| P | 2.354700000  | 2.069800000  | -3.674200000 |
| C | -4.603600000 | 2.902100000  | 2.621000000  |
| C | -3.925800000 | 3.867000000  | 1.865800000  |
| H | -2.869600000 | 3.718600000  | 1.636100000  |
| C | -4.613300000 | 4.965200000  | 1.361200000  |
| H | -4.079200000 | 5.707200000  | 0.766500000  |
| C | -5.983900000 | 5.091900000  | 1.581400000  |
| H | -6.528400000 | 5.940400000  | 1.164100000  |
| C | -6.666800000 | 4.121300000  | 2.314600000  |
| H | -7.740900000 | 4.211900000  | 2.474600000  |
| C | -5.979500000 | 3.029100000  | 2.843300000  |
| H | -6.516400000 | 2.270000000  | 3.414500000  |
| C | -2.905800000 | 2.020600000  | 4.828100000  |
| C | -1.768100000 | 1.341500000  | 5.283000000  |
| H | -1.306600000 | 0.567800000  | 4.670700000  |
| C | -1.217300000 | 1.658400000  | 6.520400000  |
| H | -0.338900000 | 1.108300000  | 6.856500000  |
| C | -1.795100000 | 2.658900000  | 7.301700000  |
| H | -1.362300000 | 2.906500000  | 8.272600000  |
| C | -2.915200000 | 3.348800000  | 6.840300000  |
| H | -3.354500000 | 4.142800000  | 7.445000000  |
| C | -3.472900000 | 3.038500000  | 5.601100000  |
| H | -4.337200000 | 3.593100000  | 5.234200000  |
| C | -4.898300000 | 0.244000000  | 3.664300000  |
| C | -5.195700000 | -0.122300000 | 4.981400000  |
| H | -4.659900000 | 0.342000000  | 5.817200000  |
| C | -6.186300000 | -1.076000000 | 5.222500000  |
| H | -6.413400000 | -1.363600000 | 6.249900000  |
| C | -6.887600000 | -1.655400000 | 4.158000000  |
| H | -7.664600000 | -2.397500000 | 4.349100000  |
| C | -6.574800000 | -1.303400000 | 2.844300000  |
| H | -7.100200000 | -1.775700000 | 2.012100000  |
| C | -5.571600000 | -0.372500000 | 2.592400000  |
| H | -5.302600000 | -0.118700000 | 1.565400000  |
| C | 1.928700000  | 5.223800000  | 1.893600000  |
| C | 2.417900000  | 4.907600000  | 0.622400000  |
| H | 2.336300000  | 3.883200000  | 0.248100000  |
| C | 3.003000000  | 5.900000000  | -0.157600000 |
| H | 3.372100000  | 5.656700000  | -1.150000000 |
| C | 3.119600000  | 7.200600000  | 0.329600000  |
| H | 3.577800000  | 7.975000000  | -0.287400000 |
| C | 2.655400000  | 7.513000000  | 1.604400000  |
| H | 2.747800000  | 8.529500000  | 1.987300000  |
| C | 2.049700000  | 6.531300000  | 2.385800000  |
| H | 1.650700000  | 6.781300000  | 3.369100000  |
| C | -0.210700000 | 4.848000000  | 3.765400000  |
| C | -0.197100000 | 5.057600000  | 5.147400000  |
| H | 0.596000000  | 4.635900000  | 5.763700000  |
| C | -1.210100000 | 5.810200000  | 5.739400000  |
| H | -1.193700000 | 5.968200000  | 6.817000000  |
| C | -2.233900000 | 6.349100000  | 4.964900000  |
| H | -3.022100000 | 6.936800000  | 5.436900000  |

|   |              |              |              |
|---|--------------|--------------|--------------|
| C | -2.250100000 | 6.136800000  | 3.586100000  |
| H | -3.050400000 | 6.556400000  | 2.978900000  |
| C | -1.246400000 | 5.385000000  | 2.987300000  |
| H | -1.256600000 | 5.224900000  | 1.909700000  |
| C | 2.264000000  | 3.492600000  | 4.236200000  |
| C | 1.889000000  | 2.416500000  | 5.051400000  |
| H | 1.005800000  | 1.825000000  | 4.810200000  |
| C | 2.648300000  | 2.098200000  | 6.168600000  |
| H | 2.338000000  | 1.260400000  | 6.792500000  |
| C | 3.818000000  | 2.808600000  | 6.444600000  |
| H | 4.434800000  | 2.535300000  | 7.302300000  |
| C | 4.212400000  | 3.854900000  | 5.611300000  |
| H | 5.132700000  | 4.401600000  | 5.821600000  |
| C | 3.429900000  | 4.214200000  | 4.515600000  |
| H | 3.727800000  | 5.046800000  | 3.878600000  |
| C | -2.181000000 | 3.706400000  | -3.732500000 |
| C | -2.629100000 | 2.556800000  | -4.407000000 |
| H | -3.177800000 | 1.779300000  | -3.867500000 |
| C | -2.369500000 | 2.421300000  | -5.763900000 |
| H | -2.722600000 | 1.536500000  | -6.290800000 |
| C | -1.635100000 | 3.396700000  | -6.444300000 |
| H | -1.402200000 | 3.259600000  | -7.501000000 |
| C | -1.198800000 | 4.535000000  | -5.773300000 |
| H | -0.637700000 | 5.303300000  | -6.304300000 |
| C | -1.481100000 | 4.702000000  | -4.417000000 |
| H | -1.154800000 | 5.601900000  | -3.895700000 |
| C | -4.239300000 | 3.453600000  | -1.781800000 |
| C | -4.731600000 | 2.605300000  | -0.787700000 |
| H | -4.037900000 | 2.082800000  | -0.133800000 |
| C | -6.102500000 | 2.418800000  | -0.643500000 |
| H | -6.476700000 | 1.755100000  | 0.136100000  |
| C | -6.986400000 | 3.073200000  | -1.493600000 |
| H | -8.061600000 | 2.927100000  | -1.378900000 |
| C | -6.499700000 | 3.891900000  | -2.515500000 |
| H | -7.190500000 | 4.376500000  | -3.204800000 |
| C | -5.128400000 | 4.072800000  | -2.670700000 |
| H | -4.748800000 | 4.673400000  | -3.499100000 |
| C | -2.114000000 | 5.444700000  | -1.350500000 |
| C | -3.027300000 | 6.496800000  | -1.505100000 |
| H | -3.974600000 | 6.332800000  | -2.016700000 |
| C | -2.749900000 | 7.746500000  | -0.952100000 |
| H | -3.477600000 | 8.553100000  | -1.049500000 |
| C | -1.555900000 | 7.962000000  | -0.264400000 |
| H | -1.346600000 | 8.937900000  | 0.175200000  |
| C | -0.635600000 | 6.925100000  | -0.125100000 |
| H | 0.295900000  | 7.086100000  | 0.418500000  |
| C | -0.921200000 | 5.668900000  | -0.652500000 |
| H | -0.227400000 | 4.840200000  | -0.492900000 |
| C | -1.222800000 | -2.270700000 | -5.310000000 |
| C | -1.058500000 | -2.613600000 | -6.658100000 |
| H | -0.191900000 | -3.191700000 | -6.980200000 |
| C | -1.990600000 | -2.180500000 | -7.598500000 |
| H | -1.857200000 | -2.441600000 | -8.649000000 |
| C | -3.086200000 | -1.408200000 | -7.202400000 |
| H | -3.810500000 | -1.069300000 | -7.944400000 |
| C | -3.248300000 | -1.067800000 | -5.859200000 |

|   |              |              |              |
|---|--------------|--------------|--------------|
| H | -4.101000000 | -0.475900000 | -5.522900000 |
| C | -2.314900000 | -1.490200000 | -4.917800000 |
| H | -2.452000000 | -1.205000000 | -3.875500000 |
| C | 1.523000000  | -3.072400000 | -4.841700000 |
| C | 2.471600000  | -2.049600000 | -4.741700000 |
| H | 2.249800000  | -1.174900000 | -4.129800000 |
| C | 3.683000000  | -2.152700000 | -5.417400000 |
| H | 4.420700000  | -1.353700000 | -5.328800000 |
| C | 3.948500000  | -3.275900000 | -6.202600000 |
| H | 4.896700000  | -3.356900000 | -6.737400000 |
| C | 3.009700000  | -4.305100000 | -6.292500000 |
| H | 3.222500000  | -5.190900000 | -6.892200000 |
| C | 1.801500000  | -4.213500000 | -5.604200000 |
| H | 1.082500000  | -5.033400000 | -5.643600000 |
| C | -0.643300000 | -4.549200000 | -3.647600000 |
| C | -1.607900000 | -5.206200000 | -4.417600000 |
| H | -2.093900000 | -4.694600000 | -5.250200000 |
| C | -1.968600000 | -6.517300000 | -4.102400000 |
| H | -2.728900000 | -7.025100000 | -4.697800000 |
| C | -1.360200000 | -7.174900000 | -3.032500000 |
| H | -1.641100000 | -8.200900000 | -2.792200000 |
| C | -0.404700000 | -6.514600000 | -2.257200000 |
| H | 0.065700000  | -7.020100000 | -1.412500000 |
| C | -0.057900000 | -5.200800000 | -2.549800000 |
| H | 0.665900000  | -4.669400000 | -1.930900000 |
| C | 2.850100000  | -5.108500000 | -0.675400000 |
| C | 3.299600000  | -4.272200000 | -1.710900000 |
| H | 3.326000000  | -3.190200000 | -1.567700000 |
| C | 3.672000000  | -4.822200000 | -2.929800000 |
| H | 4.038300000  | -4.173100000 | -3.723300000 |
| C | 3.551600000  | -6.195700000 | -3.145100000 |
| H | 3.815000000  | -6.615500000 | -4.116800000 |
| C | 3.086100000  | -7.024600000 | -2.126800000 |
| H | 2.985300000  | -8.097300000 | -2.296000000 |
| C | 2.753800000  | -6.486200000 | -0.882800000 |
| H | 2.416700000  | -7.139500000 | -0.075900000 |
| C | 1.665700000  | -5.629800000 | 1.897800000  |
| C | 0.341200000  | -5.968900000 | 1.577500000  |
| H | -0.203500000 | -5.380400000 | 0.838100000  |
| C | -0.264000000 | -7.042000000 | 2.220400000  |
| H | -1.280900000 | -7.326700000 | 1.955800000  |
| C | 0.423700000  | -7.757000000 | 3.201200000  |
| H | -0.063900000 | -8.594600000 | 3.702400000  |
| C | 1.723400000  | -7.386200000 | 3.554900000  |
| H | 2.261800000  | -7.933100000 | 4.330900000  |
| C | 2.352600000  | -6.330800000 | 2.895800000  |
| H | 3.377800000  | -6.054000000 | 3.154800000  |
| C | 4.114600000  | -4.059300000 | 1.648700000  |
| C | 5.221300000  | -4.768200000 | 1.169600000  |
| H | 5.100000000  | -5.499900000 | 0.370100000  |
| C | 6.484200000  | -4.517300000 | 1.697700000  |
| H | 7.347300000  | -5.054700000 | 1.307300000  |
| C | 6.642500000  | -3.578000000 | 2.713200000  |
| H | 7.632100000  | -3.371800000 | 3.122500000  |
| C | 5.537100000  | -2.891200000 | 3.205000000  |
| H | 5.663300000  | -2.174100000 | 4.011700000  |

|   |              |              |              |
|---|--------------|--------------|--------------|
| C | 4.271300000  | -3.112900000 | 2.669700000  |
| H | 3.410200000  | -2.548600000 | 3.036600000  |
| C | 5.240200000  | 2.464600000  | 0.848800000  |
| C | 5.427100000  | 2.934700000  | -0.456900000 |
| H | 5.293800000  | 2.255800000  | -1.296600000 |
| C | 5.813100000  | 4.253300000  | -0.670800000 |
| H | 5.974900000  | 4.603100000  | -1.689500000 |
| C | 5.982000000  | 5.119300000  | 0.410700000  |
| H | 6.272700000  | 6.156100000  | 0.241100000  |
| C | 5.757300000  | 4.662300000  | 1.707100000  |
| H | 5.876100000  | 5.341000000  | 2.552000000  |
| C | 5.395500000  | 3.335500000  | 1.933200000  |
| H | 5.239000000  | 2.978300000  | 2.951000000  |
| C | 5.934900000  | -0.278400000 | 0.149600000  |
| C | 5.519200000  | -1.550000000 | -0.268000000 |
| H | 4.492400000  | -1.867800000 | -0.078500000 |
| C | 6.408200000  | -2.399900000 | -0.917100000 |
| H | 6.070300000  | -3.384500000 | -1.243600000 |
| C | 7.721600000  | -1.987900000 | -1.148400000 |
| H | 8.420900000  | -2.654700000 | -1.653700000 |
| C | 8.135100000  | -0.716100000 | -0.747800000 |
| H | 9.155900000  | -0.385300000 | -0.942900000 |
| C | 7.244600000  | 0.143700000  | -0.107600000 |
| H | 7.563200000  | 1.149500000  | 0.173300000  |
| C | 5.196300000  | 0.415400000  | 2.848400000  |
| C | 6.540900000  | 0.440700000  | 3.245000000  |
| H | 7.328500000  | 0.639100000  | 2.519500000  |
| C | 6.876700000  | 0.205400000  | 4.574000000  |
| H | 7.923000000  | 0.233800000  | 4.879000000  |
| C | 5.878400000  | -0.089300000 | 5.506000000  |
| H | 6.147700000  | -0.306000000 | 6.541200000  |
| C | 4.546200000  | -0.132200000 | 5.108000000  |
| H | 3.756200000  | -0.406400000 | 5.805300000  |
| C | 4.200200000  | 0.144700000  | 3.787200000  |
| H | 3.150500000  | 0.117300000  | 3.492300000  |
| C | 4.168400000  | 1.891500000  | -3.613000000 |
| C | 4.653100000  | 0.627200000  | -3.235500000 |
| H | 3.955000000  | -0.156200000 | -2.931000000 |
| C | 6.018100000  | 0.383500000  | -3.208500000 |
| H | 6.382300000  | -0.601700000 | -2.922600000 |
| C | 6.917200000  | 1.408300000  | -3.510700000 |
| H | 7.990300000  | 1.220700000  | -3.457500000 |
| C | 6.441600000  | 2.670300000  | -3.861600000 |
| H | 7.143100000  | 3.472900000  | -4.091400000 |
| C | 5.069500000  | 2.914800000  | -3.926400000 |
| H | 4.700600000  | 3.901100000  | -4.211600000 |
| C | 1.936200000  | 1.255000000  | -5.251800000 |
| C | 2.895700000  | 0.961500000  | -6.227400000 |
| H | 3.946400000  | 1.198100000  | -6.055200000 |
| C | 2.507700000  | 0.337800000  | -7.411500000 |
| H | 3.260000000  | 0.079900000  | -8.158500000 |
| C | 1.165000000  | 0.035100000  | -7.632900000 |
| H | 0.861000000  | -0.462800000 | -8.554000000 |
| C | 0.207500000  | 0.360700000  | -6.673400000 |
| H | -0.843500000 | 0.144800000  | -6.852900000 |
| C | 0.587800000  | 0.949000000  | -5.473800000 |

|   |              |              |              |
|---|--------------|--------------|--------------|
| H | -0.158600000 | 1.172800000  | -4.707900000 |
| C | 2.030000000  | 3.834300000  | -3.990200000 |
| C | 2.234000000  | 4.389400000  | -5.259000000 |
| H | 2.531400000  | 3.750700000  | -6.091600000 |
| C | 2.035200000  | 5.752600000  | -5.456700000 |
| H | 2.200200000  | 6.183800000  | -6.443700000 |
| C | 1.619700000  | 6.559700000  | -4.399200000 |
| H | 1.459200000  | 7.625900000  | -4.561500000 |
| C | 1.385600000  | 6.001700000  | -3.143400000 |
| H | 1.031400000  | 6.626600000  | -2.325100000 |
| C | 1.582700000  | 4.639000000  | -2.938200000 |
| H | 1.377400000  | 4.185300000  | -1.968400000 |
| N | -2.472700000 | -4.259300000 | 3.002500000  |
| N | -3.446200000 | -4.464100000 | 0.808100000  |
| C | -2.667000000 | -3.844500000 | 1.726700000  |
| C | -1.463500000 | -3.477600000 | 3.815000000  |
| H | -0.753100000 | -3.079200000 | 3.072900000  |
| C | -2.147100000 | -2.303000000 | 4.525900000  |
| H | -1.368400000 | -1.699300000 | 5.016800000  |
| H | -2.867900000 | -2.632100000 | 5.306900000  |
| H | -2.689400000 | -1.660300000 | 3.799000000  |
| C | -3.864000000 | -3.643900000 | -0.377000000 |
| H | -3.114800000 | -2.834400000 | -0.397200000 |
| C | -3.438900000 | -4.960800000 | 3.921900000  |
| H | -3.171700000 | -4.533900000 | 4.893600000  |
| C | -3.192700000 | -6.467000000 | 4.102300000  |
| C | -4.880500000 | -4.540700000 | 3.701400000  |
| H | -4.951400000 | -3.448300000 | 3.747300000  |
| H | -5.295100000 | -4.874500000 | 2.747700000  |
| H | -5.494500000 | -4.965500000 | 4.500400000  |
| H | -3.713700000 | -7.099500000 | 3.369600000  |
| H | -3.555900000 | -6.770000000 | 5.099100000  |
| H | -2.115500000 | -6.676800000 | 4.046600000  |
| C | -3.817400000 | -5.902300000 | 0.869100000  |
| H | -3.597000000 | -6.199900000 | 1.889600000  |
| C | -2.935300000 | -6.766100000 | -0.040200000 |
| C | -5.294300000 | -6.194800000 | 0.596700000  |
| H | -5.968500000 | -5.572000000 | 1.197500000  |
| H | -5.544700000 | -6.045600000 | -0.461300000 |
| H | -5.497900000 | -7.249200000 | 0.842700000  |
| H | -3.265400000 | -6.741400000 | -1.086300000 |
| H | -2.978800000 | -7.814200000 | 0.298500000  |
| H | -1.892000000 | -6.425700000 | -0.011800000 |
| C | -3.754400000 | -4.294200000 | -1.745500000 |
| H | -2.754300000 | -4.720900000 | -1.901300000 |
| H | -4.516400000 | -5.063800000 | -1.943800000 |
| H | -3.895500000 | -3.487900000 | -2.484900000 |
| C | -0.643000000 | -4.349700000 | 4.760100000  |
| H | -1.242900000 | -4.813600000 | 5.559000000  |
| H | -0.095200000 | -5.133200000 | 4.216500000  |
| H | 0.097800000  | -3.693600000 | 5.247400000  |
| C | -5.204800000 | -2.970400000 | -0.112800000 |
| H | -5.386000000 | -2.222100000 | -0.896800000 |
| H | -6.040800000 | -3.677600000 | -0.102500000 |
| H | -5.157600000 | -2.456800000 | 0.854600000  |

2 S1

|    |              |              |              |
|----|--------------|--------------|--------------|
| Au | 0.014397000  | -0.124701000 | 0.225601000  |
| Au | -2.294350000 | 0.564912000  | 1.550404000  |
| Au | -2.355896000 | -0.304630000 | -1.321668000 |
| Au | -1.732070000 | -2.147330000 | 0.841903000  |
| Au | 0.888792000  | -0.514441000 | 2.844057000  |
| Au | -0.004789000 | 2.172033000  | 1.938279000  |
| Au | -1.181296000 | 2.210719000  | -0.644063000 |
| Au | 0.182878000  | -1.634067000 | -2.026444000 |
| Au | 1.312082000  | -2.442958000 | 0.555476000  |
| Au | 2.650061000  | 0.190542000  | 0.792135000  |
| Au | 1.268966000  | 1.084367000  | -1.780700000 |
| Cl | -4.511248000 | -0.426251000 | -2.373665000 |
| Cl | 1.396075000  | -1.098135000 | 5.130394000  |
| P  | -3.772344000 | 1.427253000  | 3.059464000  |
| P  | 0.970563000  | 3.881688000  | 3.121573000  |
| P  | -2.306180000 | 3.702424000  | -1.984597000 |
| P  | 0.044259000  | -3.011441000 | -3.869544000 |
| P  | 2.563616000  | -4.319693000 | 0.885173000  |
| P  | 4.856088000  | 0.702510000  | 1.134271000  |
| P  | 2.232578000  | 2.108223000  | -3.575849000 |
| C  | -4.568125000 | 2.978123000  | 2.514891000  |
| C  | -3.810068000 | 3.869807000  | 1.746110000  |
| H  | -2.795033000 | 3.590279000  | 1.457869000  |
| C  | -4.364464000 | 5.066835000  | 1.306378000  |
| H  | -3.771758000 | 5.744711000  | 0.688548000  |
| C  | -5.689321000 | 5.369814000  | 1.615760000  |
| H  | -6.136687000 | 6.293433000  | 1.246005000  |
| C  | -6.452605000 | 4.479837000  | 2.373849000  |
| H  | -7.493145000 | 4.711531000  | 2.604027000  |
| C  | -5.897589000 | 3.284648000  | 2.828423000  |
| H  | -6.502058000 | 2.584451000  | 3.408323000  |
| C  | -2.922844000 | 1.838707000  | 4.620195000  |
| C  | -1.856450000 | 1.026173000  | 5.028208000  |
| H  | -1.518944000 | 0.207885000  | 4.397395000  |
| C  | -1.200732000 | 1.281118000  | 6.227405000  |
| H  | -0.380085000 | 0.626643000  | 6.524839000  |
| C  | -1.580917000 | 2.373861000  | 7.006233000  |
| H  | -1.052675000 | 2.592061000  | 7.935606000  |
| C  | -2.622792000 | 3.200940000  | 6.589154000  |
| H  | -2.905371000 | 4.066387000  | 7.187851000  |
| C  | -3.299462000 | 2.938919000  | 5.399764000  |
| H  | -4.102894000 | 3.598164000  | 5.070599000  |
| C  | -5.156352000 | 0.314954000  | 3.473262000  |
| C  | -5.493407000 | -0.026958000 | 4.785802000  |
| H  | -4.916578000 | 0.375619000  | 5.620426000  |
| C  | -6.568963000 | -0.886126000 | 5.019776000  |
| H  | -6.828312000 | -1.157832000 | 6.043501000  |
| C  | -7.316867000 | -1.381637000 | 3.953830000  |
| H  | -8.165141000 | -2.040977000 | 4.141730000  |
| C  | -6.973056000 | -1.046753000 | 2.641846000  |
| H  | -7.547905000 | -1.445055000 | 1.805785000  |
| C  | -5.882014000 | -0.221415000 | 2.397113000  |
| H  | -5.575806000 | -0.002065000 | 1.371528000  |
| C  | 1.742227000  | 5.167586000  | 2.077076000  |
| C  | 2.286000000  | 4.806590000  | 0.837373000  |

|   |              |             |              |
|---|--------------|-------------|--------------|
| H | 2.258970000  | 3.763093000 | 0.511474000  |
| C | 2.857914000  | 5.784737000 | 0.029287000  |
| H | 3.282260000  | 5.506379000 | -0.932689000 |
| C | 2.888209000  | 7.114814000 | 0.441582000  |
| H | 3.327238000  | 7.874607000 | -0.206941000 |
| C | 2.360082000  | 7.473571000 | 1.681283000  |
| H | 2.383182000  | 8.512624000 | 2.011675000  |
| C | 1.784566000  | 6.503371000 | 2.499497000  |
| H | 1.349646000  | 6.786625000 | 3.459587000  |
| C | -0.250702000 | 4.847823000 | 4.095805000  |
| C | -0.053829000 | 5.203963000 | 5.436902000  |
| H | 0.835405000  | 4.869847000 | 5.974428000  |
| C | -1.002114000 | 5.993489000 | 6.086743000  |
| H | -0.843219000 | 6.271551000 | 7.131250000  |
| C | -2.150058000 | 6.413897000 | 5.416026000  |
| H | -2.892984000 | 7.021542000 | 5.935068000  |
| C | -2.357215000 | 6.043102000 | 4.084812000  |
| H | -3.262539000 | 6.343354000 | 3.557194000  |
| C | -1.406965000 | 5.270832000 | 3.427244000  |
| H | -1.557883000 | 4.989768000 | 2.384158000  |
| C | 2.212847000  | 3.440643000 | 4.375505000  |
| C | 1.875179000  | 2.381003000 | 5.225868000  |
| H | 0.985617000  | 1.787249000 | 5.024749000  |
| C | 2.674216000  | 2.092014000 | 6.323609000  |
| H | 2.390281000  | 1.270657000 | 6.982159000  |
| C | 3.847894000  | 2.814799000 | 6.541651000  |
| H | 4.492933000  | 2.570470000 | 7.386440000  |
| C | 4.215499000  | 3.832662000 | 5.661079000  |
| H | 5.143505000  | 4.382071000 | 5.821971000  |
| C | 3.391657000  | 4.163446000 | 4.586146000  |
| H | 3.657895000  | 4.981785000 | 3.916827000  |
| C | -2.209667000 | 3.411701000 | -3.783621000 |
| C | -2.991425000 | 2.362806000 | -4.298274000 |
| H | -3.660993000 | 1.796739000 | -3.647659000 |
| C | -2.911861000 | 2.046301000 | -5.649530000 |
| H | -3.519598000 | 1.234882000 | -6.044059000 |
| C | -2.056135000 | 2.753530000 | -6.494646000 |
| H | -1.988347000 | 2.491417000 | -7.551025000 |
| C | -1.267760000 | 3.777437000 | -5.979562000 |
| H | -0.584243000 | 4.324372000 | -6.628709000 |
| C | -1.339949000 | 4.108206000 | -4.628314000 |
| H | -0.725434000 | 4.915460000 | -4.239011000 |
| C | -4.115089000 | 3.654715000 | -1.671167000 |
| C | -4.661429000 | 2.652961000 | -0.862819000 |
| H | -4.018763000 | 1.888681000 | -0.427845000 |
| C | -6.028677000 | 2.634325000 | -0.601959000 |
| H | -6.442357000 | 1.856960000 | 0.039958000  |
| C | -6.856241000 | 3.618977000 | -1.136417000 |
| H | -7.924607000 | 3.616161000 | -0.914927000 |
| C | -6.320660000 | 4.606616000 | -1.966737000 |
| H | -6.970411000 | 5.363177000 | -2.408443000 |
| C | -4.956581000 | 4.622519000 | -2.239189000 |
| H | -4.553113000 | 5.389465000 | -2.897054000 |
| C | -1.799588000 | 5.431199000 | -1.643668000 |
| C | -2.082244000 | 6.514499000 | -2.487555000 |
| H | -2.554100000 | 6.350662000 | -3.457092000 |

|   |              |              |              |
|---|--------------|--------------|--------------|
| C | -1.736268000 | 7.805927000  | -2.095667000 |
| H | -1.964282000 | 8.642766000  | -2.748846000 |
| C | -1.109915000 | 8.030517000  | -0.870372000 |
| H | -0.849461000 | 9.045225000  | -0.566344000 |
| C | -0.804313000 | 6.954497000  | -0.038684000 |
| H | -0.294211000 | 7.115700000  | 0.908449000  |
| C | -1.143675000 | 5.661150000  | -0.422622000 |
| H | -0.884155000 | 4.806181000  | 0.218153000  |
| C | -1.182212000 | -2.546225000 | -5.141721000 |
| C | -1.003194000 | -2.807215000 | -6.505682000 |
| H | -0.085457000 | -3.276237000 | -6.862652000 |
| C | -1.992066000 | -2.432835000 | -7.413298000 |
| H | -1.850431000 | -2.630570000 | -8.476626000 |
| C | -3.155302000 | -1.799236000 | -6.968758000 |
| H | -3.921504000 | -1.503801000 | -7.687358000 |
| C | -3.334897000 | -1.544100000 | -5.607921000 |
| H | -4.232496000 | -1.052948000 | -5.229215000 |
| C | -2.350380000 | -1.916099000 | -4.699372000 |
| H | -2.494916000 | -1.697239000 | -3.642383000 |
| C | 1.616564000  | -3.183701000 | -4.789808000 |
| C | 2.460522000  | -2.068548000 | -4.836386000 |
| H | 2.172925000  | -1.160223000 | -4.307117000 |
| C | 3.647841000  | -2.119821000 | -5.558845000 |
| H | 4.302236000  | -1.248389000 | -5.583153000 |
| C | 3.995524000  | -3.286210000 | -6.241702000 |
| H | 4.926473000  | -3.328786000 | -6.808933000 |
| C | 3.160613000  | -4.402316000 | -6.187821000 |
| H | 3.438560000  | -5.318059000 | -6.711217000 |
| C | 1.974781000  | -4.359264000 | -5.456790000 |
| H | 1.337973000  | -5.243434000 | -5.390771000 |
| C | -0.413123000 | -4.736805000 | -3.464308000 |
| C | -1.342870000 | -5.467038000 | -4.211420000 |
| H | -1.885381000 | -4.994699000 | -5.030430000 |
| C | -1.576202000 | -6.807046000 | -3.903976000 |
| H | -2.302861000 | -7.374035000 | -4.486463000 |
| C | -0.881314000 | -7.420340000 | -2.863791000 |
| H | -1.064432000 | -8.469754000 | -2.631392000 |
| C | 0.031933000  | -6.686532000 | -2.106864000 |
| H | 0.556265000  | -7.153967000 | -1.273855000 |
| C | 0.254845000  | -5.344988000 | -2.394221000 |
| H | 0.951016000  | -4.757972000 | -1.797658000 |
| C | 3.164961000  | -5.006720000 | -0.692675000 |
| C | 3.545870000  | -4.097351000 | -1.690877000 |
| H | 3.411887000  | -3.025271000 | -1.532775000 |
| C | 4.054551000  | -4.566513000 | -2.894202000 |
| H | 4.358806000  | -3.857146000 | -3.662893000 |
| C | 4.143996000  | -5.938447000 | -3.128060000 |
| H | 4.513165000  | -6.299905000 | -4.088810000 |
| C | 3.748299000  | -6.844307000 | -2.146404000 |
| H | 3.809788000  | -7.916724000 | -2.333120000 |
| C | 3.273404000  | -6.380989000 | -0.919940000 |
| H | 2.976644000  | -7.088920000 | -0.144244000 |
| C | 1.692123000  | -5.697050000 | 1.695970000  |
| C | 0.351326000  | -5.921361000 | 1.348701000  |
| H | -0.153613000 | -5.231848000 | 0.668904000  |
| C | -0.329624000 | -7.000039000 | 1.902912000  |



|   |              |              |              |
|---|--------------|--------------|--------------|
| H | -1.371107000 | -7.173059000 | 1.643850000  |
| C | 0.307381000  | -7.842351000 | 2.813909000  |
| H | -0.234592000 | -8.681461000 | 3.251550000  |
| C | 1.631584000  | -7.599364000 | 3.182713000  |
| H | 2.126494000  | -8.246148000 | 3.907771000  |
| C | 2.327481000  | -6.529331000 | 2.624730000  |
| H | 3.363246000  | -6.335836000 | 2.909250000  |
| C | 4.087688000  | -4.040632000 | 1.834830000  |
| C | 5.334005000  | -4.497255000 | 1.388919000  |
| H | 5.408114000  | -5.087645000 | 0.475147000  |
| C | 6.485537000  | -4.173232000 | 2.103264000  |
| H | 7.458686000  | -4.500247000 | 1.735941000  |
| C | 6.388922000  | -3.433636000 | 3.279904000  |
| H | 7.288039000  | -3.177024000 | 3.841455000  |
| C | 5.141859000  | -3.007534000 | 3.739294000  |
| H | 5.063195000  | -2.437738000 | 4.661582000  |
| C | 3.991682000  | -3.278511000 | 3.009354000  |
| H | 3.029473000  | -2.884247000 | 3.346098000  |
| C | 5.281804000  | 2.459873000  | 0.893056000  |
| C | 5.387431000  | 2.959364000  | -0.412483000 |
| H | 5.236688000  | 2.293402000  | -1.261363000 |
| C | 5.718008000  | 4.293365000  | -0.618384000 |
| H | 5.820377000  | 4.669139000  | -1.636818000 |
| C | 5.900248000  | 5.146949000  | 0.471242000  |
| H | 6.140614000  | 6.198222000  | 0.308614000  |
| C | 5.752586000  | 4.660519000  | 1.768203000  |
| H | 5.881528000  | 5.329802000  | 2.618734000  |
| C | 5.453927000  | 3.316602000  | 1.986260000  |
| H | 5.361039000  | 2.933480000  | 3.003630000  |
| C | 6.036316000  | -0.226035000 | 0.089404000  |
| C | 5.675127000  | -1.528033000 | -0.279352000 |
| H | 4.695770000  | -1.912716000 | 0.008588000  |
| C | 6.567199000  | -2.328264000 | -0.986668000 |
| H | 6.274578000  | -3.338944000 | -1.273336000 |
| C | 7.828019000  | -1.834305000 | -1.325724000 |
| H | 8.530198000  | -2.462995000 | -1.875812000 |
| C | 8.187577000  | -0.533719000 | -0.968830000 |
| H | 9.170423000  | -0.144328000 | -1.238357000 |
| C | 7.294789000  | 0.274474000  | -0.267526000 |
| H | 7.575559000  | 1.294450000  | 0.000506000  |
| C | 5.408216000  | 0.342999000  | 2.846554000  |
| C | 6.759472000  | 0.106087000  | 3.130438000  |
| H | 7.500350000  | 0.094136000  | 2.331250000  |
| C | 7.160337000  | -0.140585000 | 4.439882000  |
| H | 8.214629000  | -0.320371000 | 4.655372000  |
| C | 6.215240000  | -0.179062000 | 5.465938000  |
| H | 6.528805000  | -0.401208000 | 6.487494000  |
| C | 4.868929000  | 0.030254000  | 5.178625000  |
| H | 4.110715000  | -0.064805000 | 5.953370000  |
| C | 4.462289000  | 0.306739000  | 3.875784000  |
| H | 3.404589000  | 0.463421000  | 3.667459000  |
| C | 4.045504000  | 1.919758000  | -3.600843000 |
| C | 4.544484000  | 0.645415000  | -3.284128000 |
| H | 3.859091000  | -0.153367000 | -2.993270000 |
| C | 5.911395000  | 0.408776000  | -3.312376000 |
| H | 6.290939000  | -0.581487000 | -3.064057000 |

|   |              |              |              |
|---|--------------|--------------|--------------|
| C | 6.794081000  | 1.445845000  | -3.621421000 |
| H | 7.869018000  | 1.262713000  | -3.613881000 |
| C | 6.303157000  | 2.714943000  | -3.920708000 |
| H | 6.992848000  | 3.526885000  | -4.155114000 |
| C | 4.928155000  | 2.955598000  | -3.918908000 |
| H | 4.546454000  | 3.950198000  | -4.155147000 |
| C | 1.709228000  | 1.297360000  | -5.120465000 |
| C | 2.603240000  | 1.070164000  | -6.175661000 |
| H | 3.646783000  | 1.377582000  | -6.088533000 |
| C | 2.161418000  | 0.418006000  | -7.324861000 |
| H | 2.861232000  | 0.219644000  | -8.137022000 |
| C | 0.832339000  | 0.007570000  | -7.425944000 |
| H | 0.487440000  | -0.514626000 | -8.319462000 |
| C | -0.058573000 | 0.253489000  | -6.382898000 |
| H | -1.100553000 | -0.047790000 | -6.466100000 |
| C | 0.373456000  | 0.884802000  | -5.223034000 |
| H | -0.327004000 | 1.054605000  | -4.400796000 |
| C | 1.899934000  | 3.882186000  | -3.815121000 |
| C | 2.024767000  | 4.478314000  | -5.076745000 |
| H | 2.289416000  | 3.871578000  | -5.943903000 |
| C | 1.776622000  | 5.839673000  | -5.223400000 |
| H | 1.864203000  | 6.303513000  | -6.206424000 |
| C | 1.407956000  | 6.607328000  | -4.116210000 |
| H | 1.204471000  | 7.672670000  | -4.233379000 |
| C | 1.271611000  | 6.011641000  | -2.865180000 |
| H | 0.965721000  | 6.603950000  | -2.003088000 |
| C | 1.503383000  | 4.646519000  | -2.713844000 |
| H | 1.343483000  | 4.166748000  | -1.746421000 |
| N | -2.582651000 | -4.214325000 | 2.816221000  |
| N | -3.646646000 | -4.355849000 | 0.693963000  |
| C | -2.775982000 | -3.765295000 | 1.554020000  |
| C | -1.459565000 | -3.582378000 | 3.594019000  |
| H | -0.729343000 | -3.266135000 | 2.835901000  |
| C | -1.952191000 | -2.342867000 | 4.334612000  |
| H | -1.081011000 | -1.832045000 | 4.764460000  |
| H | -2.635883000 | -2.583886000 | 5.164117000  |
| H | -2.465624000 | -1.659869000 | 3.642094000  |
| C | -4.211679000 | -3.503986000 | -0.402330000 |
| H | -3.659003000 | -2.559203000 | -0.297377000 |
| C | -3.671937000 | -4.721690000 | 3.722522000  |
| H | -3.357386000 | -4.329753000 | 4.696538000  |
| C | -3.728578000 | -6.242911000 | 3.906139000  |
| C | -5.017922000 | -4.073747000 | 3.433459000  |
| H | -4.915188000 | -2.978017000 | 3.413597000  |
| H | -5.443922000 | -4.394893000 | 2.477936000  |
| H | -5.725760000 | -4.345303000 | 4.231489000  |
| H | -4.351158000 | -6.747394000 | 3.155097000  |
| H | -4.175659000 | -6.459790000 | 4.888879000  |
| H | -2.717969000 | -6.675040000 | 3.892708000  |
| C | -3.774778000 | -5.839316000 | 0.655325000  |
| H | -3.380201000 | -6.166285000 | 1.618140000  |
| C | -2.867002000 | -6.462144000 | -0.414855000 |
| C | -5.207519000 | -6.344238000 | 0.523767000  |
| H | -5.872533000 | -5.930266000 | 1.293934000  |
| H | -5.626556000 | -6.104488000 | -0.463662000 |
| H | -5.205261000 | -7.441435000 | 0.625991000  |

|   |              |              |              |
|---|--------------|--------------|--------------|
| H | -3.305413000 | -6.432566000 | -1.418704000 |
| H | -2.683908000 | -7.520670000 | -0.167148000 |
| H | -1.901682000 | -5.943509000 | -0.456733000 |
| C | -3.946191000 | -3.972316000 | -1.824831000 |
| H | -2.877797000 | -4.166331000 | -1.986932000 |
| H | -4.525372000 | -4.862100000 | -2.104959000 |
| H | -4.246588000 | -3.150900000 | -2.491740000 |
| C | -0.753758000 | -4.557603000 | 4.525455000  |
| H | -1.400770000 | -4.897394000 | 5.349979000  |
| H | -0.372613000 | -5.433262000 | 3.985581000  |
| H | 0.099353000  | -4.023917000 | 4.973058000  |
| C | -5.673685000 | -3.153687000 | -0.138626000 |
| H | -5.955073000 | -2.342589000 | -0.828229000 |
| H | -6.355052000 | -4.003243000 | -0.297661000 |
| H | -5.788945000 | -2.789502000 | 0.891524000  |

278

3 S0

|    |              |              |              |
|----|--------------|--------------|--------------|
| Au | 0.054300000  | 0.064600000  | 0.001100000  |
| Au | -2.046000000 | 0.871000000  | 1.599400000  |
| Au | -2.475000000 | -0.347600000 | -1.144500000 |
| Au | -1.508200000 | -1.984800000 | 1.060800000  |
| Au | 0.560700000  | -0.520500000 | 2.729400000  |
| Au | 0.423400000  | 2.359800000  | 1.453300000  |
| Au | -1.177900000 | 2.233200000  | -1.042000000 |
| Au | 0.035000000  | -1.513500000 | -2.186200000 |
| Au | 1.339000000  | -2.284600000 | 0.316900000  |
| Au | 2.641100000  | 0.414700000  | 0.642900000  |
| Au | 1.449700000  | 1.240500000  | -1.966200000 |
| Cl | -4.650000000 | -0.684500000 | -2.070300000 |
| Cl | 1.009600000  | -1.118300000 | 5.001200000  |
| P  | -3.729000000 | 1.369600000  | 3.050800000  |
| P  | 0.952000000  | 4.133100000  | 2.812000000  |
| P  | -2.499800000 | 3.830800000  | -2.018300000 |
| P  | -0.132500000 | -2.824200000 | -4.078800000 |
| P  | 2.341600000  | -4.317700000 | 0.670800000  |
| P  | 4.838700000  | 0.730400000  | 1.217300000  |
| P  | 2.488400000  | 2.136900000  | -3.814400000 |
| C  | -4.711200000 | 2.853500000  | 2.644500000  |
| C  | -4.093700000 | 3.891400000  | 1.931800000  |
| H  | -3.045100000 | 3.799900000  | 1.638500000  |
| C  | -4.832200000 | 5.019500000  | 1.570400000  |
| H  | -4.350000000 | 5.809400000  | 0.996400000  |
| C  | -6.183400000 | 5.116200000  | 1.912300000  |
| H  | -6.762800000 | 5.991200000  | 1.611200000  |
| C  | -6.802800000 | 4.081200000  | 2.624500000  |
| H  | -7.860700000 | 4.149000000  | 2.884500000  |
| C  | -6.071100000 | 2.948900000  | 2.989500000  |
| H  | -6.556000000 | 2.131300000  | 3.525800000  |
| C  | -3.139500000 | 1.558700000  | 4.771700000  |
| C  | -2.101800000 | 0.713300000  | 5.201000000  |
| H  | -1.682700000 | -0.037200000 | 4.527000000  |
| C  | -1.566600000 | 0.858200000  | 6.480600000  |
| H  | -0.746600000 | 0.205100000  | 6.778700000  |
| C  | -2.059400000 | 1.850400000  | 7.339100000  |
| H  | -1.630300000 | 1.975200000  | 8.336000000  |
| C  | -3.090000000 | 2.694100000  | 6.913900000  |

|   |              |              |              |
|---|--------------|--------------|--------------|
| H | -3.466700000 | 3.476500000  | 7.575200000  |
| C | -3.631300000 | 2.554700000  | 5.630300000  |
| H | -4.415500000 | 3.230800000  | 5.288700000  |
| C | -4.926400000 | -0.018300000 | 3.035500000  |
| C | -5.462900000 | -0.560500000 | 4.212000000  |
| H | -5.175000000 | -0.147800000 | 5.181100000  |
| C | -6.354900000 | -1.636400000 | 4.138900000  |
| H | -6.764400000 | -2.060000000 | 5.058000000  |
| C | -6.722300000 | -2.161000000 | 2.895000000  |
| H | -7.419400000 | -2.999800000 | 2.843100000  |
| C | -6.192900000 | -1.612300000 | 1.718400000  |
| H | -6.472600000 | -2.008900000 | 0.741400000  |
| C | -5.286800000 | -0.555500000 | 1.784100000  |
| H | -4.849900000 | -0.169300000 | 0.859500000  |
| C | 1.924100000  | 5.427900000  | 1.950400000  |
| C | 2.603300000  | 5.090700000  | 0.768600000  |
| H | 2.575800000  | 4.060300000  | 0.402800000  |
| C | 3.302500000  | 6.071700000  | 0.063100000  |
| H | 3.824700000  | 5.802800000  | -0.852700000 |
| C | 3.331000000  | 7.389400000  | 0.529400000  |
| H | 3.870300000  | 8.153400000  | -0.033000000 |
| C | 2.665300000  | 7.727000000  | 1.714000000  |
| H | 2.683600000  | 8.753800000  | 2.081200000  |
| C | 1.961000000  | 6.750600000  | 2.422700000  |
| H | 1.420300000  | 7.015700000  | 3.332300000  |
| C | -0.451200000 | 5.057100000  | 3.549900000  |
| C | -0.675700000 | 5.118000000  | 4.934400000  |
| H | -0.020600000 | 4.586900000  | 5.623800000  |
| C | -1.747600000 | 5.865400000  | 5.434300000  |
| H | -1.921700000 | 5.900600000  | 6.510800000  |
| C | -2.580700000 | 6.572300000  | 4.565000000  |
| H | -3.408200000 | 7.165000000  | 4.958700000  |
| C | -2.355300000 | 6.511600000  | 3.183900000  |
| H | -3.000300000 | 7.055100000  | 2.495400000  |
| C | -1.311900000 | 5.740500000  | 2.674900000  |
| H | -1.157700000 | 5.676000000  | 1.596400000  |
| C | 1.931400000  | 3.571000000  | 4.244800000  |
| C | 1.413600000  | 2.491000000  | 4.981300000  |
| H | 0.511700000  | 1.974700000  | 4.647300000  |
| C | 2.057300000  | 2.076000000  | 6.144800000  |
| H | 1.649700000  | 1.230900000  | 6.697000000  |
| C | 3.235800000  | 2.706400000  | 6.558500000  |
| H | 3.747100000  | 2.367100000  | 7.460300000  |
| C | 3.777700000  | 3.750100000  | 5.801100000  |
| H | 4.709500000  | 4.225900000  | 6.111600000  |
| C | 3.123700000  | 4.191600000  | 4.647500000  |
| H | 3.537600000  | 5.014200000  | 4.062400000  |
| C | -2.275000000 | 3.793800000  | -3.831900000 |
| C | -2.823900000 | 2.683700000  | -4.505000000 |
| H | -3.404100000 | 1.939800000  | -3.950800000 |
| C | -2.618700000 | 2.542600000  | -5.875900000 |
| H | -3.043700000 | 1.683900000  | -6.395100000 |
| C | -1.848700000 | 3.482900000  | -6.577500000 |
| H | -1.678000000 | 3.356300000  | -7.648000000 |
| C | -1.285800000 | 4.568400000  | -5.902900000 |
| H | -0.673500000 | 5.293200000  | -6.442200000 |

|   |              |              |              |
|---|--------------|--------------|--------------|
| C | -1.494700000 | 4.728900000  | -4.527700000 |
| H | -1.046800000 | 5.575100000  | -4.002900000 |
| C | -4.295800000 | 3.585200000  | -1.795700000 |
| C | -4.755200000 | 2.634600000  | -0.873200000 |
| H | -4.040300000 | 2.034200000  | -0.310100000 |
| C | -6.125400000 | 2.438200000  | -0.689000000 |
| H | -6.469100000 | 1.684300000  | 0.020900000  |
| C | -7.041000000 | 3.201500000  | -1.415200000 |
| H | -8.112100000 | 3.054700000  | -1.266300000 |
| C | -6.588900000 | 4.142300000  | -2.354600000 |
| H | -7.304100000 | 4.722300000  | -2.940400000 |
| C | -5.220800000 | 4.325200000  | -2.558200000 |
| H | -4.867700000 | 5.024000000  | -3.320400000 |
| C | -2.094900000 | 5.516000000  | -1.408500000 |
| C | -3.057000000 | 6.518900000  | -1.207900000 |
| H | -4.099900000 | 6.336600000  | -1.466000000 |
| C | -2.686100000 | 7.743200000  | -0.644400000 |
| H | -3.442900000 | 8.510800000  | -0.475600000 |
| C | -1.354300000 | 7.983400000  | -0.291400000 |
| H | -1.071200000 | 8.933000000  | 0.164500000  |
| C | -0.390400000 | 6.991600000  | -0.496600000 |
| H | 0.642100000  | 7.155600000  | -0.187600000 |
| C | -0.760400000 | 5.760200000  | -1.037600000 |
| H | -0.022700000 | 4.962800000  | -1.138500000 |
| C | -1.360900000 | -2.223300000 | -5.303600000 |
| C | -1.262600000 | -2.499400000 | -6.676700000 |
| H | -0.412000000 | -3.059500000 | -7.064200000 |
| C | -2.244200000 | -2.030100000 | -7.552400000 |
| H | -2.159700000 | -2.240900000 | -8.619300000 |
| C | -3.324700000 | -1.284300000 | -7.065600000 |
| H | -4.086600000 | -0.916200000 | -7.754700000 |
| C | -3.426800000 | -1.014500000 | -5.696000000 |
| H | -4.265100000 | -0.446400000 | -5.292000000 |
| C | -2.446400000 | -1.479600000 | -4.819300000 |
| H | -2.538300000 | -1.258800000 | -3.754900000 |
| C | 1.445600000  | -3.008400000 | -4.993400000 |
| C | 2.410800000  | -2.001100000 | -4.850500000 |
| H | 2.205500000  | -1.154700000 | -4.192200000 |
| C | 3.617400000  | -2.081000000 | -5.546200000 |
| H | 4.357600000  | -1.290100000 | -5.427400000 |
| C | 3.869200000  | -3.172000000 | -6.384800000 |
| H | 4.813200000  | -3.235900000 | -6.928100000 |
| C | 2.916400000  | -4.187900000 | -6.517100000 |
| H | 3.118900000  | -5.048100000 | -7.156300000 |
| C | 1.708200000  | -4.111900000 | -5.820500000 |
| H | 0.976000000  | -4.915600000 | -5.904500000 |
| C | -0.652200000 | -4.545800000 | -3.713600000 |
| C | -1.606400000 | -5.237000000 | -4.476300000 |
| H | -2.089700000 | -4.750300000 | -5.325800000 |
| C | -1.948600000 | -6.550700000 | -4.135000000 |
| H | -2.695400000 | -7.082000000 | -4.726900000 |
| C | -1.338900000 | -7.178300000 | -3.041400000 |
| H | -1.609200000 | -8.202900000 | -2.777300000 |
| C | -0.390300000 | -6.487500000 | -2.278500000 |
| H | 0.076800000  | -6.960100000 | -1.413000000 |
| C | -0.056500000 | -5.173900000 | -2.606500000 |

|   |              |              |              |
|---|--------------|--------------|--------------|
| H | 0.660900000  | -4.621900000 | -1.997900000 |
| C | 2.951400000  | -5.095200000 | -0.869900000 |
| C | 3.407800000  | -4.256500000 | -1.900500000 |
| H | 3.354900000  | -3.172400000 | -1.780600000 |
| C | 3.894000000  | -4.808100000 | -3.084800000 |
| H | 4.236200000  | -4.151700000 | -3.884500000 |
| C | 3.906800000  | -6.196100000 | -3.256800000 |
| H | 4.265500000  | -6.622700000 | -4.194800000 |
| C | 3.442100000  | -7.034400000 | -2.238800000 |
| H | 3.441200000  | -8.116400000 | -2.376000000 |
| C | 2.967800000  | -6.487200000 | -1.044100000 |
| H | 2.598500000  | -7.138700000 | -0.250800000 |
| C | 1.182700000  | -5.542400000 | 1.385000000  |
| C | -0.152200000 | -5.516800000 | 0.945400000  |
| H | -0.472800000 | -4.774500000 | 0.214700000  |
| C | -1.076700000 | -6.423200000 | 1.464600000  |
| H | -2.111800000 | -6.381900000 | 1.127400000  |
| C | -0.678100000 | -7.352500000 | 2.433100000  |
| H | -1.403500000 | -8.052900000 | 2.851800000  |
| C | 0.647600000  | -7.375400000 | 2.879200000  |
| H | 0.956500000  | -8.090900000 | 3.642200000  |
| C | 1.580300000  | -6.472400000 | 2.358200000  |
| H | 2.610600000  | -6.480100000 | 2.715500000  |
| C | 3.792400000  | -4.268700000 | 1.777800000  |
| C | 4.899100000  | -5.107100000 | 1.569900000  |
| H | 4.905100000  | -5.808400000 | 0.733200000  |
| C | 5.999200000  | -5.031500000 | 2.428200000  |
| H | 6.862000000  | -5.676900000 | 2.259200000  |
| C | 5.993000000  | -4.124300000 | 3.493900000  |
| H | 6.855800000  | -4.057500000 | 4.159200000  |
| C | 4.889300000  | -3.290900000 | 3.702200000  |
| H | 4.890800000  | -2.574700000 | 4.523500000  |
| C | 3.788400000  | -3.351600000 | 2.845300000  |
| H | 2.937000000  | -2.683600000 | 3.002800000  |
| C | 5.462600000  | 2.418500000  | 0.887400000  |
| C | 5.577700000  | 2.839300000  | -0.451300000 |
| H | 5.310500000  | 2.160500000  | -1.262700000 |
| C | 6.055700000  | 4.116700000  | -0.741400000 |
| H | 6.158700000  | 4.422900000  | -1.784100000 |
| C | 6.397800000  | 4.991800000  | 0.297700000  |
| H | 6.770800000  | 5.991000000  | 0.067900000  |
| C | 6.242300000  | 4.590200000  | 1.628600000  |
| H | 6.488300000  | 5.274900000  | 2.441200000  |
| C | 5.776000000  | 3.306200000  | 1.928300000  |
| H | 5.658200000  | 2.994600000  | 2.968200000  |
| C | 5.959500000  | -0.385600000 | 0.280200000  |
| C | 5.468600000  | -1.650800000 | -0.082500000 |
| H | 4.431800000  | -1.911900000 | 0.142900000  |
| C | 6.301100000  | -2.572300000 | -0.720000000 |
| H | 5.908400000  | -3.553400000 | -0.989300000 |
| C | 7.627300000  | -2.232800000 | -1.009000000 |
| H | 8.277600000  | -2.952500000 | -1.509700000 |
| C | 8.116700000  | -0.967900000 | -0.662200000 |
| H | 9.147300000  | -0.696900000 | -0.894900000 |
| C | 7.287600000  | -0.044500000 | -0.019900000 |
| H | 7.668200000  | 0.945800000  | 0.233500000  |

|   |              |              |              |
|---|--------------|--------------|--------------|
| C | 5.228900000  | 0.396700000  | 2.978400000  |
| C | 6.562000000  | 0.303700000  | 3.419200000  |
| H | 7.383800000  | 0.447700000  | 2.717100000  |
| C | 6.834100000  | 0.014800000  | 4.757000000  |
| H | 7.869700000  | -0.057300000 | 5.094400000  |
| C | 5.781300000  | -0.196400000 | 5.658300000  |
| H | 5.998500000  | -0.440500000 | 6.700500000  |
| C | 4.457700000  | -0.109000000 | 5.219300000  |
| H | 3.623600000  | -0.301000000 | 5.892900000  |
| C | 4.179700000  | 0.196700000  | 3.883900000  |
| H | 3.141300000  | 0.251200000  | 3.552700000  |
| C | 4.289500000  | 1.813000000  | -3.766600000 |
| C | 4.698600000  | 0.546100000  | -3.309700000 |
| H | 3.952600000  | -0.175900000 | -2.971900000 |
| C | 6.053200000  | 0.226800000  | -3.249200000 |
| H | 6.359800000  | -0.752300000 | -2.881400000 |
| C | 7.012500000  | 1.179100000  | -3.613400000 |
| H | 8.072800000  | 0.936800000  | -3.534200000 |
| C | 6.612000000  | 2.443800000  | -4.054200000 |
| H | 7.359300000  | 3.189400000  | -4.328500000 |
| C | 5.252300000  | 2.761700000  | -4.138400000 |
| H | 4.939100000  | 3.748700000  | -4.482200000 |
| C | 1.934300000  | 1.390300000  | -5.384100000 |
| C | 2.817800000  | 1.140300000  | -6.444900000 |
| H | 3.878500000  | 1.370700000  | -6.337700000 |
| C | 2.337500000  | 0.579500000  | -7.630600000 |
| H | 3.026700000  | 0.371600000  | -8.449200000 |
| C | 0.977800000  | 0.279400000  | -7.761400000 |
| H | 0.603400000  | -0.167300000 | -8.684200000 |
| C | 0.097600000  | 0.541800000  | -6.708500000 |
| H | -0.961700000 | 0.312700000  | -6.807100000 |
| C | 0.570800000  | 1.084800000  | -5.514800000 |
| H | -0.117000000 | 1.269800000  | -4.686700000 |
| C | 2.306800000  | 3.941000000  | -4.071900000 |
| C | 2.272600000  | 4.503700000  | -5.356600000 |
| H | 2.360000000  | 3.862200000  | -6.233700000 |
| C | 2.100200000  | 5.881600000  | -5.510300000 |
| H | 2.066700000  | 6.312900000  | -6.511100000 |
| C | 1.958000000  | 6.702600000  | -4.387100000 |
| H | 1.807900000  | 7.776800000  | -4.508200000 |
| C | 1.994800000  | 6.143900000  | -3.106700000 |
| H | 1.872900000  | 6.777400000  | -2.230500000 |
| C | 2.163000000  | 4.767000000  | -2.947500000 |
| H | 2.159500000  | 4.319300000  | -1.953100000 |
| C | -1.905900000 | -3.252400000 | 4.196100000  |
| N | -2.818400000 | -3.773400000 | 3.146500000  |
| N | -3.758200000 | -4.059700000 | 1.209800000  |
| C | -2.786000000 | -3.351900000 | 1.855600000  |
| C | -3.781200000 | -4.754900000 | 3.310000000  |
| H | -3.974100000 | -5.232100000 | 4.260600000  |
| C | -4.377500000 | -4.931300000 | 2.094500000  |
| H | -5.189600000 | -5.583300000 | 1.807300000  |
| C | -4.149300000 | -3.790500000 | -0.205400000 |
| H | -4.303300000 | -2.707400000 | -0.261900000 |
| C | -3.034900000 | -4.161700000 | -1.175800000 |
| H | -2.802800000 | -5.230900000 | -1.137300000 |

|   |              |              |              |
|---|--------------|--------------|--------------|
| H | -2.124900000 | -3.591200000 | -0.959000000 |
| H | -3.341500000 | -3.899900000 | -2.198000000 |
| C | -2.655300000 | -3.027700000 | 5.508400000  |
| H | -2.942700000 | -3.979800000 | 5.983900000  |
| H | -1.988700000 | -2.493600000 | 6.199700000  |
| H | -3.555000000 | -2.416000000 | 5.349300000  |
| H | -1.578200000 | -2.277800000 | 3.809900000  |
| C | -5.456900000 | -4.485800000 | -0.558400000 |
| H | -5.758500000 | -4.154900000 | -1.564600000 |
| H | -5.337700000 | -5.577500000 | -0.582700000 |
| H | -6.266100000 | -4.229600000 | 0.139600000  |
| C | -0.682000000 | -4.147600000 | 4.327800000  |
| H | -0.020400000 | -3.723100000 | 5.091600000  |
| H | -0.964200000 | -5.180700000 | 4.598600000  |
| H | -0.126200000 | -4.174100000 | 3.381300000  |

278

3 T1

|    |              |              |              |
|----|--------------|--------------|--------------|
| Au | -0.060900000 | -0.014300000 | 0.002900000  |
| Au | -2.211300000 | 1.026500000  | 1.380500000  |
| Au | -2.458200000 | -0.572700000 | -1.420800000 |
| Au | -1.507800000 | -2.017500000 | 1.141700000  |
| Au | 0.528800000  | -0.579800000 | 2.841900000  |
| Au | 0.234900000  | 2.366500000  | 1.366300000  |
| Au | -1.187900000 | 2.081300000  | -1.186600000 |
| Au | -0.030000000 | -1.614200000 | -2.160700000 |
| Au | 1.181000000  | -2.352100000 | 0.388300000  |
| Au | 2.404600000  | 0.538700000  | 0.899600000  |
| Au | 1.341600000  | 1.174900000  | -1.941300000 |
| Cl | -4.798600000 | -0.870600000 | -1.563900000 |
| Cl | 0.752900000  | -0.920200000 | 5.216200000  |
| P  | -3.871000000 | 1.401000000  | 2.893100000  |
| P  | 0.973100000  | 4.047800000  | 2.737600000  |
| P  | -2.506600000 | 3.758100000  | -1.987400000 |
| P  | -0.158800000 | -2.783400000 | -4.150900000 |
| P  | 2.300100000  | -4.328900000 | 0.654600000  |
| P  | 4.631900000  | 0.776900000  | 1.347800000  |
| P  | 2.523200000  | 2.082600000  | -3.671500000 |
| C  | -5.078100000 | 2.653500000  | 2.369100000  |
| C  | -4.604600000 | 3.791000000  | 1.697300000  |
| H  | -3.538400000 | 3.877900000  | 1.483200000  |
| C  | -5.498000000 | 4.764500000  | 1.265700000  |
| H  | -5.122000000 | 5.641000000  | 0.738900000  |
| C  | -6.867800000 | 4.592100000  | 1.461100000  |
| H  | -7.566700000 | 5.343300000  | 1.089400000  |
| C  | -7.344200000 | 3.447500000  | 2.102500000  |
| H  | -8.417500000 | 3.306900000  | 2.240700000  |
| C  | -6.454000000 | 2.481600000  | 2.568600000  |
| H  | -6.829400000 | 1.585600000  | 3.067600000  |
| C  | -3.142600000 | 1.935200000  | 4.468000000  |
| C  | -2.153200000 | 1.108500000  | 5.027800000  |
| H  | -1.882200000 | 0.161300000  | 4.554700000  |
| C  | -1.486800000 | 1.513300000  | 6.180600000  |
| H  | -0.709000000 | 0.866300000  | 6.587800000  |
| C  | -1.789500000 | 2.747500000  | 6.767000000  |
| H  | -1.243200000 | 3.074500000  | 7.654700000  |
| C  | -2.781100000 | 3.560300000  | 6.216100000  |



|   |              |              |              |
|---|--------------|--------------|--------------|
| H | -3.023400000 | 4.518600000  | 6.679700000  |
| C | -3.462300000 | 3.162500000  | 5.063600000  |
| H | -4.229300000 | 3.806400000  | 4.627100000  |
| C | -4.829200000 | -0.111100000 | 3.233000000  |
| C | -5.162300000 | -0.522400000 | 4.521600000  |
| H | -4.868000000 | 0.081700000  | 5.382000000  |
| C | -5.865800000 | -1.711200000 | 4.699100000  |
| H | -6.117400000 | -2.036400000 | 5.702600000  |
| C | -6.235300000 | -2.486000000 | 3.600700000  |
| H | -6.775000000 | -3.419700000 | 3.743300000  |
| C | -5.910600000 | -2.067800000 | 2.320000000  |
| H | -6.206000000 | -2.660600000 | 1.456300000  |
| C | -5.195900000 | -0.893900000 | 2.127600000  |
| H | -4.916000000 | -0.599200000 | 1.117500000  |
| C | 1.938400000  | 5.330900000  | 1.856700000  |
| C | 2.602300000  | 4.972600000  | 0.675500000  |
| H | 2.571100000  | 3.935400000  | 0.328300000  |
| C | 3.289200000  | 5.939100000  | -0.053400000 |
| H | 3.782900000  | 5.659800000  | -0.982700000 |
| C | 3.341300000  | 7.257300000  | 0.400700000  |
| H | 3.876000000  | 8.013600000  | -0.176300000 |
| C | 2.706000000  | 7.611100000  | 1.592000000  |
| H | 2.742100000  | 8.641200000  | 1.951300000  |
| C | 1.997900000  | 6.653100000  | 2.316900000  |
| H | 1.463400000  | 6.940600000  | 3.224800000  |
| C | -0.373100000 | 4.996700000  | 3.534900000  |
| C | -0.234500000 | 5.540300000  | 4.822200000  |
| H | 0.651500000  | 5.313600000  | 5.420300000  |
| C | -1.232000000 | 6.369000000  | 5.333300000  |
| H | -1.122700000 | 6.795300000  | 6.334900000  |
| C | -2.372200000 | 6.640500000  | 4.572500000  |
| H | -3.153900000 | 7.285900000  | 4.977700000  |
| C | -2.528600000 | 6.065900000  | 3.304600000  |
| H | -3.434500000 | 6.250600000  | 2.723400000  |
| C | -1.532400000 | 5.244600000  | 2.784000000  |
| H | -1.635300000 | 4.804600000  | 1.787400000  |
| C | 2.037400000  | 3.537500000  | 4.124000000  |
| C | 1.597300000  | 2.457900000  | 4.901200000  |
| H | 0.676500000  | 1.934400000  | 4.644500000  |
| C | 2.348500000  | 2.038800000  | 5.992700000  |
| H | 1.997900000  | 1.183500000  | 6.570400000  |
| C | 3.555500000  | 2.666700000  | 6.295000000  |
| H | 4.165000000  | 2.305800000  | 7.121600000  |
| C | 4.003700000  | 3.730400000  | 5.512800000  |
| H | 4.952700000  | 4.215200000  | 5.740900000  |
| C | 3.243500000  | 4.176400000  | 4.432000000  |
| H | 3.596400000  | 5.007500000  | 3.821400000  |
| C | -2.145300000 | 3.935000000  | -3.766700000 |
| C | -2.516100000 | 2.850800000  | -4.580400000 |
| H | -3.089500000 | 2.027500000  | -4.150300000 |
| C | -2.127100000 | 2.819800000  | -5.913400000 |
| H | -2.417000000 | 1.978300000  | -6.542800000 |
| C | -1.344300000 | 3.849200000  | -6.437400000 |
| H | -1.009400000 | 3.801300000  | -7.473100000 |
| C | -0.981200000 | 4.924100000  | -5.630500000 |
| H | -0.381900000 | 5.735100000  | -6.038800000 |

|   |              |              |              |
|---|--------------|--------------|--------------|
| C | -1.378900000 | 4.975200000  | -4.293700000 |
| H | -1.082800000 | 5.816100000  | -3.663800000 |
| C | -4.305300000 | 3.513500000  | -1.903500000 |
| C | -4.817400000 | 2.490200000  | -1.100700000 |
| H | -4.138700000 | 1.832400000  | -0.560000000 |
| C | -6.192900000 | 2.306100000  | -1.000500000 |
| H | -6.578700000 | 1.495700000  | -0.382300000 |
| C | -7.058000000 | 3.161800000  | -1.677300000 |
| H | -8.136700000 | 3.029900000  | -1.580600000 |
| C | -6.550800000 | 4.172500000  | -2.499800000 |
| H | -7.231100000 | 4.815700000  | -3.059000000 |
| C | -5.175100000 | 4.338200000  | -2.633000000 |
| H | -4.774500000 | 5.086700000  | -3.317800000 |
| C | -2.156200000 | 5.368700000  | -1.184400000 |
| C | -3.136400000 | 6.342000000  | -0.949000000 |
| H | -4.158800000 | 6.182500000  | -1.284800000 |
| C | -2.813300000 | 7.511300000  | -0.261700000 |
| H | -3.590600000 | 8.249100000  | -0.055700000 |
| C | -1.504700000 | 7.741000000  | 0.155500000  |
| H | -1.255100000 | 8.648000000  | 0.702500000  |
| C | -0.518400000 | 6.788500000  | -0.098500000 |
| H | 0.504700000  | 6.959900000  | 0.230000000  |
| C | -0.846800000 | 5.596800000  | -0.736000000 |
| H | -0.096000000 | 4.816200000  | -0.859800000 |
| C | -1.283100000 | -2.059300000 | -5.411700000 |
| C | -1.190100000 | -2.411400000 | -6.765500000 |
| H | -0.409000000 | -3.093000000 | -7.106600000 |
| C | -2.084000000 | -1.871500000 | -7.688100000 |
| H | -2.002300000 | -2.144900000 | -8.741900000 |
| C | -3.071400000 | -0.976400000 | -7.268400000 |
| H | -3.766300000 | -0.549000000 | -7.993700000 |
| C | -3.166600000 | -0.625800000 | -5.920500000 |
| H | -3.942300000 | 0.063100000  | -5.582100000 |
| C | -2.272900000 | -1.159600000 | -4.995800000 |
| H | -2.345700000 | -0.872200000 | -3.941200000 |
| C | 1.416400000  | -3.045500000 | -5.037800000 |
| C | 2.406100000  | -2.065300000 | -4.897700000 |
| H | 2.219300000  | -1.205800000 | -4.252300000 |
| C | 3.613100000  | -2.194700000 | -5.576800000 |
| H | 4.383600000  | -1.432900000 | -5.457900000 |
| C | 3.835300000  | -3.301000000 | -6.399800000 |
| H | 4.783300000  | -3.402500000 | -6.930400000 |
| C | 2.857600000  | -4.287700000 | -6.526500000 |
| H | 3.041700000  | -5.161600000 | -7.151700000 |
| C | 1.651000000  | -4.168400000 | -5.839700000 |
| H | 0.901300000  | -4.957300000 | -5.904100000 |
| C | -0.836200000 | -4.464000000 | -3.877300000 |
| C | -1.956200000 | -4.963900000 | -4.551400000 |
| H | -2.456000000 | -4.368000000 | -5.314900000 |
| C | -2.449000000 | -6.230200000 | -4.230200000 |
| H | -3.329100000 | -6.610900000 | -4.752000000 |
| C | -1.830800000 | -6.997900000 | -3.245100000 |
| H | -2.226900000 | -7.983000000 | -2.995200000 |
| C | -0.715900000 | -6.497200000 | -2.569300000 |
| H | -0.236500000 | -7.078600000 | -1.781600000 |
| C | -0.226900000 | -5.233300000 | -2.876900000 |

|   |              |              |              |
|---|--------------|--------------|--------------|
| H | 0.622600000  | -4.825300000 | -2.328700000 |
| C | 2.693500000  | -5.128700000 | -0.933700000 |
| C | 3.164200000  | -4.311300000 | -1.971400000 |
| H | 3.206300000  | -3.227300000 | -1.833400000 |
| C | 3.536100000  | -4.880000000 | -3.182400000 |
| H | 3.923200000  | -4.247900000 | -3.978600000 |
| C | 3.391000000  | -6.250900000 | -3.383200000 |
| H | 3.654000000  | -6.684200000 | -4.348400000 |
| C | 2.897900000  | -7.060200000 | -2.362600000 |
| H | 2.768300000  | -8.128000000 | -2.528600000 |
| C | 2.562700000  | -6.505400000 | -1.129200000 |
| H | 2.184800000  | -7.136100000 | -0.322500000 |
| C | 1.212100000  | -5.515100000 | 1.500100000  |
| C | -0.111200000 | -5.589100000 | 1.027300000  |
| H | -0.425500000 | -4.967700000 | 0.188900000  |
| C | -1.026500000 | -6.417300000 | 1.662400000  |
| H | -2.058900000 | -6.451000000 | 1.313000000  |
| C | -0.628600000 | -7.179200000 | 2.763900000  |
| H | -1.351600000 | -7.822500000 | 3.266800000  |
| C | 0.684200000  | -7.104600000 | 3.234200000  |
| H | 0.992000000  | -7.692000000 | 4.100600000  |
| C | 1.609300000  | -6.270900000 | 2.607400000  |
| H | 2.630600000  | -6.196300000 | 2.985600000  |
| C | 3.909800000  | -4.260400000 | 1.508100000  |
| C | 4.970700000  | -5.092500000 | 1.124400000  |
| H | 4.813900000  | -5.875000000 | 0.380400000  |
| C | 6.239200000  | -4.888500000 | 1.660500000  |
| H | 7.068000000  | -5.523300000 | 1.344000000  |
| C | 6.451100000  | -3.866600000 | 2.584200000  |
| H | 7.450100000  | -3.694000000 | 2.984700000  |
| C | 5.390900000  | -3.057800000 | 2.991800000  |
| H | 5.563600000  | -2.263800000 | 3.714100000  |
| C | 4.122100000  | -3.242300000 | 2.450700000  |
| H | 3.301300000  | -2.575300000 | 2.727200000  |
| C | 5.322400000  | 2.438200000  | 1.035300000  |
| C | 5.603500000  | 2.825500000  | -0.283300000 |
| H | 5.450200000  | 2.121100000  | -1.101000000 |
| C | 6.102600000  | 4.097700000  | -0.537600000 |
| H | 6.335100000  | 4.385500000  | -1.563200000 |
| C | 6.298700000  | 4.999200000  | 0.511100000  |
| H | 6.680000000  | 5.999800000  | 0.304400000  |
| C | 5.987500000  | 4.625500000  | 1.816600000  |
| H | 6.124100000  | 5.333800000  | 2.634400000  |
| C | 5.503600000  | 3.347100000  | 2.083100000  |
| H | 5.272200000  | 3.051400000  | 3.106100000  |
| C | 5.714800000  | -0.362800000 | 0.395300000  |
| C | 5.157700000  | -1.541600000 | -0.121000000 |
| H | 4.079100000  | -1.705600000 | -0.051600000 |
| C | 5.978700000  | -2.499500000 | -0.712000000 |
| H | 5.546500000  | -3.425700000 | -1.096600000 |
| C | 7.355800000  | -2.284300000 | -0.795500000 |
| H | 7.998600000  | -3.043800000 | -1.244900000 |
| C | 7.908600000  | -1.091600000 | -0.323400000 |
| H | 8.980500000  | -0.906400000 | -0.413400000 |
| C | 7.091800000  | -0.130100000 | 0.268900000  |
| H | 7.524300000  | 0.809700000  | 0.616800000  |

|   |              |              |              |
|---|--------------|--------------|--------------|
| C | 5.033100000  | 0.414700000  | 3.099800000  |
| C | 6.347700000  | 0.509100000  | 3.582400000  |
| H | 7.147600000  | 0.878600000  | 2.940100000  |
| C | 6.628600000  | 0.130600000  | 4.892900000  |
| H | 7.651400000  | 0.206700000  | 5.266200000  |
| C | 5.612100000  | -0.365400000 | 5.717600000  |
| H | 5.851800000  | -0.692300000 | 6.730600000  |
| C | 4.305700000  | -0.448400000 | 5.242800000  |
| H | 3.494500000  | -0.835600000 | 5.863300000  |
| C | 4.016000000  | -0.043700000 | 3.941300000  |
| H | 2.985800000  | -0.103800000 | 3.588000000  |
| C | 4.325700000  | 1.820600000  | -3.540600000 |
| C | 4.748800000  | 0.544600000  | -3.133200000 |
| H | 4.012100000  | -0.218200000 | -2.869500000 |
| C | 6.104200000  | 0.261600000  | -3.028400000 |
| H | 6.424300000  | -0.728700000 | -2.708900000 |
| C | 7.049100000  | 1.256900000  | -3.290700000 |
| H | 8.112500000  | 1.038800000  | -3.178200000 |
| C | 6.633500000  | 2.527400000  | -3.683400000 |
| H | 7.371000000  | 3.304600000  | -3.891100000 |
| C | 5.273000000  | 2.812800000  | -3.815800000 |
| H | 4.949700000  | 3.808200000  | -4.126300000 |
| C | 2.094500000  | 1.328500000  | -5.273500000 |
| C | 3.061900000  | 1.030700000  | -6.239800000 |
| H | 4.115100000  | 1.242600000  | -6.046400000 |
| C | 2.677000000  | 0.432900000  | -7.439300000 |
| H | 3.433100000  | 0.174000000  | -8.181300000 |
| C | 1.331700000  | 0.157200000  | -7.681600000 |
| H | 1.029200000  | -0.320600000 | -8.615600000 |
| C | 0.368200000  | 0.486400000  | -6.729400000 |
| H | -0.682500000 | 0.288100000  | -6.926400000 |
| C | 0.741600000  | 1.056600000  | -5.518100000 |
| H | -0.010200000 | 1.278800000  | -4.757300000 |
| C | 2.275500000  | 3.871800000  | -3.934200000 |
| C | 2.462600000  | 4.448500000  | -5.198500000 |
| H | 2.731000000  | 3.823800000  | -6.051500000 |
| C | 2.282800000  | 5.818800000  | -5.364200000 |
| H | 2.429700000  | 6.270000000  | -6.345200000 |
| C | 1.900500000  | 6.613500000  | -4.282000000 |
| H | 1.746000000  | 7.686000000  | -4.416000000 |
| C | 1.694300000  | 6.036800000  | -3.029400000 |
| H | 1.379800000  | 6.654100000  | -2.187300000 |
| C | 1.880600000  | 4.668600000  | -2.853300000 |
| H | 1.708900000  | 4.202100000  | -1.882300000 |
| C | -1.860000000 | -3.173200000 | 4.280200000  |
| N | -2.801800000 | -3.736300000 | 3.272000000  |
| N | -3.719900000 | -4.153900000 | 1.351700000  |
| C | -2.797300000 | -3.357900000 | 1.967000000  |
| C | -3.692900000 | -4.772900000 | 3.475000000  |
| H | -3.855400000 | -5.217300000 | 4.449500000  |
| C | -4.276200000 | -5.032200000 | 2.267000000  |
| H | -5.051000000 | -5.742400000 | 2.004000000  |
| C | -4.098600000 | -3.985300000 | -0.079200000 |
| H | -4.281400000 | -2.912800000 | -0.209400000 |
| C | -2.963000000 | -4.399000000 | -0.994500000 |
| H | -2.743500000 | -5.465100000 | -0.887600000 |

|      |              |              |              |
|------|--------------|--------------|--------------|
| H    | -2.060200000 | -3.817600000 | -0.781500000 |
| H    | -3.240700000 | -4.203300000 | -2.041000000 |
| C    | -2.512500000 | -3.039700000 | 5.652100000  |
| H    | -2.698700000 | -4.027500000 | 6.117900000  |
| H    | -1.824700000 | -2.475200000 | 6.310500000  |
| H    | -3.458800000 | -2.488700000 | 5.579500000  |
| H    | -1.626000000 | -2.166000000 | 3.901100000  |
| C    | -5.380300000 | -4.736400000 | -0.398900000 |
| H    | -5.681400000 | -4.481300000 | -1.429600000 |
| H    | -5.235000000 | -5.822500000 | -0.347500000 |
| H    | -6.208200000 | -4.454800000 | 0.266800000  |
| C    | -0.586200000 | -3.996500000 | 4.305000000  |
| H    | 0.142000000  | -3.485200000 | 4.935900000  |
| H    | -0.780900000 | -5.008700000 | 4.696900000  |
| H    | -0.177100000 | -4.086300000 | 3.286300000  |
| 278  |              |              |              |
| 3 S1 |              |              |              |
| Au   | -0.009635000 | 0.020080000  | 0.071557000  |
| Au   | -2.058552000 | 1.507727000  | 1.315540000  |
| Au   | -2.462907000 | -0.558159000 | -1.316815000 |
| Au   | -1.607981000 | -1.784524000 | 1.352528000  |
| Au   | 0.666405000  | -0.636880000 | 2.806093000  |
| Au   | 0.467589000  | 2.529578000  | 1.233464000  |
| Au   | -1.238219000 | 2.019721000  | -1.264088000 |
| Au   | 0.042880000  | -1.576511000 | -2.084810000 |
| Au   | 1.133511000  | -2.364253000 | 0.443935000  |
| Au   | 2.487623000  | 0.495153000  | 1.011633000  |
| Au   | 1.407371000  | 1.347547000  | -1.801304000 |
| Cl   | -4.760504000 | -0.894472000 | -1.876663000 |
| Cl   | 0.818560000  | -0.928483000 | 5.201512000  |
| P    | -3.768234000 | 1.537725000  | 2.807681000  |
| P    | 1.141643000  | 4.197123000  | 2.653764000  |
| P    | -2.518388000 | 3.661047000  | -2.194763000 |
| P    | -0.221751000 | -2.753080000 | -4.048847000 |
| P    | 2.202432000  | -4.368074000 | 0.703543000  |
| P    | 4.726538000  | 0.657288000  | 1.404084000  |
| P    | 2.565197000  | 2.199666000  | -3.568007000 |
| C    | -5.041898000 | 2.752783000  | 2.330088000  |
| C    | -4.637909000 | 3.899654000  | 1.628372000  |
| H    | -3.585768000 | 4.028011000  | 1.369263000  |
| C    | -5.580784000 | 4.835200000  | 1.216662000  |
| H    | -5.255533000 | 5.717126000  | 0.664318000  |
| C    | -6.935251000 | 4.619608000  | 1.470611000  |
| H    | -7.675533000 | 5.340469000  | 1.119432000  |
| C    | -7.343979000 | 3.470251000  | 2.153041000  |
| H    | -8.404326000 | 3.295253000  | 2.341954000  |
| C    | -6.402195000 | 2.538830000  | 2.589579000  |
| H    | -6.724629000 | 1.633746000  | 3.108505000  |
| C    | -3.116795000 | 1.982786000  | 4.442026000  |
| C    | -2.006277000 | 1.261895000  | 4.907369000  |
| H    | -1.593137000 | 0.439322000  | 4.319885000  |
| C    | -1.410929000 | 1.615476000  | 6.112833000  |
| H    | -0.547772000 | 1.047011000  | 6.456885000  |
| C    | -1.908250000 | 2.695107000  | 6.845518000  |
| H    | -1.429366000 | 2.982844000  | 7.783934000  |
| C    | -3.006253000 | 3.413682000  | 6.378712000  |

|   |              |              |              |
|---|--------------|--------------|--------------|
| H | -3.385135000 | 4.260729000  | 6.950307000  |
| C | -3.615004000 | 3.064397000  | 5.174796000  |
| H | -4.463847000 | 3.637710000  | 4.797052000  |
| C | -4.637157000 | -0.047760000 | 2.921330000  |
| C | -4.754413000 | -0.790612000 | 4.101199000  |
| H | -4.310803000 | -0.420396000 | 5.026996000  |
| C | -5.453309000 | -1.997455000 | 4.081668000  |
| H | -5.553771000 | -2.580146000 | 4.997623000  |
| C | -6.052400000 | -2.446732000 | 2.907342000  |
| H | -6.615769000 | -3.380796000 | 2.915640000  |
| C | -5.920402000 | -1.710797000 | 1.728052000  |
| H | -6.366856000 | -2.052388000 | 0.795081000  |
| C | -5.188718000 | -0.530819000 | 1.723865000  |
| H | -5.036769000 | 0.001799000  | 0.783078000  |
| C | 2.009227000  | 5.591997000  | 1.858617000  |
| C | 2.750940000  | 5.332623000  | 0.699717000  |
| H | 2.857328000  | 4.305600000  | 0.340486000  |
| C | 3.346289000  | 6.384279000  | 0.010483000  |
| H | 3.902600000  | 6.181358000  | -0.904111000 |
| C | 3.217996000  | 7.692280000  | 0.478141000  |
| H | 3.678254000  | 8.515497000  | -0.071514000 |
| C | 2.500059000  | 7.951881000  | 1.646242000  |
| H | 2.404012000  | 8.973917000  | 2.015811000  |
| C | 1.890730000  | 6.905252000  | 2.336475000  |
| H | 1.296781000  | 7.111238000  | 3.227738000  |
| C | -0.298913000 | 4.980701000  | 3.481425000  |
| C | -0.247930000 | 5.376107000  | 4.825586000  |
| H | 0.626241000  | 5.140828000  | 5.437472000  |
| C | -1.322958000 | 6.070892000  | 5.381360000  |
| H | -1.281451000 | 6.375971000  | 6.428866000  |
| C | -2.440741000 | 6.375170000  | 4.604259000  |
| H | -3.276220000 | 6.923989000  | 5.042159000  |
| C | -2.502528000 | 5.960228000  | 3.273925000  |
| H | -3.382507000 | 6.191652000  | 2.672086000  |
| C | -1.442721000 | 5.250234000  | 2.716674000  |
| H | -1.490992000 | 4.906931000  | 1.681621000  |
| C | 2.188481000  | 3.666692000  | 4.040811000  |
| C | 1.765412000  | 2.533245000  | 4.749931000  |
| H | 0.887007000  | 1.971333000  | 4.424576000  |
| C | 2.476711000  | 2.121532000  | 5.870248000  |
| H | 2.139232000  | 1.234954000  | 6.403574000  |
| C | 3.630511000  | 2.805883000  | 6.261870000  |
| H | 4.208090000  | 2.456376000  | 7.118689000  |
| C | 4.060664000  | 3.920781000  | 5.545838000  |
| H | 4.965982000  | 4.449672000  | 5.850630000  |
| C | 3.335949000  | 4.363203000  | 4.438940000  |
| H | 3.666781000  | 5.238847000  | 3.879195000  |
| C | -2.159194000 | 3.808737000  | -3.973318000 |
| C | -2.722927000 | 2.838626000  | -4.820123000 |
| H | -3.439677000 | 2.119828000  | -4.415355000 |
| C | -2.360354000 | 2.796831000  | -6.159959000 |
| H | -2.805900000 | 2.046736000  | -6.813455000 |
| C | -1.413099000 | 3.696144000  | -6.659670000 |
| H | -1.115062000 | 3.644956000  | -7.707834000 |
| C | -0.846907000 | 4.650725000  | -5.816796000 |
| H | -0.109941000 | 5.354433000  | -6.203344000 |

|   |              |              |              |
|---|--------------|--------------|--------------|
| C | -1.217545000 | 4.716691000  | -4.472484000 |
| H | -0.770937000 | 5.467160000  | -3.817802000 |
| C | -4.318551000 | 3.416620000  | -2.089593000 |
| C | -4.829328000 | 2.475127000  | -1.191416000 |
| H | -4.146606000 | 1.860775000  | -0.606747000 |
| C | -6.204829000 | 2.314153000  | -1.060222000 |
| H | -6.593584000 | 1.567584000  | -0.367743000 |
| C | -7.072536000 | 3.103059000  | -1.809663000 |
| H | -8.151907000 | 2.982720000  | -1.700533000 |
| C | -6.567992000 | 4.032621000  | -2.722648000 |
| H | -7.248834000 | 4.632070000  | -3.328657000 |
| C | -5.193154000 | 4.183273000  | -2.875623000 |
| H | -4.795602000 | 4.883926000  | -3.613689000 |
| C | -2.165168000 | 5.277864000  | -1.396602000 |
| C | -3.159027000 | 6.244948000  | -1.154030000 |
| H | -4.176693000 | 6.090099000  | -1.511387000 |
| C | -2.859343000 | 7.393152000  | -0.421026000 |
| H | -3.644706000 | 8.128428000  | -0.216512000 |
| C | -1.563753000 | 7.606610000  | 0.042989000  |
| H | -1.333434000 | 8.496799000  | 0.629417000  |
| C | -0.561081000 | 6.663452000  | -0.221867000 |
| H | 0.446681000  | 6.823347000  | 0.154878000  |
| C | -0.866303000 | 5.493386000  | -0.907194000 |
| H | -0.111783000 | 4.712274000  | -1.023907000 |
| C | -1.359639000 | -2.026948000 | -5.296144000 |
| C | -1.217594000 | -2.276914000 | -6.668418000 |
| H | -0.386213000 | -2.878992000 | -7.035899000 |
| C | -2.123875000 | -1.725681000 | -7.570708000 |
| H | -2.006592000 | -1.917386000 | -8.637548000 |
| C | -3.178023000 | -0.935159000 | -7.114367000 |
| H | -3.888931000 | -0.513560000 | -7.827423000 |
| C | -3.325126000 | -0.690556000 | -5.748378000 |
| H | -4.154598000 | -0.090466000 | -5.374934000 |
| C | -2.413821000 | -1.228770000 | -4.843490000 |
| H | -2.525886000 | -1.020923000 | -3.776976000 |
| C | 1.320176000  | -3.076437000 | -4.977481000 |
| C | 2.309435000  | -2.086996000 | -4.948817000 |
| H | 2.143673000  | -1.180800000 | -4.362084000 |
| C | 3.490128000  | -2.261359000 | -5.663743000 |
| H | 4.262342000  | -1.492252000 | -5.629242000 |
| C | 3.688195000  | -3.422834000 | -6.412611000 |
| H | 4.615361000  | -3.560948000 | -6.971841000 |
| C | 2.705975000  | -4.414091000 | -6.433353000 |
| H | 2.861412000  | -5.324154000 | -7.013257000 |
| C | 1.524332000  | -4.247012000 | -5.715034000 |
| H | 0.764873000  | -5.031177000 | -5.715326000 |
| C | -0.927476000 | -4.411160000 | -3.735792000 |
| C | -2.071486000 | -4.889685000 | -4.380725000 |
| H | -2.583844000 | -4.278734000 | -5.125596000 |
| C | -2.568731000 | -6.152690000 | -4.054852000 |
| H | -3.464056000 | -6.522764000 | -4.556090000 |
| C | -1.929901000 | -6.934816000 | -3.095438000 |
| H | -2.327308000 | -7.918793000 | -2.843596000 |
| C | -0.788373000 | -6.456701000 | -2.450009000 |
| H | -0.293382000 | -7.054306000 | -1.684815000 |
| C | -0.294893000 | -5.195292000 | -2.762251000 |

|   |              |              |              |
|---|--------------|--------------|--------------|
| H | 0.580030000  | -4.801716000 | -2.247213000 |
| C | 2.625966000  | -5.135315000 | -0.893463000 |
| C | 3.123845000  | -4.299460000 | -1.905182000 |
| H | 3.185068000  | -3.221238000 | -1.738132000 |
| C | 3.492312000  | -4.844860000 | -3.128743000 |
| H | 3.893623000  | -4.199210000 | -3.908969000 |
| C | 3.319196000  | -6.208545000 | -3.369375000 |
| H | 3.579668000  | -6.622616000 | -4.344615000 |
| C | 2.802283000  | -7.035565000 | -2.375131000 |
| H | 2.655735000  | -8.098693000 | -2.569699000 |
| C | 2.469873000  | -6.504737000 | -1.128377000 |
| H | 2.072437000  | -7.150581000 | -0.343488000 |
| C | 1.134428000  | -5.589302000 | 1.522535000  |
| C | -0.203621000 | -5.637883000 | 1.100656000  |
| H | -0.556672000 | -4.956868000 | 0.326518000  |
| C | -1.080753000 | -6.537350000 | 1.687423000  |
| H | -2.120072000 | -6.563350000 | 1.364560000  |
| C | -0.633859000 | -7.386081000 | 2.703692000  |
| H | -1.326181000 | -8.088351000 | 3.171268000  |
| C | 0.691758000  | -7.328080000 | 3.133613000  |
| H | 1.038542000  | -7.984451000 | 3.933192000  |
| C | 1.582884000  | -6.430135000 | 2.546500000  |
| H | 2.618165000  | -6.376745000 | 2.887633000  |
| C | 3.794687000  | -4.301425000 | 1.585160000  |
| C | 4.875798000  | -5.101314000 | 1.188171000  |
| H | 4.752338000  | -5.836923000 | 0.390121000  |
| C | 6.125321000  | -4.924728000 | 1.779022000  |
| H | 6.970868000  | -5.528531000 | 1.447162000  |
| C | 6.293752000  | -3.965257000 | 2.776512000  |
| H | 7.274800000  | -3.812970000 | 3.227805000  |
| C | 5.212557000  | -3.188479000 | 3.195835000  |
| H | 5.346106000  | -2.452193000 | 3.986024000  |
| C | 3.963683000  | -3.339969000 | 2.595884000  |
| H | 3.130554000  | -2.692632000 | 2.889119000  |
| C | 5.354983000  | 2.347455000  | 1.133337000  |
| C | 5.520191000  | 2.806623000  | -0.183675000 |
| H | 5.347807000  | 2.131702000  | -1.023979000 |
| C | 5.920701000  | 4.117792000  | -0.408547000 |
| H | 6.057852000  | 4.469501000  | -1.432811000 |
| C | 6.135545000  | 4.981632000  | 0.669095000  |
| H | 6.437685000  | 6.014961000  | 0.489524000  |
| C | 5.943794000  | 4.533076000  | 1.974671000  |
| H | 6.102886000  | 5.207950000  | 2.817612000  |
| C | 5.556874000  | 3.215640000  | 2.212211000  |
| H | 5.413259000  | 2.866839000  | 3.236952000  |
| C | 5.787853000  | -0.442142000 | 0.394392000  |
| C | 5.230989000  | -1.646452000 | -0.065392000 |
| H | 4.170242000  | -1.847073000 | 0.098939000  |
| C | 6.030088000  | -2.584492000 | -0.712365000 |
| H | 5.594350000  | -3.524490000 | -1.055844000 |
| C | 7.387951000  | -2.319679000 | -0.913160000 |
| H | 8.017978000  | -3.056844000 | -1.413198000 |
| C | 7.933853000  | -1.102562000 | -0.496954000 |
| H | 8.987780000  | -0.881442000 | -0.678734000 |
| C | 7.137324000  | -0.159764000 | 0.150084000  |
| H | 7.563107000  | 0.799625000  | 0.454032000  |



|   |              |              |              |
|---|--------------|--------------|--------------|
| C | 5.175206000  | 0.250856000  | 3.136012000  |
| C | 6.518541000  | 0.179870000  | 3.537942000  |
| H | 7.320894000  | 0.378902000  | 2.828499000  |
| C | 6.830604000  | -0.165917000 | 4.849680000  |
| H | 7.874626000  | -0.219588000 | 5.159779000  |
| C | 5.812782000  | -0.462792000 | 5.762954000  |
| H | 6.065907000  | -0.756285000 | 6.782521000  |
| C | 4.479731000  | -0.396650000 | 5.364122000  |
| H | 3.671221000  | -0.652071000 | 6.049060000  |
| C | 4.161580000  | -0.024179000 | 4.058867000  |
| H | 3.115073000  | 0.023122000  | 3.761024000  |
| C | 4.352003000  | 1.849979000  | -3.502153000 |
| C | 4.717026000  | 0.535570000  | -3.172038000 |
| H | 3.946875000  | -0.212865000 | -2.971908000 |
| C | 6.056025000  | 0.194901000  | -3.066207000 |
| H | 6.330623000  | -0.826960000 | -2.809212000 |
| C | 7.041870000  | 1.167372000  | -3.251401000 |
| H | 8.092406000  | 0.900470000  | -3.134799000 |
| C | 6.683058000  | 2.474771000  | -3.570629000 |
| H | 7.452304000  | 3.234923000  | -3.714991000 |
| C | 5.337487000  | 2.820195000  | -3.705687000 |
| H | 5.057185000  | 3.845620000  | -3.952520000 |
| C | 2.019525000  | 1.434449000  | -5.129536000 |
| C | 2.926552000  | 1.057376000  | -6.128635000 |
| H | 3.998454000  | 1.210056000  | -5.984671000 |
| C | 2.458454000  | 0.454807000  | -7.293346000 |
| H | 3.165015000  | 0.135144000  | -8.060371000 |
| C | 1.092580000  | 0.239038000  | -7.466821000 |
| H | 0.730004000  | -0.254041000 | -8.369627000 |
| C | 0.189918000  | 0.636551000  | -6.482235000 |
| H | -0.877315000 | 0.473916000  | -6.623280000 |
| C | 0.642288000  | 1.228443000  | -5.308859000 |
| H | -0.067866000 | 1.515503000  | -4.529466000 |
| C | 2.392744000  | 3.997257000  | -3.837954000 |
| C | 2.612938000  | 4.556249000  | -5.101909000 |
| H | 2.885324000  | 3.918282000  | -5.943434000 |
| C | 2.453689000  | 5.927871000  | -5.285270000 |
| H | 2.630564000  | 6.366371000  | -6.267745000 |
| C | 2.050182000  | 6.737714000  | -4.222986000 |
| H | 1.901785000  | 7.808612000  | -4.374732000 |
| C | 1.821282000  | 6.180849000  | -2.968260000 |
| H | 1.490006000  | 6.810734000  | -2.142496000 |
| C | 1.999037000  | 4.812962000  | -2.772819000 |
| H | 1.818804000  | 4.364319000  | -1.796457000 |
| C | -1.750003000 | -3.256207000 | 4.403984000  |
| N | -2.711356000 | -3.752715000 | 3.390624000  |
| N | -3.660463000 | -4.044557000 | 1.469588000  |
| C | -2.778050000 | -3.248315000 | 2.131548000  |
| C | -3.529244000 | -4.857064000 | 3.516151000  |
| H | -3.627668000 | -5.409397000 | 4.441226000  |
| C | -4.135896000 | -5.036245000 | 2.307627000  |
| H | -4.868975000 | -5.767928000 | 1.996739000  |
| C | -4.039544000 | -3.810055000 | 0.054280000  |
| H | -4.183390000 | -2.724715000 | -0.028563000 |
| C | -2.915714000 | -4.219485000 | -0.885508000 |
| H | -2.715356000 | -5.299978000 | -0.818265000 |

|   |              |              |              |
|---|--------------|--------------|--------------|
| H | -1.994776000 | -3.660294000 | -0.664693000 |
| H | -3.205381000 | -3.976759000 | -1.918248000 |
| C | -2.310473000 | -3.375901000 | 5.810879000  |
| H | -2.351633000 | -4.422849000 | 6.149570000  |
| H | -1.641930000 | -2.830779000 | 6.492652000  |
| H | -3.314596000 | -2.934443000 | 5.876162000  |
| H | -1.620419000 | -2.190796000 | 4.165561000  |
| C | -5.344059000 | -4.505335000 | -0.295679000 |
| H | -5.675240000 | -4.128472000 | -1.274234000 |
| H | -5.215007000 | -5.596799000 | -0.377662000 |
| H | -6.134522000 | -4.292463000 | 0.438088000  |
| C | -0.418358000 | -3.973128000 | 4.225047000  |
| H | 0.295612000  | -3.625018000 | 4.982916000  |
| H | -0.553352000 | -5.062386000 | 4.310850000  |
| H | -0.003641000 | -3.740475000 | 3.234630000  |

284

4 S0

|    |              |              |              |
|----|--------------|--------------|--------------|
| Au | -0.012000000 | 0.046800000  | 0.014200000  |
| Au | -2.042600000 | 0.777900000  | 1.672800000  |
| Au | -2.424400000 | -0.353600000 | -1.388300000 |
| Au | -1.644500000 | -1.965900000 | 0.882700000  |
| Au | 0.478600000  | -0.585100000 | 2.689000000  |
| Au | 0.268300000  | 2.502900000  | 1.323900000  |
| Au | -1.261900000 | 2.225200000  | -1.079600000 |
| Au | 0.111400000  | -1.404800000 | -2.315800000 |
| Au | 1.342000000  | -2.269100000 | 0.218600000  |
| Au | 2.578800000  | 0.417800000  | 0.655800000  |
| Au | 1.315000000  | 1.261400000  | -1.963400000 |
| Cl | -4.422500000 | -0.518700000 | -2.670400000 |
| Cl | 0.894900000  | -1.289900000 | 4.959500000  |
| P  | -3.582700000 | 1.481200000  | 3.196800000  |
| P  | 0.984300000  | 4.207100000  | 2.701800000  |
| P  | -2.648700000 | 3.706700000  | -2.159000000 |
| P  | 0.082800000  | -2.766700000 | -4.190100000 |
| P  | 2.236000000  | -4.339300000 | 0.655700000  |
| P  | 4.773000000  | 0.769800000  | 1.261000000  |
| P  | 2.368000000  | 2.214900000  | -3.775300000 |
| C  | -4.515900000 | 2.965800000  | 2.689100000  |
| C  | -3.914800000 | 3.830600000  | 1.761100000  |
| H  | -2.938600000 | 3.572300000  | 1.337700000  |
| C  | -4.572600000 | 4.992700000  | 1.357600000  |
| H  | -4.098600000 | 5.653900000  | 0.631800000  |
| C  | -5.841800000 | 5.288500000  | 1.863900000  |
| H  | -6.363600000 | 6.188600000  | 1.534600000  |
| C  | -6.452500000 | 4.420800000  | 2.776600000  |
| H  | -7.448000000 | 4.644500000  | 3.161500000  |
| C  | -5.793300000 | 3.261400000  | 3.194000000  |
| H  | -6.272000000 | 2.582300000  | 3.900900000  |
| C  | -2.772300000 | 1.883200000  | 4.784800000  |
| C  | -1.847900000 | 0.944400000  | 5.280200000  |
| H  | -1.632100000 | 0.030500000  | 4.724100000  |
| C  | -1.177300000 | 1.191700000  | 6.475300000  |
| H  | -0.448400000 | 0.460700000  | 6.827600000  |
| C  | -1.417900000 | 2.379400000  | 7.180700000  |
| H  | -0.883100000 | 2.579100000  | 8.111100000  |
| C  | -2.329000000 | 3.318000000  | 6.683900000  |

|   |              |              |              |
|---|--------------|--------------|--------------|
| H | -2.504900000 | 4.252200000  | 7.220900000  |
| C | -3.006500000 | 3.077500000  | 5.483300000  |
| H | -3.700100000 | 3.821700000  | 5.086100000  |
| C | -4.775500000 | 0.150300000  | 3.602500000  |
| C | -5.343900000 | 0.046100000  | 4.882600000  |
| H | -5.119000000 | 0.798700000  | 5.640300000  |
| C | -6.158000000 | -1.044700000 | 5.197500000  |
| H | -6.585800000 | -1.128300000 | 6.197300000  |
| C | -6.401900000 | -2.036900000 | 4.241900000  |
| H | -7.017500000 | -2.901400000 | 4.495300000  |
| C | -5.844000000 | -1.932000000 | 2.963300000  |
| H | -6.023000000 | -2.715100000 | 2.226200000  |
| C | -5.031900000 | -0.843900000 | 2.640100000  |
| H | -4.559300000 | -0.784100000 | 1.656300000  |
| C | 1.885400000  | 5.491900000  | 1.748900000  |
| C | 2.451500000  | 5.140400000  | 0.512500000  |
| H | 2.403100000  | 4.103800000  | 0.167300000  |
| C | 3.060600000  | 6.115200000  | -0.279000000 |
| H | 3.484300000  | 5.834500000  | -1.241700000 |
| C | 3.109800000  | 7.443400000  | 0.154200000  |
| H | 3.572100000  | 8.205400000  | -0.475500000 |
| C | 2.563100000  | 7.795600000  | 1.393000000  |
| H | 2.601100000  | 8.830600000  | 1.736000000  |
| C | 1.950600000  | 6.824800000  | 2.190600000  |
| H | 1.500300000  | 7.104500000  | 3.144100000  |
| C | -0.264300000 | 5.162200000  | 3.647100000  |
| C | -0.054500000 | 5.532400000  | 4.985900000  |
| H | 0.845100000  | 5.206300000  | 5.510000000  |
| C | -1.005800000 | 6.312500000  | 5.649000000  |
| H | -0.837100000 | 6.596700000  | 6.688900000  |
| C | -2.171100000 | 6.717200000  | 4.988300000  |
| H | -2.918000000 | 7.317700000  | 5.511000000  |
| C | -2.385400000 | 6.341100000  | 3.658000000  |
| H | -3.299100000 | 6.634500000  | 3.140500000  |
| C | -1.436000000 | 5.566600000  | 2.990100000  |
| H | -1.601900000 | 5.276100000  | 1.953500000  |
| C | 2.096200000  | 3.574500000  | 4.000100000  |
| C | 1.665700000  | 2.431300000  | 4.692400000  |
| H | 0.755700000  | 1.910400000  | 4.388100000  |
| C | 2.403100000  | 1.961900000  | 5.775700000  |
| H | 2.065100000  | 1.063900000  | 6.289700000  |
| C | 3.579700000  | 2.613900000  | 6.159700000  |
| H | 4.168600000  | 2.229500000  | 6.993300000  |
| C | 4.020100000  | 3.737800000  | 5.456900000  |
| H | 4.947500000  | 4.233400000  | 5.744000000  |
| C | 3.278000000  | 4.225200000  | 4.377200000  |
| H | 3.616400000  | 5.100800000  | 3.824500000  |
| C | -2.419100000 | 3.660400000  | -3.969300000 |
| C | -2.860100000 | 2.500500000  | -4.639000000 |
| H | -3.377300000 | 1.708500000  | -4.089000000 |
| C | -2.630400000 | 2.374100000  | -6.007600000 |
| H | -2.973400000 | 1.480600000  | -6.528500000 |
| C | -1.942700000 | 3.373100000  | -6.708400000 |
| H | -1.750100000 | 3.255200000  | -7.775600000 |
| C | -1.491200000 | 4.512800000  | -6.038400000 |
| H | -0.944500000 | 5.289100000  | -6.575400000 |

|   |              |              |              |
|---|--------------|--------------|--------------|
| C | -1.730700000 | 4.661500000  | -4.668300000 |
| H | -1.374100000 | 5.550000000  | -4.146100000 |
| C | -4.429200000 | 3.358700000  | -1.925000000 |
| C | -4.830700000 | 2.479000000  | -0.911700000 |
| H | -4.081600000 | 1.973900000  | -0.301700000 |
| C | -6.185800000 | 2.228600000  | -0.696800000 |
| H | -6.486100000 | 1.541000000  | 0.093200000  |
| C | -7.146300000 | 2.847000000  | -1.499000000 |
| H | -8.206100000 | 2.649000000  | -1.332500000 |
| C | -6.751400000 | 3.702700000  | -2.533900000 |
| H | -7.499200000 | 4.163400000  | -3.179400000 |
| C | -5.397000000 | 3.953100000  | -2.753300000 |
| H | -5.089400000 | 4.585000000  | -3.586600000 |
| C | -2.346400000 | 5.433600000  | -1.600500000 |
| C | -3.172300000 | 6.505300000  | -1.962300000 |
| H | -4.020100000 | 6.338500000  | -2.619000000 |
| C | -2.920900000 | 7.785500000  | -1.463800000 |
| H | -3.571300000 | 8.609900000  | -1.741700000 |
| C | -1.843000000 | 8.010200000  | -0.605600000 |
| H | -1.653800000 | 9.010400000  | -0.213500000 |
| C | -1.013900000 | 6.949900000  | -0.245100000 |
| H | -0.172900000 | 7.107800000  | 0.428400000  |
| C | -1.268200000 | 5.668300000  | -0.737500000 |
| H | -0.628800000 | 4.834800000  | -0.440500000 |
| C | -1.047400000 | -2.242500000 | -5.535300000 |
| C | -0.823700000 | -2.562500000 | -6.883800000 |
| H | 0.084800000  | -3.087800000 | -7.181800000 |
| C | -1.759900000 | -2.185100000 | -7.850100000 |
| H | -1.580400000 | -2.428100000 | -8.898300000 |
| C | -2.921800000 | -1.495400000 | -7.477900000 |
| H | -3.650600000 | -1.206000000 | -8.236900000 |
| C | -3.144200000 | -1.179900000 | -6.133000000 |
| H | -4.044500000 | -0.652500000 | -5.814900000 |
| C | -2.205500000 | -1.543700000 | -5.166400000 |
| H | -2.392100000 | -1.283300000 | -4.124300000 |
| C | 1.734200000  | -2.973500000 | -4.961100000 |
| C | 2.665100000  | -1.934900000 | -4.807400000 |
| H | 2.391400000  | -1.057700000 | -4.217900000 |
| C | 3.921200000  | -2.020900000 | -5.409600000 |
| H | 4.633200000  | -1.204200000 | -5.285000000 |
| C | 4.256100000  | -3.150600000 | -6.165200000 |
| H | 5.238700000  | -3.220900000 | -6.634900000 |
| C | 3.336200000  | -4.197200000 | -6.308400000 |
| H | 3.599900000  | -5.084500000 | -6.886100000 |
| C | 2.078500000  | -4.114400000 | -5.705500000 |
| H | 1.368200000  | -4.937800000 | -5.801200000 |
| C | -0.457700000 | -4.476600000 | -3.806500000 |
| C | -1.486200000 | -5.127700000 | -4.500600000 |
| H | -2.016900000 | -4.614500000 | -5.302000000 |
| C | -1.832900000 | -6.439300000 | -4.158900000 |
| H | -2.638600000 | -6.938500000 | -4.695600000 |
| C | -1.151300000 | -7.107900000 | -3.139500000 |
| H | -1.421900000 | -8.132200000 | -2.878600000 |
| C | -0.125900000 | -6.458100000 | -2.446100000 |
| H | 0.404700000  | -6.964500000 | -1.640800000 |
| C | 0.207800000  | -5.143300000 | -2.766500000 |

|   |              |              |              |
|---|--------------|--------------|--------------|
| H | 0.988800000  | -4.626100000 | -2.211700000 |
| C | 3.150700000  | -5.070800000 | -0.750300000 |
| C | 3.585500000  | -4.216700000 | -1.776700000 |
| H | 3.359000000  | -3.149800000 | -1.724900000 |
| C | 4.267800000  | -4.734700000 | -2.876600000 |
| H | 4.590200000  | -4.064900000 | -3.673400000 |
| C | 4.507100000  | -6.107800000 | -2.965400000 |
| H | 5.024300000  | -6.513600000 | -3.835200000 |
| C | 4.068200000  | -6.965100000 | -1.949600000 |
| H | 4.246900000  | -8.037600000 | -2.022200000 |
| C | 3.393800000  | -6.450200000 | -0.842400000 |
| H | 3.042800000  | -7.119700000 | -0.056000000 |
| C | 1.000300000  | -5.601300000 | 1.152600000  |
| C | -0.309900000 | -5.516500000 | 0.657200000  |
| H | -0.589300000 | -4.693100000 | -0.002300000 |
| C | -1.255800000 | -6.476000000 | 1.023200000  |
| H | -2.273000000 | -6.406700000 | 0.640100000  |
| C | -0.906900000 | -7.510700000 | 1.892700000  |
| H | -1.656700000 | -8.244600000 | 2.188600000  |
| C | 0.396100000  | -7.594000000 | 2.396800000  |
| H | 0.668300000  | -8.391800000 | 3.087100000  |
| C | 1.348900000  | -6.642100000 | 2.031100000  |
| H | 2.356100000  | -6.688800000 | 2.447200000  |
| C | 3.389300000  | -4.298900000 | 2.067400000  |
| C | 4.692800000  | -4.804500000 | 2.017300000  |
| H | 5.073800000  | -5.235500000 | 1.100500000  |
| C | 5.501800000  | -4.751100000 | 3.150700000  |
| H | 6.520400000  | -5.134200000 | 3.108300000  |
| C | 5.006300000  | -4.208600000 | 4.331900000  |
| H | 5.641400000  | -4.168200000 | 5.211800000  |
| C | 3.702500000  | -3.704200000 | 4.384200000  |
| H | 3.305400000  | -3.265700000 | 5.296700000  |
| C | 2.897300000  | -3.734400000 | 3.253500000  |
| H | 1.893700000  | -3.310300000 | 3.294300000  |
| C | 5.359700000  | 2.483500000  | 0.999500000  |
| C | 5.500200000  | 2.949700000  | -0.320200000 |
| H | 5.294700000  | 2.282800000  | -1.158100000 |
| C | 5.920800000  | 4.257600000  | -0.557900000 |
| H | 6.038300000  | 4.601500000  | -1.586100000 |
| C | 6.179900000  | 5.120300000  | 0.513900000  |
| H | 6.501100000  | 6.146100000  | 0.326300000  |
| C | 6.010800000  | 4.668000000  | 1.825400000  |
| H | 6.199200000  | 5.338300000  | 2.665200000  |
| C | 5.601900000  | 3.353600000  | 2.072500000  |
| H | 5.468400000  | 3.005800000  | 3.096700000  |
| C | 5.934200000  | -0.281200000 | 0.295800000  |
| C | 5.499100000  | -1.558100000 | -0.097100000 |
| H | 4.472900000  | -1.869300000 | 0.115400000  |
| C | 6.377200000  | -2.427300000 | -0.747800000 |
| H | 6.031900000  | -3.417700000 | -1.045100000 |
| C | 7.691000000  | -2.026300000 | -1.018300000 |
| H | 8.373900000  | -2.707300000 | -1.529200000 |
| C | 8.124600000  | -0.751600000 | -0.637300000 |
| H | 9.145300000  | -0.432400000 | -0.851800000 |
| C | 7.250800000  | 0.119600000  | 0.018500000  |
| H | 7.587600000  | 1.117500000  | 0.302200000  |

|   |              |              |              |
|---|--------------|--------------|--------------|
| C | 5.173900000  | 0.356400000  | 3.001900000  |
| C | 6.483000000  | 0.498100000  | 3.490300000  |
| H | 7.265700000  | 0.883700000  | 2.842300000  |
| C | 6.780600000  | 0.143500000  | 4.805300000  |
| H | 7.795700000  | 0.255700000  | 5.180500000  |
| C | 5.779500000  | -0.363200000 | 5.638200000  |
| H | 6.016700000  | -0.643400000 | 6.666700000  |
| C | 4.484600000  | -0.509400000 | 5.151700000  |
| H | 3.687700000  | -0.896600000 | 5.781000000  |
| C | 4.178600000  | -0.149600000 | 3.836500000  |
| H | 3.160200000  | -0.269300000 | 3.471000000  |
| C | 4.181700000  | 2.006500000  | -3.657600000 |
| C | 4.639900000  | 0.745200000  | -3.233200000 |
| H | 3.922600000  | -0.019700000 | -2.931100000 |
| C | 6.005300000  | 0.480600000  | -3.164400000 |
| H | 6.348600000  | -0.497600000 | -2.826700000 |
| C | 6.927500000  | 1.484200000  | -3.483200000 |
| H | 7.996300000  | 1.284000000  | -3.401600000 |
| C | 6.477600000  | 2.746700000  | -3.879900000 |
| H | 7.195200000  | 3.533300000  | -4.115500000 |
| C | 5.106900000  | 3.009500000  | -3.975000000 |
| H | 4.756700000  | 3.993300000  | -4.289600000 |
| C | 1.945800000  | 1.450000000  | -5.377800000 |
| C | 2.902300000  | 1.237800000  | -6.383600000 |
| H | 3.949100000  | 1.487800000  | -6.205200000 |
| C | 2.511900000  | 0.691500000  | -7.608400000 |
| H | 3.257100000  | 0.515900000  | -8.385100000 |
| C | 1.170000000  | 0.368500000  | -7.833100000 |
| H | 0.864000000  | -0.063400000 | -8.787700000 |
| C | 0.218700000  | 0.586300000  | -6.831900000 |
| H | -0.826500000 | 0.334200000  | -7.003500000 |
| C | 0.601100000  | 1.112900000  | -5.599000000 |
| H | -0.143100000 | 1.265900000  | -4.812700000 |
| C | 2.026800000  | 3.997200000  | -4.028600000 |
| C | 2.273900000  | 4.614800000  | -5.266600000 |
| H | 2.678200000  | 4.029900000  | -6.095600000 |
| C | 1.979100000  | 5.968300000  | -5.441900000 |
| H | 2.172900000  | 6.443000000  | -6.405500000 |
| C | 1.430500000  | 6.710300000  | -4.386700000 |
| H | 1.192500000  | 7.766800000  | -4.525900000 |
| C | 1.178200000  | 6.095700000  | -3.160600000 |
| H | 0.745700000  | 6.663600000  | -2.342300000 |
| C | 1.466400000  | 4.739800000  | -2.981700000 |
| H | 1.240000000  | 4.250800000  | -2.034500000 |
| N | -2.809200000 | -3.960600000 | 2.853100000  |
| N | -3.799500000 | -4.109600000 | 0.894500000  |
| C | -2.818200000 | -3.461800000 | 1.587200000  |
| C | -3.786300000 | -4.946700000 | 2.982400000  |
| C | -4.423500000 | -5.045700000 | 1.722800000  |
| C | -1.877000000 | -3.456500000 | 3.896500000  |
| H | -1.292600000 | -2.692200000 | 3.364700000  |
| C | -0.907300000 | -4.536200000 | 4.363300000  |
| H | -0.405600000 | -5.005100000 | 3.505900000  |
| H | -1.405600000 | -5.321400000 | 4.950300000  |
| H | -0.144500000 | -4.055700000 | 4.993000000  |
| C | -4.115900000 | -3.798000000 | -0.523600000 |

|   |              |              |              |
|---|--------------|--------------|--------------|
| C | -5.534800000 | -3.255400000 | -0.668400000 |
| H | -3.423000000 | -2.980600000 | -0.771600000 |
| H | -6.297900000 | -4.000300000 | -0.405600000 |
| H | -5.670800000 | -2.367300000 | -0.040000000 |
| C | -4.173200000 | -5.760000000 | 4.052600000  |
| C | -5.455900000 | -5.964200000 | 1.503900000  |
| C | -5.204800000 | -6.671600000 | 3.829800000  |
| C | -5.835300000 | -6.773600000 | 2.575400000  |
| H | -3.687900000 | -5.687200000 | 5.022400000  |
| H | -5.527500000 | -7.319700000 | 4.643900000  |
| H | -6.635700000 | -7.499400000 | 2.436000000  |
| H | -5.944800000 | -6.050800000 | 0.536500000  |
| H | -5.686500000 | -2.936300000 | -1.706500000 |
| C | -2.630500000 | -2.763900000 | 5.026700000  |
| H | -3.292300000 | -1.983700000 | 4.631600000  |
| H | -3.239600000 | -3.467400000 | 5.610100000  |
| H | -1.892900000 | -2.296900000 | 5.697800000  |
| C | -3.792300000 | -4.975700000 | -1.438500000 |
| H | -2.735900000 | -5.264700000 | -1.350000000 |
| H | -4.416400000 | -5.855000000 | -1.226700000 |
| H | -3.965300000 | -4.675300000 | -2.480700000 |

284

4 T1

|    |              |              |              |
|----|--------------|--------------|--------------|
| Au | -0.037800000 | 0.016000000  | -0.056300000 |
| Au | -2.144700000 | 0.832600000  | 1.454000000  |
| Au | -2.470100000 | -0.444100000 | -1.436700000 |
| Au | -1.526300000 | -2.054400000 | 0.907200000  |
| Au | 0.485700000  | -0.548700000 | 2.743500000  |
| Au | 0.331200000  | 2.384400000  | 1.369200000  |
| Au | -1.147700000 | 2.192600000  | -1.115500000 |
| Au | -0.056700000 | -1.544000000 | -2.249500000 |
| Au | 1.166300000  | -2.375300000 | 0.387200000  |
| Au | 2.454400000  | 0.512300000  | 0.828300000  |
| Au | 1.370800000  | 1.257200000  | -1.947100000 |
| Cl | -4.691100000 | -0.733200000 | -2.199800000 |
| Cl | 0.724800000  | -0.986900000 | 5.090800000  |
| P  | -3.796100000 | 1.394600000  | 2.897100000  |
| P  | 1.027000000  | 4.054300000  | 2.776900000  |
| P  | -2.515400000 | 3.753900000  | -2.055600000 |
| P  | -0.124900000 | -2.750200000 | -4.198900000 |
| P  | 2.277300000  | -4.343400000 | 0.654100000  |
| P  | 4.667000000  | 0.735200000  | 1.311300000  |
| P  | 2.528800000  | 2.226100000  | -3.649000000 |
| C  | -4.897700000 | 2.714000000  | 2.301500000  |
| C  | -4.311100000 | 3.778400000  | 1.604200000  |
| H  | -3.239400000 | 3.757500000  | 1.401100000  |
| C  | -5.099700000 | 4.820300000  | 1.131700000  |
| H  | -4.634500000 | 5.637900000  | 0.580800000  |
| C  | -6.481300000 | 4.785000000  | 1.317200000  |
| H  | -7.104900000 | 5.585000000  | 0.916400000  |
| C  | -7.070700000 | 3.713800000  | 1.989500000  |
| H  | -8.153400000 | 3.679200000  | 2.120400000  |
| C  | -6.283200000 | 2.679300000  | 2.492500000  |
| H  | -6.746900000 | 1.840500000  | 3.014600000  |
| C  | -3.039300000 | 2.008900000  | 4.436700000  |
| C  | -2.058600000 | 1.197700000  | 5.025400000  |

|   |              |              |              |
|---|--------------|--------------|--------------|
| H | -1.776800000 | 0.248200000  | 4.571300000  |
| C | -1.415000000 | 1.616800000  | 6.183700000  |
| H | -0.643900000 | 0.980700000  | 6.616400000  |
| C | -1.742200000 | 2.846800000  | 6.755600000  |
| H | -1.226300000 | 3.182000000  | 7.657300000  |
| C | -2.720000000 | 3.648900000  | 6.172300000  |
| H | -2.975200000 | 4.607900000  | 6.617800000  |
| C | -3.370800000 | 3.239600000  | 5.007700000  |
| H | -4.121900000 | 3.878800000  | 4.542800000  |
| C | -4.841400000 | -0.005900000 | 3.417400000  |
| C | -5.366000000 | -0.059800000 | 4.715200000  |
| H | -5.182600000 | 0.759000000  | 5.412900000  |
| C | -6.081200000 | -1.184400000 | 5.127000000  |
| H | -6.471200000 | -1.233100000 | 6.144100000  |
| C | -6.270800000 | -2.253400000 | 4.250400000  |
| H | -6.800200000 | -3.149200000 | 4.580500000  |
| C | -5.768100000 | -2.189400000 | 2.951200000  |
| H | -5.918200000 | -3.031000000 | 2.277000000  |
| C | -5.050900000 | -1.072000000 | 2.528100000  |
| H | -4.620200000 | -1.038400000 | 1.524800000  |
| C | 1.973000000  | 5.342100000  | 1.879200000  |
| C | 2.585600000  | 5.001100000  | 0.667900000  |
| H | 2.531100000  | 3.972300000  | 0.301800000  |
| C | 3.249600000  | 5.977000000  | -0.070700000 |
| H | 3.704300000  | 5.711600000  | -1.022100000 |
| C | 3.324300000  | 7.286100000  | 0.400100000  |
| H | 3.838000000  | 8.049500000  | -0.186900000 |
| C | 2.740100000  | 7.623200000  | 1.619000000  |
| H | 2.799700000  | 8.646300000  | 1.992700000  |
| C | 2.055100000  | 6.656900000  | 2.355700000  |
| H | 1.559600000  | 6.934900000  | 3.286200000  |
| C | -0.302000000 | 5.012800000  | 3.587200000  |
| C | -0.148300000 | 5.549200000  | 4.870600000  |
| H | 0.731000000  | 5.303100000  | 5.467400000  |
| C | -1.124200000 | 6.401300000  | 5.381800000  |
| H | -0.999500000 | 6.830600000  | 6.376100000  |
| C | -2.260700000 | 6.700600000  | 4.629700000  |
| H | -3.025200000 | 7.366400000  | 5.032700000  |
| C | -2.434300000 | 6.131400000  | 3.369400000  |
| H | -3.333900000 | 6.337800000  | 2.790700000  |
| C | -1.454600000 | 5.292900000  | 2.845700000  |
| H | -1.567500000 | 4.855800000  | 1.855200000  |
| C | 2.082300000  | 3.529200000  | 4.164500000  |
| C | 1.644700000  | 2.417000000  | 4.895600000  |
| H | 0.750400000  | 1.875100000  | 4.589400000  |
| C | 2.366200000  | 1.991800000  | 6.001900000  |
| H | 2.018200000  | 1.116300000  | 6.548000000  |
| C | 3.543300000  | 2.647700000  | 6.364500000  |
| H | 4.126000000  | 2.291100000  | 7.213600000  |
| C | 3.988600000  | 3.744600000  | 5.628300000  |
| H | 4.913700000  | 4.249900000  | 5.905500000  |
| C | 3.256600000  | 4.194900000  | 4.532200000  |
| H | 3.605600000  | 5.051400000  | 3.955400000  |
| C | -2.168100000 | 3.808000000  | -3.843300000 |
| C | -2.639900000 | 2.734500000  | -4.618000000 |
| H | -3.272100000 | 1.968800000  | -4.163500000 |



|   |              |              |              |
|---|--------------|--------------|--------------|
| C | -2.283200000 | 2.650100000  | -5.956200000 |
| H | -2.655900000 | 1.823400000  | -6.558000000 |
| C | -1.429100000 | 3.600800000  | -6.520600000 |
| H | -1.123200000 | 3.504700000  | -7.562100000 |
| C | -0.957200000 | 4.657900000  | -5.747500000 |
| H | -0.296500000 | 5.405000000  | -6.184400000 |
| C | -1.333900000 | 4.773800000  | -4.409900000 |
| H | -0.973700000 | 5.610000000  | -3.811200000 |
| C | -4.304500000 | 3.439900000  | -1.961100000 |
| C | -4.782200000 | 2.455600000  | -1.090300000 |
| H | -4.083000000 | 1.861700000  | -0.505000000 |
| C | -6.149100000 | 2.217500000  | -0.988800000 |
| H | -6.505600000 | 1.432300000  | -0.322700000 |
| C | -7.043100000 | 2.974600000  | -1.740200000 |
| H | -8.116000000 | 2.797600000  | -1.650500000 |
| C | -6.571700000 | 3.942100000  | -2.632300000 |
| H | -7.272500000 | 4.510000000  | -3.245700000 |
| C | -5.204100000 | 4.163800000  | -2.759800000 |
| H | -4.832500000 | 4.873000000  | -3.500500000 |
| C | -2.190200000 | 5.426600000  | -1.370400000 |
| C | -3.117700000 | 6.476500000  | -1.434500000 |
| H | -4.074800000 | 6.343000000  | -1.939600000 |
| C | -2.832000000 | 7.691700000  | -0.812500000 |
| H | -3.569200000 | 8.496200000  | -0.843700000 |
| C | -1.615800000 | 7.876400000  | -0.147700000 |
| H | -1.403500000 | 8.823400000  | 0.349100000  |
| C | -0.680100000 | 6.842900000  | -0.101200000 |
| H | 0.266000000  | 6.976400000  | 0.427600000  |
| C | -0.972700000 | 5.620000000  | -0.695700000 |
| H | -0.271300000 | 4.788500000  | -0.596500000 |
| C | -1.247800000 | -2.075300000 | -5.480200000 |
| C | -1.064900000 | -2.323300000 | -6.845800000 |
| H | -0.203800000 | -2.892400000 | -7.193800000 |
| C | -1.968600000 | -1.804100000 | -7.772200000 |
| H | -1.822800000 | -1.991900000 | -8.836400000 |
| C | -3.056600000 | -1.041100000 | -7.344100000 |
| H | -3.763700000 | -0.639500000 | -8.072100000 |
| C | -3.241400000 | -0.797000000 | -5.983200000 |
| H | -4.090500000 | -0.217400000 | -5.622700000 |
| C | -2.337800000 | -1.307600000 | -5.055700000 |
| H | -2.491000000 | -1.105300000 | -3.995400000 |
| C | 1.470500000  | -2.973500000 | -5.056300000 |
| C | 2.437000000  | -1.972900000 | -4.910700000 |
| H | 2.222700000  | -1.114300000 | -4.273600000 |
| C | 3.652400000  | -2.078600000 | -5.578800000 |
| H | 4.403700000  | -1.299500000 | -5.454300000 |
| C | 3.903900000  | -3.177400000 | -6.400900000 |
| H | 4.856700000  | -3.257400000 | -6.924600000 |
| C | 2.944800000  | -4.180800000 | -6.538900000 |
| H | 3.146800000  | -5.045000000 | -7.172100000 |
| C | 1.733000000  | -4.088100000 | -5.860000000 |
| H | 0.996500000  | -4.888900000 | -5.940800000 |
| C | -0.757400000 | -4.446600000 | -3.910500000 |
| C | -1.775700000 | -5.025300000 | -4.676000000 |
| H | -2.239300000 | -4.465300000 | -5.487800000 |
| C | -2.211500000 | -6.320000000 | -4.385800000 |

|   |              |              |              |
|---|--------------|--------------|--------------|
| H | -3.010600000 | -6.764200000 | -4.981500000 |
| C | -1.635500000 | -7.037300000 | -3.340300000 |
| H | -1.985400000 | -8.045200000 | -3.112600000 |
| C | -0.626100000 | -6.456200000 | -2.571000000 |
| H | -0.188200000 | -7.001700000 | -1.735900000 |
| C | -0.195700000 | -5.163200000 | -2.846800000 |
| H | 0.569400000  | -4.694200000 | -2.229300000 |
| C | 2.663400000  | -5.122500000 | -0.944200000 |
| C | 3.156600000  | -4.297400000 | -1.965100000 |
| H | 3.216500000  | -3.218000000 | -1.812800000 |
| C | 3.527800000  | -4.853200000 | -3.182400000 |
| H | 3.928500000  | -4.214900000 | -3.967300000 |
| C | 3.359200000  | -6.220600000 | -3.405300000 |
| H | 3.624300000  | -6.647800000 | -4.373500000 |
| C | 2.842900000  | -7.037800000 | -2.401300000 |
| H | 2.704100000  | -8.105500000 | -2.579100000 |
| C | 2.508000000  | -6.494100000 | -1.161700000 |
| H | 2.117000000  | -7.131700000 | -0.366600000 |
| C | 1.167000000  | -5.516100000 | 1.495700000  |
| C | -0.152900000 | -5.584000000 | 1.012100000  |
| H | -0.449900000 | -4.960800000 | 0.168200000  |
| C | -1.079600000 | -6.405900000 | 1.638900000  |
| H | -2.105600000 | -6.449100000 | 1.273900000  |
| C | -0.705000000 | -7.156700000 | 2.753800000  |
| H | -1.450000000 | -7.771500000 | 3.257700000  |
| C | 0.605500000  | -7.094500000 | 3.231000000  |
| H | 0.892800000  | -7.673000000 | 4.109000000  |
| C | 1.547700000  | -6.276700000 | 2.605200000  |
| H | 2.567100000  | -6.216400000 | 2.990900000  |
| C | 3.884300000  | -4.307700000 | 1.508700000  |
| C | 4.944200000  | -5.131000000 | 1.104300000  |
| H | 4.789600000  | -5.890600000 | 0.337300000  |
| C | 6.211700000  | -4.952200000 | 1.654600000  |
| H | 7.038700000  | -5.580200000 | 1.322800000  |
| C | 6.423000000  | -3.963400000 | 2.614600000  |
| H | 7.418100000  | -3.807100000 | 3.031300000  |
| C | 5.364500000  | -3.158900000 | 3.036000000  |
| H | 5.532300000  | -2.394100000 | 3.790200000  |
| C | 4.097300000  | -3.317200000 | 2.480900000  |
| H | 3.279700000  | -2.654400000 | 2.776600000  |
| C | 5.320000000  | 2.422700000  | 1.100600000  |
| C | 5.580500000  | 2.898700000  | -0.193100000 |
| H | 5.446700000  | 2.239500000  | -1.050400000 |
| C | 6.023500000  | 4.202700000  | -0.373300000 |
| H | 6.238700000  | 4.562400000  | -1.379300000 |
| C | 6.173700000  | 5.050600000  | 0.725800000  |
| H | 6.503000000  | 6.079300000  | 0.580600000  |
| C | 5.881400000  | 4.588000000  | 2.006500000  |
| H | 5.987300000  | 5.252300000  | 2.863500000  |
| C | 5.460100000  | 3.275000000  | 2.201200000  |
| H | 5.240300000  | 2.914000000  | 3.205900000  |
| C | 5.768500000  | -0.353600000 | 0.330400000  |
| C | 5.240200000  | -1.561500000 | -0.146800000 |
| H | 4.175900000  | -1.768800000 | -0.021100000 |
| C | 6.071700000  | -2.489300000 | -0.767000000 |
| H | 5.657800000  | -3.431900000 | -1.125400000 |

|   |              |              |              |
|---|--------------|--------------|--------------|
| C | 7.431500000  | -2.216400000 | -0.916900000 |
| H | 8.082900000  | -2.952300000 | -1.390600000 |
| C | 7.953900000  | -1.000800000 | -0.475500000 |
| H | 9.012200000  | -0.778200000 | -0.613000000 |
| C | 7.126000000  | -0.067200000 | 0.143500000  |
| H | 7.534000000  | 0.892000000  | 0.465000000  |
| C | 5.060200000  | 0.304100000  | 3.053600000  |
| C | 6.387000000  | 0.305500000  | 3.511200000  |
| H | 7.201300000  | 0.587700000  | 2.842300000  |
| C | 6.669000000  | -0.071300000 | 4.820500000  |
| H | 7.702400000  | -0.073300000 | 5.170100000  |
| C | 5.636600000  | -0.471400000 | 5.676500000  |
| H | 5.867600000  | -0.788700000 | 6.695000000  |
| C | 4.320700000  | -0.474400000 | 5.222800000  |
| H | 3.498600000  | -0.799000000 | 5.863600000  |
| C | 4.030400000  | -0.068600000 | 3.921100000  |
| H | 2.992000000  | -0.062100000 | 3.588500000  |
| C | 4.328000000  | 1.969700000  | -3.520200000 |
| C | 4.744500000  | 0.674300000  | -3.170600000 |
| H | 4.003000000  | -0.099700000 | -2.961000000 |
| C | 6.096700000  | 0.386600000  | -3.053800000 |
| H | 6.411200000  | -0.619800000 | -2.779600000 |
| C | 7.043500000  | 1.394200000  | -3.251300000 |
| H | 8.104000000  | 1.169700000  | -3.131600000 |
| C | 6.632700000  | 2.683800000  | -3.584700000 |
| H | 7.372400000  | 3.470600000  | -3.732500000 |
| C | 5.275500000  | 2.975800000  | -3.728300000 |
| H | 4.956700000  | 3.986600000  | -3.986400000 |
| C | 2.092200000  | 1.473700000  | -5.248200000 |
| C | 3.047400000  | 1.165700000  | -6.221500000 |
| H | 4.102100000  | 1.380200000  | -6.043500000 |
| C | 2.649000000  | 0.549500000  | -7.408100000 |
| H | 3.394100000  | 0.281900000  | -8.157600000 |
| C | 1.303200000  | 0.262800000  | -7.627000000 |
| H | 0.990000000  | -0.233200000 | -8.547400000 |
| C | 0.351100000  | 0.602300000  | -6.667900000 |
| H | -0.700700000 | 0.395100000  | -6.843500000 |
| C | 0.738500000  | 1.191500000  | -5.470700000 |
| H | -0.004800000 | 1.421700000  | -4.704100000 |
| C | 2.246800000  | 4.012900000  | -3.880500000 |
| C | 2.507800000  | 4.622700000  | -5.113100000 |
| H | 2.850600000  | 4.023400000  | -5.957800000 |
| C | 2.299500000  | 5.991200000  | -5.260500000 |
| H | 2.504000000  | 6.467900000  | -6.218800000 |
| C | 1.812700000  | 6.745800000  | -4.192100000 |
| H | 1.633700000  | 7.814900000  | -4.318100000 |
| C | 1.539000000  | 6.134100000  | -2.972300000 |
| H | 1.142100000  | 6.720100000  | -2.144400000 |
| C | 1.751700000  | 4.767600000  | -2.814900000 |
| H | 1.516700000  | 4.276800000  | -1.870900000 |
| N | -2.759100000 | -3.770100000 | 3.058600000  |
| N | -3.708400000 | -4.141700000 | 1.117400000  |
| C | -2.778800000 | -3.374500000 | 1.757800000  |
| C | -3.641600000 | -4.822100000 | 3.251100000  |
| C | -4.251500000 | -5.065000000 | 2.002600000  |
| C | -1.871900000 | -3.155200000 | 4.074700000  |

|   |              |              |              |
|---|--------------|--------------|--------------|
| H | -1.401600000 | -2.320900000 | 3.535300000  |
| C | -0.768700000 | -4.121700000 | 4.479600000  |
| H | -0.159900000 | -4.372600000 | 3.601400000  |
| H | -1.170900000 | -5.054900000 | 4.907000000  |
| H | -0.119600000 | -3.630100000 | 5.218100000  |
| C | -4.023800000 | -3.988000000 | -0.321100000 |
| C | -5.493800000 | -3.667000000 | -0.540000000 |
| H | -3.437600000 | -3.112600000 | -0.630200000 |
| H | -6.155600000 | -4.486600000 | -0.224900000 |
| H | -5.777200000 | -2.748000000 | -0.007900000 |
| C | -3.945800000 | -5.602000000 | 4.364800000  |
| C | -5.176200000 | -6.094700000 | 1.838700000  |
| C | -4.872500000 | -6.626700000 | 4.198200000  |
| C | -5.477500000 | -6.870600000 | 2.956000000  |
| H | -3.470600000 | -5.430000000 | 5.326300000  |
| H | -5.128900000 | -7.255300000 | 5.051000000  |
| H | -6.194600000 | -7.685100000 | 2.860500000  |
| H | -5.638900000 | -6.298600000 | 0.877100000  |
| H | -5.653200000 | -3.476300000 | -1.609400000 |
| C | -2.668300000 | -2.566300000 | 5.227100000  |
| H | -3.441200000 | -1.891200000 | 4.844000000  |
| H | -3.156500000 | -3.329400000 | 5.843500000  |
| H | -1.982700000 | -1.988300000 | 5.862800000  |
| C | -3.519800000 | -5.184000000 | -1.117700000 |
| H | -2.466100000 | -5.381400000 | -0.883200000 |
| H | -4.100000000 | -6.099000000 | -0.925600000 |
| H | -3.580500000 | -4.953700000 | -2.190300000 |

282

5 S0

|    |              |              |              |
|----|--------------|--------------|--------------|
| Au | 0.021200000  | 0.047100000  | -0.066200000 |
| Au | -2.071600000 | 0.825700000  | 1.571400000  |
| Au | -2.492100000 | -0.335800000 | -1.260700000 |
| Au | -1.507800000 | -1.992400000 | 0.918400000  |
| Au | 0.545100000  | -0.549400000 | 2.667900000  |
| Au | 0.414200000  | 2.335000000  | 1.392600000  |
| Au | -1.228900000 | 2.229100000  | -1.058400000 |
| Au | 0.033700000  | -1.485000000 | -2.301600000 |
| Au | 1.343700000  | -2.291800000 | 0.211000000  |
| Au | 2.610100000  | 0.380400000  | 0.591000000  |
| Au | 1.381000000  | 1.240300000  | -2.037800000 |
| Cl | -4.513000000 | -0.649800000 | -2.460900000 |
| Cl | 1.005200000  | -1.196700000 | 4.931900000  |
| P  | -3.688600000 | 1.344800000  | 3.098100000  |
| P  | 1.032800000  | 4.095800000  | 2.739100000  |
| P  | -2.567600000 | 3.818000000  | -2.023000000 |
| P  | -0.053500000 | -2.799700000 | -4.200900000 |
| P  | 2.308600000  | -4.335300000 | 0.596500000  |
| P  | 4.805800000  | 0.691400000  | 1.191800000  |
| P  | 2.432300000  | 2.180100000  | -3.859100000 |
| C  | -4.770200000 | 2.741600000  | 2.634200000  |
| C  | -4.222400000 | 3.757600000  | 1.839100000  |
| H  | -3.190500000 | 3.671700000  | 1.494600000  |
| C  | -5.004500000 | 4.849300000  | 1.462000000  |
| H  | -4.571600000 | 5.624200000  | 0.830600000  |
| C  | -6.341300000 | 4.924100000  | 1.858300000  |
| H  | -6.958500000 | 5.767600000  | 1.543500000  |

|   |              |              |              |
|---|--------------|--------------|--------------|
| C | -6.897300000 | 3.904500000  | 2.639500000  |
| H | -7.944600000 | 3.952900000  | 2.940500000  |
| C | -6.115300000 | 2.815000000  | 3.032300000  |
| H | -6.550200000 | 2.017600000  | 3.635700000  |
| C | -2.921000000 | 1.774800000  | 4.698800000  |
| C | -1.950100000 | 0.887000000  | 5.197700000  |
| H | -1.659700000 | 0.002600000  | 4.628600000  |
| C | -1.332600000 | 1.147800000  | 6.418600000  |
| H | -0.575000000 | 0.451600000  | 6.780000000  |
| C | -1.665500000 | 2.301800000  | 7.139700000  |
| H | -1.172900000 | 2.513400000  | 8.091000000  |
| C | -2.616400000 | 3.194200000  | 6.634500000  |
| H | -2.867000000 | 4.101800000  | 7.185100000  |
| C | -3.248600000 | 2.935400000  | 5.412700000  |
| H | -3.983800000 | 3.636600000  | 5.011900000  |
| C | -4.782400000 | -0.071100000 | 3.481000000  |
| C | -5.319700000 | -0.234900000 | 4.769100000  |
| H | -5.082300000 | 0.488000000  | 5.551600000  |
| C | -6.126900000 | -1.338400000 | 5.054900000  |
| H | -6.529300000 | -1.468500000 | 6.060400000  |
| C | -6.405200000 | -2.277900000 | 4.056900000  |
| H | -7.030400000 | -3.144500000 | 4.280600000  |
| C | -5.877700000 | -2.113200000 | 2.771800000  |
| H | -6.099200000 | -2.848000000 | 1.998600000  |
| C | -5.059800000 | -1.018300000 | 2.479000000  |
| H | -4.616700000 | -0.908300000 | 1.485200000  |
| C | 1.979100000  | 5.392500000  | 1.848300000  |
| C | 2.571800000  | 5.076600000  | 0.615500000  |
| H | 2.519000000  | 4.052400000  | 0.234800000  |
| C | 3.219600000  | 6.069900000  | -0.120900000 |
| H | 3.669400000  | 5.819200000  | -1.080000000 |
| C | 3.282800000  | 7.378400000  | 0.365800000  |
| H | 3.777500000  | 8.154100000  | -0.220300000 |
| C | 2.712000000  | 7.693300000  | 1.604600000  |
| H | 2.760500000  | 8.712900000  | 1.989300000  |
| C | 2.058300000  | 6.705600000  | 2.343700000  |
| H | 1.586000000  | 6.956100000  | 3.294600000  |
| C | -0.316900000 | 5.035500000  | 3.548900000  |
| C | -0.252200000 | 5.418100000  | 4.897900000  |
| H | 0.588300000  | 5.102500000  | 5.515700000  |
| C | -1.270100000 | 6.200000000  | 5.449500000  |
| H | -1.217600000 | 6.490300000  | 6.499100000  |
| C | -2.348800000 | 6.607200000  | 4.660800000  |
| H | -3.144600000 | 7.216400000  | 5.092500000  |
| C | -2.415000000 | 6.223500000  | 3.317800000  |
| H | -3.258300000 | 6.530400000  | 2.702900000  |
| C | -1.409400000 | 5.431100000  | 2.763800000  |
| H | -1.460800000 | 5.126200000  | 1.717700000  |
| C | 2.061400000  | 3.531800000  | 4.135700000  |
| C | 1.543600000  | 2.473300000  | 4.901900000  |
| H | 0.623300000  | 1.970600000  | 4.599000000  |
| C | 2.206100000  | 2.069800000  | 6.058100000  |
| H | 1.799400000  | 1.241100000  | 6.636500000  |
| C | 3.399100000  | 2.694500000  | 6.438300000  |
| H | 3.924500000  | 2.365200000  | 7.336100000  |
| C | 3.937600000  | 3.718500000  | 5.651900000  |

|   |              |              |              |
|---|--------------|--------------|--------------|
| H | 4.880500000  | 4.188200000  | 5.934900000  |
| C | 3.267900000  | 4.144700000  | 4.501000000  |
| H | 3.678100000  | 4.950000000  | 3.890000000  |
| C | -2.299200000 | 3.811900000  | -3.830600000 |
| C | -2.756900000 | 2.671200000  | -4.523500000 |
| H | -3.300700000 | 1.886600000  | -3.990800000 |
| C | -2.507500000 | 2.553000000  | -5.888200000 |
| H | -2.859600000 | 1.671900000  | -6.424400000 |
| C | -1.785200000 | 3.544700000  | -6.563100000 |
| H | -1.575700000 | 3.432600000  | -7.627500000 |
| C | -1.319400000 | 4.664700000  | -5.870100000 |
| H | -0.746600000 | 5.432600000  | -6.389300000 |
| C | -1.573600000 | 4.803000000  | -4.500700000 |
| H | -1.201100000 | 5.674100000  | -3.958200000 |
| C | -4.361900000 | 3.518400000  | -1.855500000 |
| C | -4.821200000 | 2.533400000  | -0.971900000 |
| H | -4.109200000 | 1.942000000  | -0.396400000 |
| C | -6.190100000 | 2.293000000  | -0.839100000 |
| H | -6.533500000 | 1.514000000  | -0.158500000 |
| C | -7.105200000 | 3.043900000  | -1.578100000 |
| H | -8.175700000 | 2.859200000  | -1.471600000 |
| C | -6.652200000 | 4.017400000  | -2.479300000 |
| H | -7.365000000 | 4.583300000  | -3.079900000 |
| C | -5.284800000 | 4.244700000  | -2.631800000 |
| H | -4.929000000 | 4.963000000  | -3.371800000 |
| C | -2.212700000 | 5.492800000  | -1.361800000 |
| C | -3.182300000 | 6.503400000  | -1.252100000 |
| H | -4.195700000 | 6.329200000  | -1.613700000 |
| C | -2.860200000 | 7.721900000  | -0.647300000 |
| H | -3.625400000 | 8.493700000  | -0.549500000 |
| C | -1.567600000 | 7.949600000  | -0.163500000 |
| H | -1.323900000 | 8.897700000  | 0.318400000  |
| C | -0.595600000 | 6.951900000  | -0.277700000 |
| H | 0.407700000  | 7.111100000  | 0.117900000  |
| C | -0.920100000 | 5.726400000  | -0.859900000 |
| H | -0.177900000 | 4.926900000  | -0.893400000 |
| C | -1.216600000 | -2.225900000 | -5.499000000 |
| C | -1.059000000 | -2.558400000 | -6.854400000 |
| H | -0.199000000 | -3.145000000 | -7.179400000 |
| C | -1.995900000 | -2.116300000 | -7.791000000 |
| H | -1.866100000 | -2.370000000 | -8.843900000 |
| C | -3.092300000 | -1.346000000 | -7.381700000 |
| H | -3.820500000 | -1.000300000 | -8.117900000 |
| C | -3.251700000 | -1.020000000 | -6.030800000 |
| H | -4.105900000 | -0.434700000 | -5.689000000 |
| C | -2.312900000 | -1.452000000 | -5.093200000 |
| H | -2.450300000 | -1.186900000 | -4.044900000 |
| C | 1.573400000  | -2.981000000 | -5.030600000 |
| C | 2.505500000  | -1.941900000 | -4.890200000 |
| H | 2.251700000  | -1.079400000 | -4.271500000 |
| C | 3.737500000  | -2.009200000 | -5.542800000 |
| H | 4.450400000  | -1.192200000 | -5.431200000 |
| C | 4.048900000  | -3.120700000 | -6.333100000 |
| H | 5.013200000  | -3.174800000 | -6.841700000 |
| C | 3.131500000  | -4.170000000 | -6.458100000 |
| H | 3.380900000  | -5.046200000 | -7.057100000 |

|   |              |              |              |
|---|--------------|--------------|--------------|
| C | 1.897300000  | -4.106100000 | -5.805800000 |
| H | 1.190900000  | -4.933900000 | -5.885600000 |
| C | -0.564300000 | -4.524700000 | -3.843400000 |
| C | -1.512900000 | -5.221000000 | -4.606000000 |
| H | -2.008100000 | -4.733800000 | -5.446400000 |
| C | -1.825300000 | -6.546500000 | -4.284500000 |
| H | -2.568400000 | -7.082600000 | -4.876200000 |
| C | -1.191400000 | -7.180600000 | -3.212400000 |
| H | -1.437200000 | -8.214200000 | -2.965000000 |
| C | -0.247000000 | -6.485300000 | -2.449100000 |
| H | 0.244400000  | -6.963300000 | -1.602900000 |
| C | 0.053100000  | -5.159000000 | -2.752800000 |
| H | 0.773000000  | -4.607100000 | -2.146900000 |
| C | 3.042200000  | -5.089400000 | -0.902600000 |
| C | 3.509200000  | -4.233400000 | -1.914500000 |
| H | 3.401600000  | -3.152200000 | -1.803100000 |
| C | 4.079200000  | -4.762500000 | -3.071900000 |
| H | 4.429400000  | -4.090900000 | -3.855400000 |
| C | 4.165200000  | -6.148000000 | -3.237700000 |
| H | 4.590100000  | -6.560400000 | -4.154600000 |
| C | 3.691500000  | -7.005200000 | -2.238500000 |
| H | 3.748400000  | -8.086700000 | -2.370000000 |
| C | 3.133300000  | -6.479900000 | -1.070500000 |
| H | 2.757800000  | -7.148100000 | -0.293800000 |
| C | 1.136900000  | -5.593700000 | 1.232700000  |
| C | -0.190900000 | -5.572500000 | 0.778500000  |
| H | -0.512700000 | -4.799700000 | 0.079500000  |
| C | -1.098600000 | -6.530700000 | 1.232900000  |
| H | -2.126300000 | -6.513900000 | 0.871500000  |
| C | -0.695100000 | -7.498900000 | 2.155700000  |
| H | -1.413000000 | -8.233800000 | 2.522800000  |
| C | 0.624300000  | -7.515500000 | 2.619500000  |
| H | 0.938900000  | -8.260400000 | 3.350800000  |
| C | 1.541000000  | -6.567000000 | 2.160000000  |
| H | 2.565700000  | -6.569800000 | 2.533000000  |
| C | 3.653200000  | -4.273600000 | 1.826100000  |
| C | 4.851400000  | -4.987600000 | 1.659300000  |
| H | 5.003200000  | -5.600300000 | 0.768000000  |
| C | 5.849500000  | -4.908200000 | 2.636300000  |
| H | 6.783800000  | -5.456300000 | 2.499300000  |
| C | 5.649700000  | -4.127000000 | 3.780500000  |
| H | 6.432600000  | -4.059900000 | 4.539000000  |
| C | 4.450500000  | -3.422700000 | 3.949300000  |
| H | 4.292600000  | -2.806000000 | 4.833800000  |
| C | 3.456200000  | -3.478500000 | 2.971400000  |
| H | 2.535400000  | -2.902500000 | 3.105000000  |
| C | 5.404000000  | 2.399700000  | 0.919200000  |
| C | 5.514600000  | 2.868100000  | -0.404100000 |
| H | 5.265100000  | 2.212100000  | -1.240800000 |
| C | 5.970900000  | 4.162400000  | -0.647000000 |
| H | 6.071200000  | 4.507700000  | -1.677500000 |
| C | 6.287500000  | 5.009600000  | 0.424500000  |
| H | 6.637800000  | 6.025100000  | 0.233700000  |
| C | 6.136500000  | 4.559500000  | 1.740300000  |
| H | 6.364800000  | 5.221600000  | 2.577500000  |
| C | 5.696700000  | 3.256400000  | 1.992700000  |

|   |              |              |              |
|---|--------------|--------------|--------------|
| H | 5.584900000  | 2.905500000  | 3.020400000  |
| C | 5.951000000  | -0.378700000 | 0.230200000  |
| C | 5.498800000  | -1.657500000 | -0.135600000 |
| H | 4.475700000  | -1.957700000 | 0.103700000  |
| C | 6.354800000  | -2.543800000 | -0.790000000 |
| H | 5.994000000  | -3.535300000 | -1.065600000 |
| C | 7.665700000  | -2.157600000 | -1.091100000 |
| H | 8.332500000  | -2.850000000 | -1.607200000 |
| C | 8.117400000  | -0.881200000 | -0.737700000 |
| H | 9.135400000  | -0.572500000 | -0.978500000 |
| C | 7.264300000  | 0.008100000  | -0.079700000 |
| H | 7.614000000  | 1.008000000  | 0.180900000  |
| C | 5.207800000  | 0.310500000  | 2.939200000  |
| C | 6.545600000  | 0.199100000  | 3.359600000  |
| H | 7.359000000  | 0.342800000  | 2.647700000  |
| C | 6.832800000  | -0.108000000 | 4.689400000  |
| H | 7.871400000  | -0.197300000 | 5.010900000  |
| C | 5.789700000  | -0.314600000 | 5.603300000  |
| H | 6.017600000  | -0.572000000 | 6.639900000  |
| C | 4.462900000  | -0.204300000 | 5.184900000  |
| H | 3.636400000  | -0.388200000 | 5.870500000  |
| C | 4.169000000  | 0.112500000  | 3.856000000  |
| H | 3.127400000  | 0.184300000  | 3.541700000  |
| C | 4.239800000  | 1.910300000  | -3.764800000 |
| C | 4.669400000  | 0.641500000  | -3.333200000 |
| H | 3.935800000  | -0.107300000 | -3.029200000 |
| C | 6.028900000  | 0.348000000  | -3.261000000 |
| H | 6.351000000  | -0.635100000 | -2.917300000 |
| C | 6.973000000  | 1.329000000  | -3.585400000 |
| H | 8.037100000  | 1.106700000  | -3.497500000 |
| C | 6.551400000  | 2.597100000  | -3.996800000 |
| H | 7.285500000  | 3.366000000  | -4.239600000 |
| C | 5.186700000  | 2.888900000  | -4.094700000 |
| H | 4.856700000  | 3.876900000  | -4.419700000 |
| C | 1.960200000  | 1.433600000  | -5.455300000 |
| C | 2.888300000  | 1.233300000  | -6.490200000 |
| H | 3.938400000  | 1.490800000  | -6.340900000 |
| C | 2.465400000  | 0.690600000  | -7.705800000 |
| H | 3.188600000  | 0.524300000  | -8.505700000 |
| C | 1.118600000  | 0.358600000  | -7.892000000 |
| H | 0.787200000  | -0.070300000 | -8.839600000 |
| C | 0.194900000  | 0.565300000  | -6.862700000 |
| H | -0.854600000 | 0.309200000  | -7.005700000 |
| C | 0.610900000  | 1.090500000  | -5.639700000 |
| H | -0.110300000 | 1.235900000  | -4.831100000 |
| C | 2.185200000  | 3.978100000  | -4.105900000 |
| C | 2.266600000  | 4.566500000  | -5.378200000 |
| H | 2.478800000  | 3.948200000  | -6.251300000 |
| C | 2.044600000  | 5.937300000  | -5.527300000 |
| H | 2.098100000  | 6.388200000  | -6.519600000 |
| C | 1.737000000  | 6.725100000  | -4.412600000 |
| H | 1.549300000  | 7.793100000  | -4.532700000 |
| C | 1.653500000  | 6.140500000  | -3.145600000 |
| H | 1.403700000  | 6.745800000  | -2.275100000 |
| C | 1.871000000  | 4.770400000  | -2.992400000 |
| H | 1.779000000  | 4.301200000  | -2.011000000 |



|   |              |              |              |
|---|--------------|--------------|--------------|
| N | -3.681500000 | -4.130800000 | 0.998600000  |
| N | -2.692200000 | -3.893900000 | 2.969400000  |
| C | -2.701800000 | -3.451700000 | 1.676300000  |
| C | -4.290700000 | -5.028500000 | 1.862400000  |
| C | -3.656200000 | -4.874100000 | 3.125800000  |
| C | -3.983800000 | -3.920100000 | -0.447500000 |
| H | -3.343700000 | -3.071400000 | -0.728700000 |
| C | -5.439100000 | -3.513000000 | -0.651600000 |
| H | -5.657800000 | -2.573900000 | -0.128100000 |
| H | -6.126200000 | -4.301400000 | -0.316300000 |
| H | -5.598200000 | -3.319100000 | -1.719600000 |
| C | -1.755100000 | -3.372600000 | 4.003700000  |
| C | -0.757700000 | -4.445900000 | 4.422900000  |
| H | -1.208900000 | -2.578700000 | 3.476000000  |
| H | -1.259100000 | -5.265700000 | 4.955100000  |
| H | -0.233900000 | -4.850500000 | 3.546800000  |
| N | -5.267100000 | -5.897400000 | 1.630300000  |
| N | -3.977600000 | -5.583000000 | 4.200900000  |
| C | -5.601800000 | -6.616900000 | 2.724600000  |
| C | -4.975600000 | -6.463300000 | 3.971300000  |
| H | -6.400600000 | -7.349400000 | 2.599000000  |
| H | -5.287500000 | -7.076400000 | 4.818200000  |
| H | -0.014800000 | -3.980700000 | 5.083700000  |
| C | -2.516800000 | -2.751700000 | 5.167900000  |
| H | -3.240700000 | -2.011400000 | 4.811600000  |
| H | -3.047200000 | -3.517500000 | 5.750600000  |
| H | -1.791100000 | -2.249400000 | 5.817000000  |
| C | -3.570700000 | -5.142100000 | -1.259900000 |
| H | -2.503300000 | -5.361500000 | -1.130800000 |
| H | -4.160500000 | -6.025100000 | -0.976700000 |
| H | -3.735600000 | -4.938200000 | -2.326200000 |

282

5 T1

|    |              |              |              |
|----|--------------|--------------|--------------|
| Au | -0.023100000 | -0.005200000 | -0.082800000 |
| Au | -2.148900000 | 0.738900000  | 1.494500000  |
| Au | -2.553300000 | -0.387900000 | -1.229700000 |
| Au | -1.545800000 | -2.015800000 | 1.017500000  |
| Au | 0.477700000  | -0.552800000 | 2.651400000  |
| Au | 0.386600000  | 2.248800000  | 1.438400000  |
| Au | -1.262300000 | 2.142000000  | -1.104700000 |
| Au | -0.018700000 | -1.467800000 | -2.324800000 |
| Au | 1.263300000  | -2.353900000 | 0.280200000  |
| Au | 2.572800000  | 0.337400000  | 0.520300000  |
| Au | 1.346900000  | 1.165400000  | -2.066300000 |
| Cl | -4.570000000 | -0.738900000 | -2.410600000 |
| Cl | 0.810400000  | -0.956800000 | 4.981800000  |
| P  | -3.811400000 | 1.242200000  | 2.963600000  |
| P  | 1.079000000  | 3.950900000  | 2.770200000  |
| P  | -2.499000000 | 3.844200000  | -1.963200000 |
| P  | -0.139900000 | -2.757000000 | -4.195100000 |
| P  | 2.318200000  | -4.341700000 | 0.601200000  |
| P  | 4.746100000  | 0.703100000  | 1.136500000  |
| P  | 2.487000000  | 2.161000000  | -3.797700000 |
| C  | -4.998200000 | 2.498000000  | 2.386200000  |
| C  | -4.484100000 | 3.625200000  | 1.730400000  |
| H  | -3.410100000 | 3.696400000  | 1.555700000  |

|   |              |              |              |
|---|--------------|--------------|--------------|
| C | -5.344200000 | 4.617500000  | 1.275000000  |
| H | -4.938800000 | 5.486800000  | 0.758100000  |
| C | -6.721600000 | 4.473200000  | 1.430500000  |
| H | -7.396600000 | 5.236200000  | 1.041000000  |
| C | -7.237400000 | 3.337700000  | 2.054600000  |
| H | -8.315300000 | 3.213000000  | 2.160100000  |
| C | -6.380700000 | 2.352100000  | 2.544100000  |
| H | -6.786700000 | 1.465300000  | 3.033500000  |
| C | -3.073800000 | 1.868500000  | 4.507500000  |
| C | -2.113000000 | 1.040600000  | 5.111000000  |
| H | -1.838800000 | 0.083400000  | 4.663300000  |
| C | -1.487800000 | 1.450300000  | 6.281300000  |
| H | -0.740600000 | 0.796700000  | 6.732400000  |
| C | -1.800800000 | 2.691700000  | 6.844500000  |
| H | -1.299400000 | 3.019300000  | 7.756700000  |
| C | -2.749100000 | 3.515500000  | 6.238700000  |
| H | -2.996000000 | 4.483600000  | 6.677400000  |
| C | -3.390500000 | 3.111100000  | 5.067400000  |
| H | -4.129000000 | 3.760600000  | 4.592900000  |
| C | -4.793300000 | -0.204400000 | 3.489300000  |
| C | -5.296100000 | -0.284000000 | 4.794700000  |
| H | -5.106200000 | 0.523100000  | 5.505200000  |
| C | -5.997300000 | -1.419300000 | 5.199400000  |
| H | -6.360400000 | -1.493300000 | 6.224900000  |
| C | -6.206500000 | -2.466900000 | 4.302500000  |
| H | -6.729400000 | -3.369500000 | 4.622500000  |
| C | -5.734400000 | -2.373700000 | 2.993800000  |
| H | -5.918000000 | -3.190300000 | 2.296700000  |
| C | -5.017300000 | -1.251500000 | 2.583000000  |
| H | -4.609200000 | -1.194300000 | 1.572100000  |
| C | 2.042900000  | 5.218300000  | 1.871000000  |
| C | 2.582000000  | 4.905600000  | 0.615300000  |
| H | 2.474500000  | 3.894600000  | 0.212300000  |
| C | 3.243500000  | 5.887800000  | -0.114900000 |
| H | 3.648900000  | 5.646800000  | -1.096700000 |
| C | 3.388000000  | 7.172800000  | 0.406900000  |
| H | 3.899300000  | 7.940400000  | -0.175600000 |
| C | 2.876200000  | 7.479700000  | 1.668900000  |
| H | 2.986600000  | 8.484800000  | 2.078500000  |
| C | 2.192900000  | 6.508500000  | 2.397900000  |
| H | 1.750100000  | 6.762500000  | 3.362500000  |
| C | -0.307300000 | 4.886600000  | 3.507900000  |
| C | -0.229100000 | 5.420400000  | 4.801800000  |
| H | 0.625500000  | 5.193100000  | 5.442100000  |
| C | -1.251400000 | 6.242700000  | 5.269100000  |
| H | -1.188300000 | 6.660000000  | 6.275800000  |
| C | -2.352600000 | 6.524700000  | 4.458700000  |
| H | -3.150700000 | 7.171000000  | 4.827200000  |
| C | -2.443100000 | 5.970100000  | 3.181500000  |
| H | -3.308300000 | 6.178500000  | 2.552500000  |
| C | -1.426900000 | 5.148000000  | 2.705500000  |
| H | -1.486000000 | 4.712500000  | 1.705800000  |
| C | 2.072600000  | 3.444300000  | 4.199900000  |
| C | 1.511100000  | 2.457700000  | 5.024300000  |
| H | 0.565600000  | 1.988500000  | 4.750900000  |
| C | 2.165500000  | 2.081800000  | 6.189300000  |

|   |              |              |              |
|---|--------------|--------------|--------------|
| H | 1.721900000  | 1.312400000  | 6.820400000  |
| C | 3.401200000  | 2.646000000  | 6.512500000  |
| H | 3.926400000  | 2.330200000  | 7.416000000  |
| C | 3.981700000  | 3.592800000  | 5.667900000  |
| H | 4.955800000  | 4.017900000  | 5.914200000  |
| C | 3.314300000  | 4.006900000  | 4.515900000  |
| H | 3.751900000  | 4.766200000  | 3.867600000  |
| C | -2.131500000 | 3.966100000  | -3.743900000 |
| C | -2.502000000 | 2.856100000  | -4.525100000 |
| H | -3.081000000 | 2.045300000  | -4.078900000 |
| C | -2.113300000 | 2.792100000  | -5.854700000 |
| H | -2.396700000 | 1.930400000  | -6.457600000 |
| C | -1.339200000 | 3.811700000  | -6.407900000 |
| H | -1.009100000 | 3.738800000  | -7.443800000 |
| C | -0.985300000 | 4.914300000  | -5.635600000 |
| H | -0.394500000 | 5.716300000  | -6.070700000 |
| C | -1.380000000 | 4.999200000  | -4.300900000 |
| H | -1.094400000 | 5.860800000  | -3.696200000 |
| C | -4.297200000 | 3.581500000  | -1.889100000 |
| C | -4.807800000 | 2.526100000  | -1.126600000 |
| H | -4.133300000 | 1.876600000  | -0.572500000 |
| C | -6.178100000 | 2.290300000  | -1.090800000 |
| H | -6.558600000 | 1.450000000  | -0.511300000 |
| C | -7.044000000 | 3.126800000  | -1.788400000 |
| H | -8.119900000 | 2.950000000  | -1.750200000 |
| C | -6.539800000 | 4.177800000  | -2.560000000 |
| H | -7.218300000 | 4.814700000  | -3.128400000 |
| C | -5.167100000 | 4.394300000  | -2.631600000 |
| H | -4.768700000 | 5.172500000  | -3.284900000 |
| C | -2.118300000 | 5.448700000  | -1.170400000 |
| C | -3.079200000 | 6.440700000  | -0.940800000 |
| H | -4.102700000 | 6.306500000  | -1.290900000 |
| C | -2.732700000 | 7.597400000  | -0.241300000 |
| H | -3.490400000 | 8.358700000  | -0.048900000 |
| C | -1.425400000 | 7.784500000  | 0.206000000  |
| H | -1.159800000 | 8.686600000  | 0.760200000  |
| C | -0.459400000 | 6.809000000  | -0.038000000 |
| H | 0.558900000  | 6.945500000  | 0.324100000  |
| C | -0.807200000 | 5.637600000  | -0.701900000 |
| H | -0.075600000 | 4.836800000  | -0.815100000 |
| C | -1.251300000 | -2.083800000 | -5.484300000 |
| C | -1.112600000 | -2.423500000 | -6.836000000 |
| H | -0.298000000 | -3.069700000 | -7.163700000 |
| C | -2.004000000 | -1.906100000 | -7.772800000 |
| H | -1.893000000 | -2.169900000 | -8.825000000 |
| C | -3.032500000 | -1.050800000 | -7.369200000 |
| H | -3.729300000 | -0.651100000 | -8.107300000 |
| C | -3.171400000 | -0.714700000 | -6.022400000 |
| H | -3.981800000 | -0.066600000 | -5.685900000 |
| C | -2.280400000 | -1.224300000 | -5.082600000 |
| H | -2.403900000 | -0.955900000 | -4.034600000 |
| C | 1.463000000  | -3.011600000 | -5.037000000 |
| C | 2.431300000  | -2.005900000 | -4.929200000 |
| H | 2.226100000  | -1.133600000 | -4.306800000 |
| C | 3.637800000  | -2.124500000 | -5.611600000 |
| H | 4.392200000  | -1.342700000 | -5.512500000 |

|   |              |              |              |
|---|--------------|--------------|--------------|
| C | 3.876800000  | -3.241100000 | -6.415100000 |
| H | 4.820100000  | -3.330000000 | -6.955700000 |
| C | 2.919300000  | -4.253200000 | -6.510800000 |
| H | 3.113700000  | -5.134600000 | -7.123700000 |
| C | 1.717700000  | -4.149900000 | -5.812800000 |
| H | 0.985600000  | -4.959500000 | -5.856700000 |
| C | -0.762000000 | -4.448000000 | -3.874400000 |
| C | -1.816000000 | -5.018600000 | -4.594000000 |
| H | -2.320600000 | -4.452500000 | -5.377600000 |
| C | -2.230600000 | -6.317400000 | -4.295200000 |
| H | -3.058800000 | -6.757900000 | -4.851000000 |
| C | -1.602500000 | -7.042200000 | -3.285700000 |
| H | -1.941100000 | -8.050600000 | -3.045900000 |
| C | -0.558300000 | -6.467000000 | -2.560100000 |
| H | -0.082200000 | -7.019100000 | -1.750000000 |
| C | -0.142800000 | -5.172500000 | -2.846800000 |
| H | 0.660300000  | -4.710800000 | -2.272600000 |
| C | 2.799600000  | -5.123400000 | -0.968800000 |
| C | 3.309700000  | -4.292200000 | -1.978200000 |
| H | 3.381800000  | -3.214800000 | -1.813900000 |
| C | 3.681600000  | -4.839100000 | -3.198800000 |
| H | 4.084300000  | -4.194500000 | -3.978000000 |
| C | 3.504100000  | -6.202400000 | -3.436700000 |
| H | 3.759300000  | -6.617800000 | -4.412200000 |
| C | 2.985100000  | -7.026800000 | -2.440300000 |
| H | 2.835000000  | -8.089500000 | -2.631400000 |
| C | 2.645400000  | -6.493000000 | -1.197800000 |
| H | 2.240000000  | -7.134100000 | -0.412700000 |
| C | 1.222300000  | -5.526400000 | 1.436900000  |
| C | -0.107300000 | -5.601900000 | 0.985600000  |
| H | -0.443000000 | -4.960800000 | 0.168800000  |
| C | -0.998700000 | -6.466700000 | 1.612200000  |
| H | -2.030300000 | -6.528400000 | 1.266600000  |
| C | -0.581700000 | -7.234300000 | 2.700300000  |
| H | -1.296400000 | -7.881300000 | 3.211600000  |
| C | 0.736200000  | -7.155000000 | 3.151800000  |
| H | 1.057700000  | -7.744300000 | 4.011300000  |
| C | 1.644600000  | -6.305200000 | 2.519800000  |
| H | 2.672500000  | -6.226500000 | 2.879400000  |
| C | 3.871700000  | -4.199400000 | 1.534900000  |
| C | 5.017500000  | -4.908600000 | 1.148800000  |
| H | 4.969900000  | -5.628600000 | 0.329900000  |
| C | 6.229100000  | -4.668000000 | 1.791900000  |
| H | 7.125400000  | -5.205600000 | 1.477200000  |
| C | 6.293900000  | -3.740000000 | 2.829800000  |
| H | 7.242400000  | -3.543700000 | 3.330500000  |
| C | 5.146000000  | -3.054400000 | 3.233300000  |
| H | 5.195400000  | -2.343300000 | 4.056000000  |
| C | 3.936300000  | -3.264400000 | 2.582100000  |
| H | 3.052100000  | -2.687300000 | 2.868600000  |
| C | 5.339400000  | 2.412200000  | 0.911900000  |
| C | 5.572900000  | 2.883500000  | -0.387300000 |
| H | 5.424700000  | 2.219400000  | -1.237700000 |
| C | 6.017100000  | 4.185900000  | -0.580600000 |
| H | 6.216900000  | 4.538500000  | -1.592200000 |
| C | 6.186700000  | 5.039400000  | 0.511600000  |

|   |              |              |              |
|---|--------------|--------------|--------------|
| H | 6.519500000  | 6.066400000  | 0.355300000  |
| C | 5.911400000  | 4.585300000  | 1.799000000  |
| H | 6.029700000  | 5.256400000  | 2.650200000  |
| C | 5.498300000  | 3.270400000  | 2.006300000  |
| H | 5.307400000  | 2.908500000  | 3.017000000  |
| C | 5.924400000  | -0.353700000 | 0.215100000  |
| C | 5.471400000  | -1.614000000 | -0.201700000 |
| H | 4.434200000  | -1.899400000 | -0.020900000 |
| C | 6.341500000  | -2.494800000 | -0.835300000 |
| H | 5.978300000  | -3.470900000 | -1.159900000 |
| C | 7.669600000  | -2.125600000 | -1.053300000 |
| H | 8.352400000  | -2.818100000 | -1.547200000 |
| C | 8.119300000  | -0.866500000 | -0.652400000 |
| H | 9.152700000  | -0.571400000 | -0.835500000 |
| C | 7.250300000  | 0.023100000  | -0.024500000 |
| H | 7.599700000  | 1.016100000  | 0.262700000  |
| C | 5.091400000  | 0.347100000  | 2.898800000  |
| C | 6.411700000  | 0.239700000  | 3.357300000  |
| H | 7.247200000  | 0.349500000  | 2.664500000  |
| C | 6.657900000  | -0.025500000 | 4.701400000  |
| H | 7.686500000  | -0.104000000 | 5.056300000  |
| C | 5.591200000  | -0.214500000 | 5.585300000  |
| H | 5.787600000  | -0.451300000 | 6.633100000  |
| C | 4.279800000  | -0.125200000 | 5.125200000  |
| H | 3.434900000  | -0.315200000 | 5.786800000  |
| C | 4.026100000  | 0.179000000  | 3.788800000  |
| H | 2.993600000  | 0.255300000  | 3.446200000  |
| C | 4.286800000  | 1.899300000  | -3.656000000 |
| C | 4.700400000  | 0.611500000  | -3.275000000 |
| H | 3.958900000  | -0.152000000 | -3.028400000 |
| C | 6.053600000  | 0.317400000  | -3.177800000 |
| H | 6.365400000  | -0.682900000 | -2.880300000 |
| C | 7.005500000  | 1.310700000  | -3.424800000 |
| H | 8.066500000  | 1.082600000  | -3.318700000 |
| C | 6.598800000  | 2.594600000  | -3.785200000 |
| H | 7.342400000  | 3.371400000  | -3.971800000 |
| C | 5.240400000  | 2.891700000  | -3.910000000 |
| H | 4.923900000  | 3.896100000  | -4.196900000 |
| C | 2.074900000  | 1.393100000  | -5.396000000 |
| C | 3.043900000  | 1.105000000  | -6.364400000 |
| H | 4.094800000  | 1.337400000  | -6.179400000 |
| C | 2.663300000  | 0.488500000  | -7.553500000 |
| H | 3.419800000  | 0.234400000  | -8.296700000 |
| C | 1.321100000  | 0.187000000  | -7.784600000 |
| H | 1.024200000  | -0.303500000 | -8.711700000 |
| C | 0.355000000  | 0.502100000  | -6.829600000 |
| H | -0.693600000 | 0.281200000  | -7.017200000 |
| C | 0.727200000  | 1.081500000  | -5.624900000 |
| H | -0.023500000 | 1.286700000  | -4.858000000 |
| C | 2.242700000  | 3.948500000  | -4.057400000 |
| C | 2.459000000  | 4.546700000  | -5.305600000 |
| H | 2.735900000  | 3.934300000  | -6.167200000 |
| C | 2.297600000  | 5.923400000  | -5.444100000 |
| H | 2.469400000  | 6.390900000  | -6.413900000 |
| C | 1.901300000  | 6.699700000  | -4.349700000 |
| H | 1.762100000  | 7.776200000  | -4.465200000 |

|   |              |              |              |
|---|--------------|--------------|--------------|
| C | 1.665600000  | 6.100300000  | -3.115400000 |
| H | 1.337800000  | 6.702700000  | -2.265700000 |
| C | 1.835300000  | 4.726100000  | -2.968100000 |
| H | 1.640800000  | 4.240300000  | -2.011800000 |
| N | -3.626700000 | -4.211900000 | 1.130700000  |
| N | -2.660100000 | -3.880900000 | 3.089400000  |
| C | -2.687400000 | -3.461200000 | 1.786600000  |
| C | -4.180800000 | -5.124500000 | 2.009000000  |
| C | -3.560100000 | -4.911800000 | 3.261200000  |
| C | -3.962400000 | -4.032700000 | -0.300800000 |
| H | -3.349000000 | -3.175400000 | -0.613200000 |
| C | -5.428400000 | -3.671200000 | -0.479500000 |
| H | -5.668500000 | -2.740600000 | 0.052000000  |
| H | -6.081400000 | -4.483600000 | -0.127200000 |
| H | -5.616700000 | -3.485100000 | -1.546100000 |
| C | -1.780300000 | -3.279600000 | 4.117900000  |
| C | -0.663800000 | -4.241100000 | 4.482400000  |
| H | -1.341900000 | -2.412300000 | 3.607100000  |
| H | -1.071100000 | -5.159400000 | 4.934100000  |
| H | -0.087300000 | -4.501700000 | 3.583200000  |
| N | -5.115900000 | -6.040500000 | 1.782700000  |
| N | -3.837400000 | -5.613000000 | 4.355600000  |
| C | -5.410200000 | -6.756800000 | 2.901000000  |
| C | -4.795100000 | -6.550600000 | 4.134400000  |
| H | -6.172600000 | -7.529500000 | 2.790100000  |
| H | -5.075000000 | -7.163600000 | 4.992300000  |
| H | 0.010500000  | -3.744000000 | 5.193600000  |
| C | -2.583400000 | -2.780100000 | 5.307800000  |
| H | -3.376700000 | -2.096600000 | 4.978300000  |
| H | -3.033200000 | -3.614500000 | 5.865100000  |
| H | -1.898100000 | -2.229000000 | 5.969800000  |
| C | -3.533600000 | -5.256500000 | -1.091200000 |
| H | -2.466800000 | -5.456100000 | -0.934500000 |
| H | -4.117300000 | -6.142600000 | -0.798900000 |
| H | -3.682100000 | -5.067400000 | -2.162700000 |

282

5 S1

|    |              |              |              |
|----|--------------|--------------|--------------|
| Au | 0.012098000  | 0.049034000  | -0.066902000 |
| Au | -2.079292000 | 0.827476000  | 1.566433000  |
| Au | -2.500044000 | -0.325358000 | -1.265010000 |
| Au | -1.521199000 | -1.988962000 | 0.911377000  |
| Au | 0.532096000  | -0.554708000 | 2.665676000  |
| Au | 0.409265000  | 2.333766000  | 1.393621000  |
| Au | -1.229773000 | 2.235324000  | -1.056743000 |
| Au | 0.024779000  | -1.478553000 | -2.303409000 |
| Au | 1.329262000  | -2.292154000 | 0.209651000  |
| Au | 2.600209000  | 0.376169000  | 0.591761000  |
| Au | 1.375825000  | 1.243406000  | -2.032971000 |
| Cl | -4.517965000 | -0.630379000 | -2.472076000 |
| Cl | 0.985623000  | -1.195517000 | 4.930161000  |
| P  | -3.689339000 | 1.346569000  | 3.093174000  |
| P  | 1.035029000  | 4.083912000  | 2.745059000  |
| P  | -2.558314000 | 3.830744000  | -2.020052000 |
| P  | -0.051034000 | -2.786140000 | -4.201461000 |
| P  | 2.295526000  | -4.334245000 | 0.590637000  |
| P  | 4.795417000  | 0.681514000  | 1.193193000  |

|   |              |              |              |
|---|--------------|--------------|--------------|
| P | 2.428141000  | 2.178744000  | -3.852281000 |
| C | -4.790766000 | 2.712862000  | 2.596843000  |
| C | -4.246305000 | 3.728214000  | 1.799828000  |
| H | -3.203335000 | 3.661528000  | 1.482073000  |
| C | -5.043981000 | 4.790365000  | 1.381467000  |
| H | -4.613962000 | 5.564662000  | 0.745358000  |
| C | -6.389222000 | 4.838543000  | 1.745122000  |
| H | -7.018172000 | 5.661642000  | 1.401913000  |
| C | -6.937927000 | 3.823118000  | 2.533280000  |
| H | -7.991419000 | 3.856007000  | 2.812251000  |
| C | -6.144235000 | 2.758187000  | 2.961332000  |
| H | -6.578104000 | 1.959577000  | 3.562930000  |
| C | -2.905351000 | 1.822778000  | 4.670050000  |
| C | -1.950231000 | 0.932679000  | 5.188859000  |
| H | -1.687679000 | 0.022267000  | 4.649175000  |
| C | -1.311257000 | 1.225514000  | 6.388261000  |
| H | -0.567054000 | 0.525505000  | 6.767324000  |
| C | -1.607570000 | 2.412866000  | 7.066747000  |
| H | -1.101932000 | 2.646413000  | 8.004988000  |
| C | -2.540385000 | 3.307271000  | 6.539496000  |
| H | -2.764149000 | 4.238401000  | 7.061726000  |
| C | -3.193593000 | 3.019238000  | 5.338405000  |
| H | -3.913444000 | 3.725239000  | 4.920816000  |
| C | -4.737072000 | -0.092683000 | 3.506831000  |
| C | -5.245641000 | -0.260353000 | 4.803067000  |
| H | -5.027883000 | 0.479730000  | 5.574310000  |
| C | -5.993625000 | -1.397722000 | 5.113732000  |
| H | -6.375644000 | -1.532055000 | 6.125418000  |
| C | -6.234006000 | -2.367690000 | 4.137717000  |
| H | -6.804766000 | -3.265570000 | 4.383801000  |
| C | -5.738632000 | -2.195829000 | 2.843637000  |
| H | -5.933501000 | -2.953845000 | 2.086183000  |
| C | -4.985888000 | -1.064362000 | 2.522750000  |
| H | -4.564320000 | -0.950018000 | 1.521749000  |
| C | 1.970209000  | 5.376708000  | 1.844399000  |
| C | 2.601281000  | 5.040577000  | 0.637289000  |
| H | 2.578272000  | 4.005849000  | 0.278328000  |
| C | 3.250144000  | 6.026284000  | -0.103206000 |
| H | 3.723997000  | 5.763855000  | -1.049276000 |
| C | 3.287090000  | 7.341281000  | 0.360735000  |
| H | 3.790296000  | 8.111619000  | -0.226694000 |
| C | 2.679031000  | 7.674155000  | 1.574614000  |
| H | 2.709814000  | 8.701498000  | 1.941306000  |
| C | 2.010708000  | 6.698383000  | 2.313005000  |
| H | 1.501937000  | 6.965837000  | 3.242191000  |
| C | -0.320794000 | 5.002889000  | 3.560509000  |
| C | -0.276708000 | 5.338626000  | 4.920885000  |
| H | 0.553845000  | 5.003732000  | 5.544525000  |
| C | -1.303076000 | 6.101545000  | 5.476134000  |
| H | -1.264436000 | 6.365455000  | 6.533934000  |
| C | -2.370594000 | 6.525584000  | 4.683918000  |
| H | -3.172370000 | 7.122929000  | 5.120710000  |
| C | -2.417958000 | 6.182505000  | 3.331151000  |
| H | -3.254490000 | 6.505319000  | 2.713241000  |
| C | -1.400524000 | 5.416904000  | 2.768449000  |
| H | -1.434680000 | 5.145480000  | 1.711150000  |

|   |              |              |              |
|---|--------------|--------------|--------------|
| C | 2.077003000  | 3.518811000  | 4.127248000  |
| C | 1.558501000  | 2.469126000  | 4.901167000  |
| H | 0.620596000  | 1.987424000  | 4.619172000  |
| C | 2.246256000  | 2.044755000  | 6.031516000  |
| H | 1.838479000  | 1.223318000  | 6.618557000  |
| C | 3.465282000  | 2.636634000  | 6.374712000  |
| H | 4.013090000  | 2.289721000  | 7.252437000  |
| C | 3.999073000  | 3.654451000  | 5.581937000  |
| H | 4.959386000  | 4.103208000  | 5.841890000  |
| C | 3.303846000  | 4.106617000  | 4.459091000  |
| H | 3.712023000  | 4.908959000  | 3.841478000  |
| C | -2.263493000 | 3.830053000  | -3.820884000 |
| C | -2.736815000 | 2.705633000  | -4.524066000 |
| H | -3.333641000 | 1.943776000  | -4.009031000 |
| C | -2.430280000 | 2.569960000  | -5.874009000 |
| H | -2.795330000 | 1.701254000  | -6.421214000 |
| C | -1.639604000 | 3.527237000  | -6.521831000 |
| H | -1.386005000 | 3.401125000  | -7.576350000 |
| C | -1.169800000 | 4.635492000  | -5.818916000 |
| H | -0.555604000 | 5.384605000  | -6.321377000 |
| C | -1.480790000 | 4.794073000  | -4.465097000 |
| H | -1.105968000 | 5.659089000  | -3.912400000 |
| C | -4.350737000 | 3.540156000  | -1.851601000 |
| C | -4.806472000 | 2.585537000  | -0.935451000 |
| H | -4.093044000 | 2.002050000  | -0.356273000 |
| C | -6.172875000 | 2.368401000  | -0.773498000 |
| H | -6.516308000 | 1.616871000  | -0.061952000 |
| C | -7.085379000 | 3.104404000  | -1.525651000 |
| H | -8.156142000 | 2.937926000  | -1.397696000 |
| C | -6.634196000 | 4.035272000  | -2.469842000 |
| H | -7.348848000 | 4.585556000  | -3.083297000 |
| C | -5.269201000 | 4.244501000  | -2.647094000 |
| H | -4.912918000 | 4.931692000  | -3.418767000 |
| C | -2.194591000 | 5.498675000  | -1.349782000 |
| C | -3.155441000 | 6.513266000  | -1.241811000 |
| H | -4.165671000 | 6.355867000  | -1.621502000 |
| C | -2.830736000 | 7.715438000  | -0.611430000 |
| H | -3.588613000 | 8.494353000  | -0.514013000 |
| C | -1.546098000 | 7.922073000  | -0.105025000 |
| H | -1.300816000 | 8.859214000  | 0.397284000  |
| C | -0.580509000 | 6.922830000  | -0.226427000 |
| H | 0.419577000  | 7.069425000  | 0.183649000  |
| C | -0.906334000 | 5.712289000  | -0.832291000 |
| H | -0.169751000 | 4.906115000  | -0.866324000 |
| C | -1.193024000 | -2.193080000 | -5.503288000 |
| C | -1.004176000 | -2.489266000 | -6.861795000 |
| H | -0.129360000 | -3.050934000 | -7.189487000 |
| C | -1.932350000 | -2.040695000 | -7.800606000 |
| H | -1.785216000 | -2.271412000 | -8.856240000 |
| C | -3.044585000 | -1.296769000 | -7.392904000 |
| H | -3.768392000 | -0.950979000 | -8.132338000 |
| C | -3.228503000 | -0.999103000 | -6.040252000 |
| H | -4.096413000 | -0.433297000 | -5.698665000 |
| C | -2.300679000 | -1.437867000 | -5.098664000 |
| H | -2.455996000 | -1.193074000 | -4.048826000 |
| C | 1.581511000  | -2.974097000 | -5.010997000 |



|   |              |              |              |
|---|--------------|--------------|--------------|
| C | 2.489917000  | -1.910305000 | -4.913295000 |
| H | 2.220299000  | -1.031724000 | -4.324839000 |
| C | 3.717914000  | -1.975693000 | -5.567141000 |
| H | 4.417775000  | -1.142164000 | -5.485514000 |
| C | 4.045568000  | -3.106311000 | -6.320174000 |
| H | 5.005755000  | -3.156763000 | -6.835631000 |
| C | 3.153962000  | -4.180502000 | -6.397388000 |
| H | 3.418006000  | -5.071760000 | -6.967788000 |
| C | 1.926786000  | -4.124066000 | -5.736682000 |
| H | 1.243890000  | -4.974926000 | -5.775864000 |
| C | -0.579689000 | -4.500789000 | -3.837567000 |
| C | -1.576903000 | -5.166260000 | -4.563441000 |
| H | -2.104380000 | -4.660335000 | -5.373394000 |
| C | -1.899544000 | -6.485931000 | -4.239101000 |
| H | -2.678604000 | -7.001862000 | -4.802165000 |
| C | -1.233034000 | -7.140751000 | -3.201402000 |
| H | -1.491050000 | -8.169927000 | -2.951305000 |
| C | -0.243160000 | -6.473914000 | -2.472798000 |
| H | 0.270040000  | -6.970352000 | -1.648213000 |
| C | 0.072357000  | -5.154743000 | -2.780122000 |
| H | 0.825778000  | -4.620225000 | -2.199450000 |
| C | 2.998975000  | -5.086960000 | -0.920247000 |
| C | 3.451308000  | -4.224882000 | -1.931112000 |
| H | 3.357477000  | -3.143287000 | -1.807662000 |
| C | 3.988370000  | -4.747564000 | -3.103575000 |
| H | 4.334052000  | -4.071795000 | -3.884589000 |
| C | 4.055903000  | -6.129680000 | -3.283642000 |
| H | 4.459658000  | -6.537244000 | -4.211455000 |
| C | 3.596773000  | -6.990923000 | -2.284833000 |
| H | 3.643772000  | -8.070858000 | -2.428021000 |
| C | 3.069460000  | -6.473733000 | -1.101550000 |
| H | 2.701291000  | -7.145511000 | -0.323708000 |
| C | 1.119204000  | -5.566581000 | 1.257532000  |
| C | -0.206765000 | -5.541019000 | 0.799455000  |
| H | -0.519504000 | -4.783803000 | 0.078603000  |
| C | -1.126832000 | -6.466996000 | 1.288430000  |
| H | -2.157160000 | -6.445399000 | 0.934810000  |
| C | -0.733025000 | -7.410368000 | 2.237761000  |
| H | -1.461007000 | -8.121501000 | 2.630457000  |
| C | 0.586080000  | -7.433982000 | 2.697666000  |
| H | 0.892437000  | -8.163848000 | 3.447624000  |
| C | 1.513994000  | -6.511387000 | 2.215100000  |
| H | 2.537828000  | -6.510275000 | 2.595159000  |
| C | 3.661358000  | -4.250738000 | 1.793270000  |
| C | 4.886757000  | -4.903593000 | 1.591688000  |
| H | 5.047364000  | -5.506843000 | 0.696160000  |
| C | 5.904722000  | -4.770310000 | 2.538297000  |
| H | 6.862326000  | -5.270797000 | 2.377968000  |
| C | 5.697279000  | -4.001193000 | 3.684881000  |
| H | 6.495449000  | -3.897299000 | 4.422606000  |
| C | 4.470976000  | -3.359733000 | 3.888090000  |
| H | 4.304353000  | -2.755440000 | 4.777879000  |
| C | 3.454205000  | -3.469211000 | 2.942639000  |
| H | 2.508475000  | -2.941680000 | 3.101660000  |
| C | 5.381960000  | 2.391492000  | 0.926975000  |
| C | 5.514547000  | 2.850836000  | -0.394126000 |

|   |              |              |              |
|---|--------------|--------------|--------------|
| H | 5.307298000  | 2.179347000  | -1.230783000 |
| C | 5.931416000  | 4.156362000  | -0.633620000 |
| H | 6.052140000  | 4.497056000  | -1.663042000 |
| C | 6.182474000  | 5.022786000  | 0.436758000  |
| H | 6.501537000  | 6.049499000  | 0.247369000  |
| C | 6.013929000  | 4.577679000  | 1.748139000  |
| H | 6.200379000  | 5.254555000  | 2.584034000  |
| C | 5.620051000  | 3.261775000  | 1.999885000  |
| H | 5.497358000  | 2.912000000  | 3.027238000  |
| C | 5.937584000  | -0.378171000 | 0.223233000  |
| C | 5.500362000  | -1.673075000 | -0.096692000 |
| H | 4.491971000  | -1.989335000 | 0.184423000  |
| C | 6.353697000  | -2.553969000 | -0.756225000 |
| H | 6.005652000  | -3.559330000 | -1.000687000 |
| C | 7.645885000  | -2.147324000 | -1.100430000 |
| H | 8.314492000  | -2.839797000 | -1.614156000 |
| C | 8.079820000  | -0.854555000 | -0.792783000 |
| H | 9.086427000  | -0.533407000 | -1.066106000 |
| C | 7.228914000  | 0.033108000  | -0.135470000 |
| H | 7.564270000  | 1.048854000  | 0.088447000  |
| C | 5.191436000  | 0.297653000  | 2.937706000  |
| C | 6.524023000  | 0.144318000  | 3.352263000  |
| H | 7.341290000  | 0.253221000  | 2.637452000  |
| C | 6.801713000  | -0.161167000 | 4.681271000  |
| H | 7.837776000  | -0.279450000 | 5.002344000  |
| C | 5.755377000  | -0.330017000 | 5.594979000  |
| H | 5.977957000  | -0.587465000 | 6.631933000  |
| C | 4.433812000  | -0.185243000 | 5.179442000  |
| H | 3.603965000  | -0.345701000 | 5.866354000  |
| C | 4.147537000  | 0.135941000  | 3.853409000  |
| H | 3.108778000  | 0.239036000  | 3.539187000  |
| C | 4.233554000  | 1.923783000  | -3.733163000 |
| C | 4.659551000  | 0.657079000  | -3.296228000 |
| H | 3.925239000  | -0.099711000 | -3.010929000 |
| C | 6.016168000  | 0.374573000  | -3.189464000 |
| H | 6.335350000  | -0.609946000 | -2.846044000 |
| C | 6.959075000  | 1.362846000  | -3.484560000 |
| H | 8.023008000  | 1.147560000  | -3.374204000 |
| C | 6.539893000  | 2.626599000  | -3.903303000 |
| H | 7.276432000  | 3.399230000  | -4.129038000 |
| C | 5.178554000  | 2.910050000  | -4.036521000 |
| H | 4.850610000  | 3.897944000  | -4.367179000 |
| C | 1.968289000  | 1.400941000  | -5.434134000 |
| C | 2.910208000  | 1.133412000  | -6.438744000 |
| H | 3.964593000  | 1.370707000  | -6.281207000 |
| C | 2.495714000  | 0.544999000  | -7.633520000 |
| H | 3.228688000  | 0.323012000  | -8.412182000 |
| C | 1.146446000  | 0.240970000  | -7.829245000 |
| H | 0.822793000  | -0.220742000 | -8.763813000 |
| C | 0.208963000  | 0.521559000  | -6.831426000 |
| H | -0.843566000 | 0.290701000  | -6.985534000 |
| C | 0.614672000  | 1.088036000  | -5.626373000 |
| H | -0.116553000 | 1.286559000  | -4.836300000 |
| C | 2.151069000  | 3.966404000  | -4.115953000 |
| C | 2.208911000  | 4.539759000  | -5.393205000 |
| H | 2.417047000  | 3.916541000  | -6.264667000 |

|   |              |              |              |
|---|--------------|--------------|--------------|
| C | 1.973950000  | 5.904622000  | -5.548478000 |
| H | 2.022743000  | 6.350505000  | -6.543129000 |
| C | 1.664146000  | 6.695274000  | -4.439728000 |
| H | 1.467038000  | 7.761440000  | -4.566676000 |
| C | 1.593198000  | 6.122474000  | -3.169554000 |
| H | 1.338600000  | 6.733868000  | -2.303143000 |
| C | 1.832005000  | 4.759994000  | -3.007038000 |
| H | 1.754363000  | 4.297845000  | -2.020171000 |
| N | -3.686909000 | -4.132120000 | 0.982766000  |
| N | -2.709593000 | -3.898649000 | 2.951411000  |
| C | -2.715267000 | -3.445520000 | 1.662763000  |
| C | -4.295545000 | -5.032365000 | 1.839731000  |
| C | -3.670937000 | -4.878053000 | 3.101984000  |
| C | -3.981606000 | -3.923732000 | -0.459763000 |
| H | -3.348633000 | -3.069166000 | -0.739727000 |
| C | -5.438424000 | -3.532592000 | -0.661450000 |
| H | -5.662720000 | -2.595793000 | -0.134436000 |
| H | -6.114383000 | -4.329967000 | -0.321325000 |
| H | -5.602864000 | -3.340844000 | -1.730284000 |
| C | -1.778642000 | -3.386886000 | 3.987977000  |
| C | -0.792345000 | -4.469235000 | 4.400126000  |
| H | -1.227543000 | -2.590422000 | 3.469356000  |
| H | -1.307005000 | -5.298062000 | 4.908618000  |
| H | -0.262563000 | -4.857532000 | 3.519104000  |
| N | -5.269419000 | -5.900931000 | 1.595717000  |
| N | -3.994211000 | -5.583641000 | 4.178887000  |
| C | -5.609890000 | -6.618722000 | 2.692875000  |
| C | -4.993362000 | -6.464154000 | 3.940311000  |
| H | -6.408015000 | -7.350844000 | 2.563263000  |
| H | -5.311039000 | -7.076014000 | 4.785617000  |
| H | -0.052752000 | -4.020184000 | 5.078448000  |
| C | -2.552617000 | -2.776865000 | 5.146806000  |
| H | -3.269669000 | -2.030590000 | 4.780445000  |
| H | -3.098581000 | -3.548579000 | 5.708416000  |
| H | -1.834166000 | -2.280633000 | 5.814336000  |
| C | -3.554742000 | -5.142415000 | -1.266918000 |
| H | -2.483781000 | -5.346621000 | -1.131147000 |
| H | -4.136742000 | -6.030388000 | -0.978337000 |
| H | -3.719723000 | -4.942041000 | -2.335354000 |

278

6 S0

|    |              |              |              |
|----|--------------|--------------|--------------|
| Au | 0.067800000  | 0.042300000  | 0.043300000  |
| Au | -2.061900000 | 0.886500000  | 1.606300000  |
| Au | -2.463500000 | -0.299200000 | -1.140000000 |
| Au | -1.468300000 | -1.951000000 | 1.029300000  |
| Au | 0.602800000  | -0.457100000 | 2.774000000  |
| Au | 0.447300000  | 2.361800000  | 1.449000000  |
| Au | -1.144900000 | 2.228200000  | -1.022400000 |
| Au | 0.053700000  | -1.562200000 | -2.143100000 |
| Au | 1.363900000  | -2.316800000 | 0.370000000  |
| Au | 2.652500000  | 0.391200000  | 0.669800000  |
| Au | 1.433200000  | 1.203900000  | -1.943800000 |
| Cl | -4.434000000 | -0.533500000 | -2.429200000 |
| Cl | 1.019300000  | -0.942800000 | 5.093600000  |
| P  | -3.756800000 | 1.371500000  | 3.069000000  |
| P  | 1.008700000  | 4.156300000  | 2.775500000  |

|   |              |              |              |
|---|--------------|--------------|--------------|
| P | -2.522300000 | 3.788500000  | -2.002000000 |
| P | -0.053400000 | -2.856300000 | -4.062100000 |
| P | 2.364800000  | -4.355500000 | 0.739300000  |
| P | 4.853100000  | 0.713900000  | 1.241800000  |
| P | 2.482600000  | 2.118900000  | -3.789100000 |
| C | -4.852300000 | 2.739300000  | 2.557900000  |
| C | -4.281000000 | 3.810000000  | 1.855100000  |
| H | -3.219900000 | 3.781300000  | 1.604800000  |
| C | -5.073600000 | 4.883600000  | 1.452100000  |
| H | -4.622200000 | 5.701700000  | 0.891600000  |
| C | -6.442600000 | 4.886100000  | 1.727600000  |
| H | -7.065400000 | 5.717300000  | 1.392500000  |
| C | -7.019700000 | 3.811600000  | 2.413100000  |
| H | -8.090700000 | 3.804100000  | 2.617500000  |
| C | -6.228500000 | 2.739400000  | 2.832900000  |
| H | -6.679900000 | 1.898900000  | 3.361900000  |
| C | -3.091400000 | 1.819300000  | 4.713300000  |
| C | -1.992200000 | 1.083000000  | 5.188500000  |
| H | -1.554100000 | 0.285600000  | 4.586200000  |
| C | -1.436800000 | 1.380400000  | 6.430800000  |
| H | -0.580200000 | 0.799200000  | 6.772400000  |
| C | -1.967500000 | 2.420500000  | 7.203400000  |
| H | -1.524400000 | 2.662400000  | 8.171100000  |
| C | -3.057500000 | 3.158200000  | 6.730200000  |
| H | -3.467100000 | 3.975400000  | 7.325600000  |
| C | -3.622900000 | 2.862600000  | 5.485600000  |
| H | -4.463800000 | 3.448500000  | 5.110100000  |
| C | -4.841300000 | -0.074300000 | 3.353400000  |
| C | -5.412700000 | -0.316400000 | 4.613500000  |
| H | -5.213700000 | 0.366800000  | 5.441000000  |
| C | -6.203600000 | -1.449200000 | 4.815200000  |
| H | -6.628600000 | -1.644300000 | 5.800300000  |
| C | -6.434100000 | -2.337500000 | 3.760900000  |
| H | -7.038000000 | -3.231500000 | 3.921000000  |
| C | -5.882100000 | -2.087100000 | 2.499700000  |
| H | -6.071200000 | -2.776900000 | 1.678500000  |
| C | -5.076700000 | -0.965500000 | 2.292600000  |
| H | -4.615100000 | -0.787000000 | 1.317500000  |
| C | 1.909600000  | 5.466800000  | 1.861800000  |
| C | 2.523500000  | 5.147000000  | 0.640500000  |
| H | 2.493800000  | 4.118000000  | 0.271100000  |
| C | 3.164800000  | 6.142900000  | -0.099600000 |
| H | 3.631900000  | 5.888400000  | -1.049600000 |
| C | 3.202600000  | 7.457400000  | 0.375500000  |
| H | 3.695000000  | 8.235100000  | -0.211300000 |
| C | 2.607200000  | 7.776100000  | 1.603100000  |
| H | 2.633700000  | 8.800500000  | 1.977800000  |
| C | 1.959300000  | 6.785000000  | 2.345700000  |
| H | 1.469700000  | 7.034800000  | 3.288900000  |
| C | -0.373900000 | 5.051400000  | 3.576800000  |
| C | -0.385700000 | 5.344800000  | 4.949300000  |
| H | 0.419900000  | 4.991300000  | 5.593900000  |
| C | -1.438400000 | 6.088900000  | 5.490300000  |
| H | -1.448200000 | 6.304700000  | 6.559500000  |
| C | -2.468900000 | 6.554600000  | 4.668000000  |
| H | -3.287800000 | 7.138200000  | 5.091900000  |

|   |              |              |              |
|---|--------------|--------------|--------------|
| C | -2.456200000 | 6.261800000  | 3.300000000  |
| H | -3.259500000 | 6.616100000  | 2.655700000  |
| C | -1.422200000 | 5.499700000  | 2.757000000  |
| H | -1.417900000 | 5.262100000  | 1.692200000  |
| C | 2.078100000  | 3.643500000  | 4.161500000  |
| C | 1.613800000  | 2.581100000  | 4.956600000  |
| H | 0.700100000  | 2.048100000  | 4.688900000  |
| C | 2.324400000  | 2.207100000  | 6.094000000  |
| H | 1.956600000  | 1.375900000  | 6.694900000  |
| C | 3.517100000  | 2.861600000  | 6.424500000  |
| H | 4.082300000  | 2.554400000  | 7.305900000  |
| C | 4.001200000  | 3.891600000  | 5.611000000  |
| H | 4.940300000  | 4.390000000  | 5.856800000  |
| C | 3.280000000  | 4.291600000  | 4.481900000  |
| H | 3.648300000  | 5.101800000  | 3.851100000  |
| C | -2.223100000 | 3.804000000  | -3.804200000 |
| C | -2.639000000 | 2.658500000  | -4.514700000 |
| H | -3.168300000 | 1.851100000  | -3.996400000 |
| C | -2.368200000 | 2.566400000  | -5.879600000 |
| H | -2.687500000 | 1.681900000  | -6.431800000 |
| C | -1.665700000 | 3.589400000  | -6.537900000 |
| H | -1.441700000 | 3.501400000  | -7.604200000 |
| C | -1.245800000 | 4.716600000  | -5.826500000 |
| H | -0.691500000 | 5.511100000  | -6.330500000 |
| C | -1.524900000 | 4.829600000  | -4.457000000 |
| H | -1.192200000 | 5.707600000  | -3.899600000 |
| C | -4.315000000 | 3.477800000  | -1.870100000 |
| C | -4.797800000 | 2.538800000  | -0.950100000 |
| H | -4.099700000 | 1.975300000  | -0.330700000 |
| C | -6.170000000 | 2.304800000  | -0.842300000 |
| H | -6.533300000 | 1.558600000  | -0.135200000 |
| C | -7.063900000 | 3.017500000  | -1.643700000 |
| H | -8.137000000 | 2.837400000  | -1.558300000 |
| C | -6.586900000 | 3.947300000  | -2.579400000 |
| H | -7.283000000 | 4.486700000  | -3.223800000 |
| C | -5.215600000 | 4.168000000  | -2.706000000 |
| H | -4.839000000 | 4.856800000  | -3.465400000 |
| C | -2.213400000 | 5.475100000  | -1.343200000 |
| C | -3.213600000 | 6.458100000  | -1.255600000 |
| H | -4.220900000 | 6.245800000  | -1.614600000 |
| C | -2.928000000 | 7.698200000  | -0.678300000 |
| H | -3.715800000 | 8.449100000  | -0.597800000 |
| C | -1.642000000 | 7.975300000  | -0.200100000 |
| H | -1.425700000 | 8.940800000  | 0.259100000  |
| C | -0.641000000 | 7.002900000  | -0.289200000 |
| H | 0.355900000  | 7.198000000  | 0.107900000  |
| C | -0.929300000 | 5.755100000  | -0.842000000 |
| H | -0.165400000 | 4.975100000  | -0.851500000 |
| C | -1.200100000 | -2.245300000 | -5.358400000 |
| C | -1.082600000 | -2.618400000 | -6.707800000 |
| H | -0.256100000 | -3.250200000 | -7.033800000 |
| C | -2.016900000 | -2.160700000 | -7.639400000 |
| H | -1.919900000 | -2.448600000 | -8.687000000 |
| C | -3.071600000 | -1.332600000 | -7.232100000 |
| H | -3.799600000 | -0.978300000 | -7.964200000 |
| C | -3.188500000 | -0.961500000 | -5.888900000 |

|   |              |              |              |
|---|--------------|--------------|--------------|
| H | -4.009800000 | -0.331700000 | -5.545500000 |
| C | -2.251300000 | -1.410700000 | -4.956700000 |
| H | -2.356300000 | -1.112000000 | -3.914400000 |
| C | 1.567800000  | -3.057200000 | -4.896900000 |
| C | 2.523300000  | -2.041700000 | -4.738900000 |
| H | 2.295400000  | -1.187900000 | -4.096700000 |
| C | 3.748300000  | -2.121200000 | -5.403300000 |
| H | 4.481000000  | -1.322900000 | -5.277400000 |
| C | 4.026500000  | -3.219100000 | -6.225600000 |
| H | 4.983600000  | -3.281700000 | -6.746700000 |
| C | 3.084100000  | -4.245400000 | -6.368600000 |
| H | 3.306300000  | -5.111600000 | -6.993800000 |
| C | 1.858600000  | -4.170700000 | -5.702000000 |
| H | 1.134100000  | -4.982700000 | -5.792500000 |
| C | -0.603900000 | -4.575000000 | -3.724700000 |
| C | -1.552400000 | -5.249300000 | -4.507200000 |
| H | -2.039900000 | -4.739000000 | -5.337900000 |
| C | -1.878600000 | -6.578400000 | -4.215300000 |
| H | -2.622700000 | -7.094200000 | -4.822000000 |
| C | -1.259500000 | -7.240200000 | -3.152600000 |
| H | -1.516400000 | -8.276200000 | -2.928100000 |
| C | -0.326400000 | -6.563400000 | -2.362000000 |
| H | 0.146700000  | -7.062300000 | -1.517900000 |
| C | -0.010500000 | -5.234200000 | -2.637200000 |
| H | 0.706700000  | -4.699800000 | -2.013600000 |
| C | 2.921100000  | -5.185900000 | -0.787000000 |
| C | 3.414900000  | -4.381600000 | -1.827400000 |
| H | 3.386500000  | -3.293600000 | -1.732500000 |
| C | 3.909400000  | -4.972300000 | -2.988700000 |
| H | 4.284800000  | -4.343000000 | -3.795400000 |
| C | 3.889300000  | -6.364600000 | -3.128900000 |
| H | 4.255900000  | -6.822500000 | -4.048900000 |
| C | 3.383000000  | -7.167300000 | -2.101700000 |
| H | 3.356900000  | -8.252000000 | -2.214500000 |
| C | 2.904300000  | -6.581400000 | -0.927000000 |
| H | 2.511900000  | -7.203600000 | -0.120900000 |
| C | 1.262200000  | -5.558400000 | 1.565200000  |
| C | -0.064400000 | -5.685400000 | 1.110600000  |
| H | -0.424900000 | -5.060900000 | 0.289700000  |
| C | -0.918400000 | -6.606600000 | 1.718500000  |
| H | -1.942300000 | -6.719400000 | 1.358500000  |
| C | -0.470800000 | -7.381800000 | 2.795400000  |
| H | -1.151300000 | -8.084000000 | 3.280200000  |
| C | 0.841900000  | -7.243900000 | 3.258000000  |
| H | 1.192000000  | -7.833900000 | 4.106600000  |
| C | 1.710400000  | -6.338100000 | 2.643600000  |
| H | 2.732800000  | -6.224800000 | 3.008700000  |
| C | 3.868900000  | -4.259200000 | 1.769300000  |
| C | 4.961700000  | -5.111100000 | 1.539500000  |
| H | 4.922500000  | -5.847000000 | 0.735200000  |
| C | 6.104400000  | -5.008000000 | 2.334200000  |
| H | 6.954400000  | -5.665300000 | 2.147000000  |
| C | 6.155000000  | -4.061200000 | 3.361700000  |
| H | 7.049800000  | -3.973600000 | 3.980100000  |
| C | 5.065700000  | -3.215600000 | 3.593500000  |
| H | 5.110300000  | -2.474200000 | 4.389400000  |

|   |              |              |              |
|---|--------------|--------------|--------------|
| C | 3.922400000  | -3.302500000 | 2.798300000  |
| H | 3.081500000  | -2.624700000 | 2.972100000  |
| C | 5.435400000  | 2.425200000  | 0.962300000  |
| C | 5.612000000  | 2.878300000  | -0.357500000 |
| H | 5.445300000  | 2.199500000  | -1.195500000 |
| C | 6.022900000  | 4.190100000  | -0.593000000 |
| H | 6.171400000  | 4.525400000  | -1.620600000 |
| C | 6.238000000  | 5.064300000  | 0.479700000  |
| H | 6.557000000  | 6.090800000  | 0.292800000  |
| C | 6.028300000  | 4.624700000  | 1.790500000  |
| H | 6.178800000  | 5.306700000  | 2.628600000  |
| C | 5.628500000  | 3.308100000  | 2.037000000  |
| H | 5.465800000  | 2.968800000  | 3.061400000  |
| C | 5.980200000  | -0.375400000 | 0.286500000  |
| C | 5.492500000  | -1.633100000 | -0.107000000 |
| H | 4.452900000  | -1.898300000 | 0.100000000  |
| C | 6.333000000  | -2.544600000 | -0.748000000 |
| H | 5.944900000  | -3.521900000 | -1.038300000 |
| C | 7.664500000  | -2.202000000 | -1.009500000 |
| H | 8.322700000  | -2.913800000 | -1.511100000 |
| C | 8.150200000  | -0.943700000 | -0.634500000 |
| H | 9.184200000  | -0.669600000 | -0.847400000 |
| C | 7.312600000  | -0.029800000 | 0.010900000  |
| H | 7.687400000  | 0.957100000  | 0.286900000  |
| C | 5.249300000  | 0.360500000  | 3.000300000  |
| C | 6.585500000  | 0.277600000  | 3.433900000  |
| H | 7.403000000  | 0.422100000  | 2.727400000  |
| C | 6.867600000  | 0.000000000  | 4.771600000  |
| H | 7.905200000  | -0.064000000 | 5.102800000  |
| C | 5.822300000  | -0.207500000 | 5.682200000  |
| H | 6.047100000  | -0.441000000 | 6.724700000  |
| C | 4.496200000  | -0.131200000 | 5.250800000  |
| H | 3.666900000  | -0.321800000 | 5.930500000  |
| C | 4.208400000  | 0.162800000  | 3.915100000  |
| H | 3.167000000  | 0.214100000  | 3.593800000  |
| C | 4.291700000  | 1.861800000  | -3.686500000 |
| C | 4.727100000  | 0.597400000  | -3.247700000 |
| H | 3.996900000  | -0.150600000 | -2.932500000 |
| C | 6.087900000  | 0.307200000  | -3.183900000 |
| H | 6.414400000  | -0.673600000 | -2.836800000 |
| C | 7.028100000  | 1.287800000  | -3.522000000 |
| H | 8.093600000  | 1.067400000  | -3.445300000 |
| C | 6.600800000  | 2.553000000  | -3.935700000 |
| H | 7.331700000  | 3.322000000  | -4.189100000 |
| C | 5.234700000  | 2.840600000  | -4.026400000 |
| H | 4.901300000  | 3.826300000  | -4.355100000 |
| C | 2.025200000  | 1.354000000  | -5.380500000 |
| C | 2.963400000  | 1.146400000  | -6.406400000 |
| H | 4.012100000  | 1.405700000  | -6.249700000 |
| C | 2.552400000  | 0.592400000  | -7.620500000 |
| H | 3.283800000  | 0.420000000  | -8.412000000 |
| C | 1.207100000  | 0.259100000  | -7.816500000 |
| H | 0.885500000  | -0.176600000 | -8.764000000 |
| C | 0.274100000  | 0.472200000  | -6.796100000 |
| H | -0.773200000 | 0.213300000  | -6.947700000 |
| C | 0.678600000  | 1.005400000  | -5.572600000 |

|   |              |              |              |
|---|--------------|--------------|--------------|
| H | -0.049100000 | 1.152100000  | -4.769800000 |
| C | 2.225900000  | 3.913100000  | -4.047500000 |
| C | 2.388500000  | 4.502000000  | -5.313300000 |
| H | 2.660100000  | 3.883300000  | -6.172100000 |
| C | 2.172600000  | 5.872600000  | -5.474000000 |
| H | 2.291400000  | 6.324000000  | -6.459100000 |
| C | 1.788600000  | 6.659300000  | -4.379500000 |
| H | 1.606400000  | 7.728400000  | -4.508300000 |
| C | 1.623000000  | 6.073400000  | -3.122800000 |
| H | 1.314400000  | 6.679800000  | -2.271600000 |
| C | 1.835800000  | 4.703200000  | -2.954900000 |
| H | 1.682400000  | 4.234000000  | -1.980700000 |
| N | -2.610600000 | -3.702600000 | 3.200700000  |
| N | -3.395900000 | -4.260600000 | 1.180400000  |
| C | -2.540500000 | -3.431800000 | 1.865600000  |
| C | -3.541200000 | -4.718900000 | 3.460700000  |
| O | -3.814000000 | -5.236000000 | 4.524500000  |
| C | -4.127500000 | -5.061700000 | 2.063800000  |
| O | -5.016700000 | -5.847200000 | 1.809300000  |
| C | -1.706500000 | -3.087400000 | 4.213400000  |
| C | -3.562400000 | -4.217700000 | -0.301400000 |
| H | -2.715700000 | -3.601400000 | -0.642400000 |
| C | -4.863300000 | -3.516800000 | -0.673100000 |
| H | -4.929700000 | -3.426300000 | -1.764400000 |
| H | -4.881700000 | -2.497100000 | -0.278700000 |
| H | -5.729400000 | -4.083100000 | -0.307100000 |
| H | -1.188200000 | -2.296000000 | 3.654600000  |
| C | -0.673500000 | -4.109700000 | 4.675100000  |
| H | -0.111600000 | -4.503800000 | 3.813800000  |
| H | 0.033800000  | -3.608100000 | 5.348500000  |
| H | -1.155000000 | -4.942600000 | 5.205900000  |
| C | -3.435600000 | -5.614200000 | -0.897100000 |
| H | -2.459100000 | -6.054500000 | -0.670200000 |
| H | -4.228200000 | -6.277500000 | -0.529600000 |
| H | -3.511000000 | -5.537800000 | -1.987500000 |
| C | -2.492300000 | -2.449500000 | 5.349600000  |
| H | -3.238300000 | -1.747400000 | 4.961100000  |
| H | -2.999500000 | -3.207000000 | 5.961200000  |
| H | -1.786100000 | -1.893100000 | 5.976700000  |

278

6 T1

|    |              |              |              |
|----|--------------|--------------|--------------|
| Au | -0.010300000 | 0.026600000  | 0.034800000  |
| Au | -2.163200000 | 0.865400000  | 1.497100000  |
| Au | -2.508300000 | -0.380700000 | -1.202900000 |
| Au | -1.636500000 | -1.972000000 | 1.023400000  |
| Au | 0.481900000  | -0.327500000 | 2.786200000  |
| Au | 0.342300000  | 2.299100000  | 1.527900000  |
| Au | -1.289900000 | 2.153400000  | -1.022600000 |
| Au | 0.057000000  | -1.483900000 | -2.185600000 |
| Au | 1.287800000  | -2.282500000 | 0.373400000  |
| Au | 2.568800000  | 0.413100000  | 0.647300000  |
| Au | 1.362700000  | 1.121600000  | -1.981100000 |
| Cl | -4.501300000 | -0.688800000 | -2.416500000 |
| Cl | 0.904800000  | -0.841100000 | 5.074300000  |
| P  | -3.849500000 | 1.295700000  | 2.967100000  |
| P  | 0.976900000  | 4.132900000  | 2.735500000  |



|   |              |              |              |
|---|--------------|--------------|--------------|
| P | -2.514000000 | 3.839500000  | -1.939700000 |
| P | -0.111600000 | -2.768300000 | -4.086100000 |
| P | 2.282100000  | -4.300300000 | 0.763800000  |
| P | 4.752500000  | 0.781600000  | 1.224200000  |
| P | 2.503500000  | 2.079400000  | -3.712500000 |
| C | -5.093000000 | 2.489400000  | 2.380600000  |
| C | -4.639100000 | 3.658600000  | 1.755700000  |
| H | -3.569000000 | 3.809300000  | 1.615800000  |
| C | -5.552400000 | 4.598000000  | 1.295500000  |
| H | -5.197800000 | 5.506200000  | 0.811800000  |
| C | -6.921200000 | 4.356800000  | 1.409800000  |
| H | -7.636800000 | 5.079300000  | 1.016500000  |
| C | -7.375000000 | 3.179800000  | 2.002800000  |
| H | -8.444200000 | 2.982000000  | 2.082500000  |
| C | -6.465300000 | 2.247600000  | 2.500800000  |
| H | -6.819500000 | 1.329700000  | 2.972400000  |
| C | -3.127000000 | 1.974600000  | 4.496300000  |
| C | -2.086100000 | 1.230500000  | 5.073200000  |
| H | -1.747900000 | 0.300600000  | 4.618400000  |
| C | -1.471100000 | 1.681100000  | 6.232900000  |
| H | -0.665000000 | 1.087100000  | 6.663800000  |
| C | -1.874100000 | 2.884100000  | 6.812700000  |
| H | -1.379400000 | 3.247400000  | 7.713500000  |
| C | -2.905300000 | 3.623800000  | 6.237700000  |
| H | -3.225200000 | 4.560400000  | 6.692000000  |
| C | -3.537200000 | 3.175900000  | 5.077700000  |
| H | -4.342600000 | 3.759500000  | 4.629000000  |
| C | -4.731800000 | -0.204200000 | 3.489800000  |
| C | -5.136000000 | -0.376000000 | 4.819700000  |
| H | -4.965000000 | 0.413300000  | 5.552200000  |
| C | -5.705000000 | -1.583600000 | 5.216000000  |
| H | -5.982800000 | -1.731100000 | 6.260200000  |
| C | -5.881200000 | -2.609100000 | 4.289900000  |
| H | -6.282300000 | -3.571300000 | 4.606000000  |
| C | -5.522800000 | -2.420800000 | 2.955000000  |
| H | -5.688200000 | -3.218700000 | 2.235000000  |
| C | -4.934300000 | -1.227400000 | 2.551700000  |
| H | -4.610000000 | -1.093000000 | 1.519300000  |
| C | 1.926200000  | 5.396100000  | 1.819200000  |
| C | 2.540000000  | 5.033400000  | 0.614000000  |
| H | 2.475900000  | 4.000200000  | 0.261800000  |
| C | 3.223400000  | 5.992300000  | -0.128000000 |
| H | 3.685600000  | 5.712000000  | -1.072800000 |
| C | 3.315100000  | 7.303700000  | 0.334600000  |
| H | 3.845900000  | 8.053300000  | -0.255000000 |
| C | 2.727700000  | 7.660900000  | 1.548900000  |
| H | 2.800400000  | 8.686600000  | 1.912300000  |
| C | 2.024400000  | 6.712000000  | 2.288600000  |
| H | 1.528500000  | 7.000100000  | 3.216900000  |
| C | -0.413600000 | 5.054500000  | 3.482400000  |
| C | -0.336600000 | 5.592800000  | 4.773800000  |
| H | 0.539400000  | 5.404300000  | 5.396700000  |
| C | -1.390600000 | 6.361800000  | 5.261900000  |
| H | -1.332900000 | 6.777400000  | 6.269100000  |
| C | -2.521000000 | 6.583700000  | 4.475300000  |
| H | -3.348500000 | 7.177900000  | 4.865300000  |

|   |              |              |              |
|---|--------------|--------------|--------------|
| C | -2.609300000 | 6.023900000  | 3.199900000  |
| H | -3.501200000 | 6.178900000  | 2.593600000  |
| C | -1.561800000 | 5.255700000  | 2.702900000  |
| H | -1.621200000 | 4.816800000  | 1.704400000  |
| C | 2.030800000  | 3.659900000  | 4.143200000  |
| C | 1.557700000  | 2.626900000  | 4.963500000  |
| H | 0.617400000  | 2.128600000  | 4.730900000  |
| C | 2.296900000  | 2.229400000  | 6.069100000  |
| H | 1.923700000  | 1.415300000  | 6.689300000  |
| C | 3.525700000  | 2.829600000  | 6.341200000  |
| H | 4.119500000  | 2.493300000  | 7.191700000  |
| C | 4.008600000  | 3.841200000  | 5.512800000  |
| H | 4.975700000  | 4.299600000  | 5.718500000  |
| C | 3.260000000  | 4.267500000  | 4.416400000  |
| H | 3.636300000  | 5.060400000  | 3.770400000  |
| C | -2.089800000 | 3.939600000  | -3.709700000 |
| C | -2.422200000 | 2.810600000  | -4.481400000 |
| H | -2.994500000 | 1.992700000  | -4.037400000 |
| C | -2.016500000 | 2.742800000  | -5.805700000 |
| H | -2.273300000 | 1.869900000  | -6.405300000 |
| C | -1.263700000 | 3.776900000  | -6.361200000 |
| H | -0.924500000 | 3.704700000  | -7.393500000 |
| C | -0.944900000 | 4.896800000  | -5.597300000 |
| H | -0.371400000 | 5.711300000  | -6.033800000 |
| C | -1.353800000 | 4.984300000  | -4.268100000 |
| H | -1.098800000 | 5.860400000  | -3.669500000 |
| C | -4.308900000 | 3.556700000  | -1.916400000 |
| C | -4.833800000 | 2.515100000  | -1.145000000 |
| H | -4.175400000 | 1.886100000  | -0.550100000 |
| C | -6.201400000 | 2.263800000  | -1.153200000 |
| H | -6.594900000 | 1.432600000  | -0.569700000 |
| C | -7.049400000 | 3.067500000  | -1.908100000 |
| H | -8.123300000 | 2.876100000  | -1.909100000 |
| C | -6.530200000 | 4.106400000  | -2.685900000 |
| H | -7.194400000 | 4.720500000  | -3.295000000 |
| C | -5.159400000 | 4.342300000  | -2.709300000 |
| H | -4.745500000 | 5.117600000  | -3.356600000 |
| C | -2.174700000 | 5.450100000  | -1.152900000 |
| C | -3.175800000 | 6.377500000  | -0.843400000 |
| H | -4.208300000 | 6.184300000  | -1.133600000 |
| C | -2.853900000 | 7.541600000  | -0.147400000 |
| H | -3.641000000 | 8.249300000  | 0.112700000  |
| C | -1.533000000 | 7.803400000  | 0.211400000  |
| H | -1.284700000 | 8.708900000  | 0.765100000  |
| C | -0.530000000 | 6.892100000  | -0.113900000 |
| H | 0.500000000  | 7.088500000  | 0.176600000  |
| C | -0.850400000 | 5.708000000  | -0.765600000 |
| H | -0.083500000 | 4.953900000  | -0.940600000 |
| C | -1.202700000 | -2.078500000 | -5.384700000 |
| C | -1.092300000 | -2.461600000 | -6.727300000 |
| H | -0.297300000 | -3.135900000 | -7.046400000 |
| C | -1.991500000 | -1.959100000 | -7.664600000 |
| H | -1.905600000 | -2.259600000 | -8.709200000 |
| C | -2.998000000 | -1.073900000 | -7.270300000 |
| H | -3.703100000 | -0.687500000 | -8.008000000 |
| C | -3.103900000 | -0.689500000 | -5.934300000 |

|   |              |              |              |
|---|--------------|--------------|--------------|
| H | -3.898000000 | -0.018900000 | -5.604800000 |
| C | -2.204600000 | -1.185200000 | -4.994600000 |
| H | -2.304900000 | -0.885100000 | -3.953800000 |
| C | 1.481300000  | -3.065300000 | -4.937300000 |
| C | 2.470500000  | -2.080000000 | -4.834600000 |
| H | 2.283900000  | -1.197800000 | -4.221500000 |
| C | 3.678100000  | -2.229600000 | -5.509100000 |
| H | 4.447800000  | -1.462000000 | -5.416500000 |
| C | 3.899800000  | -3.361200000 | -6.295600000 |
| H | 4.845200000  | -3.479700000 | -6.827500000 |
| C | 2.921800000  | -4.353500000 | -6.385400000 |
| H | 3.102400000  | -5.247500000 | -6.983400000 |
| C | 1.717000000  | -4.215800000 | -5.698500000 |
| H | 0.968000000  | -5.009800000 | -5.736100000 |
| C | -0.766100000 | -4.445800000 | -3.770700000 |
| C | -1.764900000 | -5.037800000 | -4.556100000 |
| H | -2.236400000 | -4.482400000 | -5.372500000 |
| C | -2.165800000 | -6.346700000 | -4.281800000 |
| H | -2.949200000 | -6.805500000 | -4.889500000 |
| C | -1.579400000 | -7.059000000 | -3.229400000 |
| H | -1.905500000 | -8.077400000 | -3.011100000 |
| C | -0.599800000 | -6.458500000 | -2.433600000 |
| H | -0.158600000 | -7.000800000 | -1.591600000 |
| C | -0.199900000 | -5.153200000 | -2.694000000 |
| H | 0.559200000  | -4.677800000 | -2.069000000 |
| C | 2.711100000  | -5.126700000 | -0.804300000 |
| C | 3.234300000  | -4.333000000 | -1.836400000 |
| H | 3.322200000  | -3.252200000 | -1.703700000 |
| C | 3.603600000  | -4.919900000 | -3.038600000 |
| H | 4.017900000  | -4.303200000 | -3.834200000 |
| C | 3.417800000  | -6.289000000 | -3.234800000 |
| H | 3.679800000  | -6.738600000 | -4.193300000 |
| C | 2.887900000  | -7.077000000 | -2.215500000 |
| H | 2.736500000  | -8.145700000 | -2.371200000 |
| C | 2.547000000  | -6.501900000 | -0.991600000 |
| H | 2.140300000  | -7.117700000 | -0.187100000 |
| C | 1.275400000  | -5.510800000 | 1.672700000  |
| C | -0.061400000 | -5.689400000 | 1.279600000  |
| H | -0.481000000 | -5.097100000 | 0.463900000  |
| C | -0.854600000 | -6.618000000 | 1.947900000  |
| H | -1.895200000 | -6.758100000 | 1.657200000  |
| C | -0.329800000 | -7.349800000 | 3.013700000  |
| H | -0.967800000 | -8.051500000 | 3.553600000  |
| C | 0.997300000  | -7.172700000 | 3.400900000  |
| H | 1.405100000  | -7.739500000 | 4.238300000  |
| C | 1.806400000  | -6.254100000 | 2.731500000  |
| H | 2.841700000  | -6.104000000 | 3.041500000  |
| C | 3.884900000  | -4.144200000 | 1.616500000  |
| C | 4.982200000  | -4.926700000 | 1.235300000  |
| H | 4.871300000  | -5.687400000 | 0.460900000  |
| C | 6.225800000  | -4.708800000 | 1.822800000  |
| H | 7.082600000  | -5.305800000 | 1.507700000  |
| C | 6.372800000  | -3.724800000 | 2.797600000  |
| H | 7.349300000  | -3.543600000 | 3.247200000  |
| C | 5.274600000  | -2.964800000 | 3.197900000  |
| H | 5.391500000  | -2.211000000 | 3.972500000  |

|   |              |              |              |
|---|--------------|--------------|--------------|
| C | 4.030800000  | -3.159100000 | 2.605300000  |
| H | 3.181400000  | -2.536600000 | 2.900100000  |
| C | 5.353900000  | 2.481300000  | 0.955500000  |
| C | 5.602500000  | 2.914900000  | -0.353400000 |
| H | 5.476100000  | 2.222100000  | -1.183500000 |
| C | 6.034100000  | 4.216400000  | -0.582600000 |
| H | 6.245000000  | 4.541000000  | -1.601700000 |
| C | 6.186300000  | 5.103000000  | 0.484900000  |
| H | 6.511700000  | 6.128000000  | 0.303500000  |
| C | 5.902700000  | 4.683700000  | 1.783100000  |
| H | 6.007600000  | 5.379200000  | 2.615800000  |
| C | 5.493500000  | 3.373700000  | 2.025100000  |
| H | 5.285100000  | 3.042000000  | 3.042600000  |
| C | 5.907300000  | -0.305600000 | 0.303300000  |
| C | 5.424000000  | -1.552300000 | -0.119800000 |
| H | 4.371200000  | -1.797900000 | 0.024800000  |
| C | 6.283300000  | -2.469500000 | -0.717500000 |
| H | 5.898200000  | -3.437000000 | -1.041400000 |
| C | 7.629100000  | -2.147300000 | -0.896600000 |
| H | 8.304900000  | -2.869800000 | -1.356400000 |
| C | 8.106900000  | -0.896600000 | -0.503400000 |
| H | 9.154300000  | -0.638100000 | -0.661800000 |
| C | 7.249400000  | 0.027700000  | 0.091300000  |
| H | 7.622500000  | 1.013400000  | 0.373400000  |
| C | 5.129100000  | 0.449900000  | 2.985400000  |
| C | 6.455400000  | 0.418700000  | 3.438800000  |
| H | 7.279200000  | 0.610000000  | 2.752900000  |
| C | 6.725000000  | 0.126300000  | 4.771400000  |
| H | 7.757600000  | 0.100700000  | 5.120900000  |
| C | 5.678300000  | -0.157800000 | 5.651900000  |
| H | 5.896200000  | -0.418800000 | 6.688600000  |
| C | 4.362100000  | -0.128200000 | 5.201400000  |
| H | 3.531100000  | -0.375400000 | 5.860900000  |
| C | 4.083900000  | 0.192800000  | 3.874500000  |
| H | 3.047100000  | 0.217600000  | 3.540500000  |
| C | 4.302300000  | 1.825800000  | -3.544100000 |
| C | 4.724200000  | 0.546900000  | -3.146400000 |
| H | 3.988900000  | -0.216000000 | -2.882100000 |
| C | 6.080100000  | 0.259400000  | -3.064100000 |
| H | 6.401500000  | -0.734800000 | -2.756600000 |
| C | 7.023400000  | 1.250200000  | -3.340900000 |
| H | 8.086100000  | 1.026400000  | -3.245400000 |
| C | 6.607000000  | 2.525700000  | -3.717800000 |
| H | 7.344000000  | 3.302000000  | -3.925100000 |
| C | 5.246900000  | 2.816300000  | -3.828500000 |
| H | 4.923300000  | 3.814300000  | -4.127700000 |
| C | 2.125100000  | 1.294600000  | -5.309600000 |
| C | 3.115300000  | 0.997300000  | -6.253100000 |
| H | 4.162300000  | 1.221100000  | -6.042000000 |
| C | 2.760400000  | 0.385800000  | -7.453200000 |
| H | 3.534300000  | 0.127300000  | -8.176900000 |
| C | 1.422800000  | 0.100500000  | -7.722500000 |
| H | 1.146800000  | -0.383800000 | -8.659600000 |
| C | 0.436900000  | 0.423800000  | -6.791200000 |
| H | -0.607700000 | 0.214500000  | -7.008400000 |
| C | 0.783100000  | 0.996100000  | -5.574600000 |

|   |              |              |              |
|---|--------------|--------------|--------------|
| H | 0.015300000  | 1.207200000  | -4.827200000 |
| C | 2.264600000  | 3.864300000  | -4.000700000 |
| C | 2.491500000  | 4.438200000  | -5.256700000 |
| H | 2.764800000  | 3.808900000  | -6.103000000 |
| C | 2.352300000  | 5.813400000  | -5.421600000 |
| H | 2.535200000  | 6.261900000  | -6.397100000 |
| C | 1.965900000  | 6.613000000  | -4.348000000 |
| H | 1.844300000  | 7.688200000  | -4.485500000 |
| C | 1.708200000  | 6.037600000  | -3.106200000 |
| H | 1.382200000  | 6.659000000  | -2.273400000 |
| C | 1.857600000  | 4.664600000  | -2.930900000 |
| H | 1.651800000  | 4.198100000  | -1.966800000 |
| N | -2.368700000 | -3.899900000 | 3.233700000  |
| N | -3.305500000 | -4.411400000 | 1.311000000  |
| C | -2.380500000 | -3.612900000 | 1.910300000  |
| C | -3.333000000 | -4.879000000 | 3.560700000  |
| O | -3.559100000 | -5.322000000 | 4.689200000  |
| C | -3.988700000 | -5.206300000 | 2.262000000  |
| O | -4.935300000 | -5.962600000 | 2.022400000  |
| C | -1.490100000 | -3.244600000 | 4.224200000  |
| C | -3.610300000 | -4.382700000 | -0.135500000 |
| H | -2.799200000 | -3.778100000 | -0.573100000 |
| C | -4.934000000 | -3.687300000 | -0.399900000 |
| H | -5.107300000 | -3.621900000 | -1.480800000 |
| H | -4.913700000 | -2.659600000 | -0.024600000 |
| H | -5.758500000 | -4.244100000 | 0.068500000  |
| H | -0.882000000 | -2.550000000 | 3.628800000  |
| C | -0.561200000 | -4.251200000 | 4.879500000  |
| H | 0.068000000  | -4.737300000 | 4.117900000  |
| H | 0.096300000  | -3.713800000 | 5.585200000  |
| H | -1.139200000 | -5.017300000 | 5.418800000  |
| C | -3.540600000 | -5.787200000 | -0.718100000 |
| H | -2.552400000 | -6.225800000 | -0.548000000 |
| H | -4.303100000 | -6.437000000 | -0.273900000 |
| H | -3.702100000 | -5.727800000 | -1.800000000 |
| C | -2.320000000 | -2.444000000 | 5.215200000  |
| H | -2.941700000 | -1.723700000 | 4.680100000  |
| H | -2.976600000 | -3.106600000 | 5.797900000  |
| H | -1.645600000 | -1.902600000 | 5.891700000  |

278

6 S1

|    |              |              |              |
|----|--------------|--------------|--------------|
| Au | -0.010609000 | 0.011760000  | 0.068554000  |
| Au | -2.243490000 | 0.750994000  | 1.451894000  |
| Au | -2.459709000 | -0.425881000 | -1.318254000 |
| Au | -1.654911000 | -2.023600000 | 0.822609000  |
| Au | 0.785972000  | -0.229213000 | 2.789667000  |
| Au | 0.284823000  | 2.304025000  | 1.574033000  |
| Au | -1.342190000 | 2.213759000  | -0.845723000 |
| Au | 0.070249000  | -1.475908000 | -2.227569000 |
| Au | 1.323088000  | -2.313397000 | 0.201659000  |
| Au | 2.634746000  | 0.323100000  | 0.667108000  |
| Au | 1.445473000  | 1.192535000  | -1.835151000 |
| Cl | -4.333876000 | -0.299403000 | -2.748701000 |
| Cl | 1.093347000  | -1.005739000 | 5.002569000  |
| P  | -3.768767000 | 1.292166000  | 3.036606000  |
| P  | 1.008070000  | 4.121131000  | 2.764758000  |

|   |              |              |              |
|---|--------------|--------------|--------------|
| P | -2.600135000 | 3.727746000  | -2.005052000 |
| P | 0.032930000  | -2.774058000 | -4.129099000 |
| P | 2.241430000  | -4.347317000 | 0.654817000  |
| P | 4.832670000  | 0.642125000  | 1.263403000  |
| P | 2.470735000  | 2.166995000  | -3.612614000 |
| C | -4.888724000 | 2.626125000  | 2.498807000  |
| C | -4.324313000 | 3.691985000  | 1.783787000  |
| H | -3.257448000 | 3.675751000  | 1.559264000  |
| C | -5.128613000 | 4.723179000  | 1.315204000  |
| H | -4.681475000 | 5.536029000  | 0.741118000  |
| C | -6.506683000 | 4.682938000  | 1.532715000  |
| H | -7.143757000 | 5.474137000  | 1.136463000  |
| C | -7.074340000 | 3.614647000  | 2.227390000  |
| H | -8.153356000 | 3.574461000  | 2.382656000  |
| C | -6.269788000 | 2.585917000  | 2.719301000  |
| H | -6.715150000 | 1.745453000  | 3.255143000  |
| C | -2.914360000 | 1.881495000  | 4.533010000  |
| C | -1.906841000 | 1.053203000  | 5.049861000  |
| H | -1.650366000 | 0.117591000  | 4.557104000  |
| C | -1.217123000 | 1.431738000  | 6.192581000  |
| H | -0.435382000 | 0.774601000  | 6.572500000  |
| C | -1.508484000 | 2.646931000  | 6.811540000  |
| H | -0.950993000 | 2.952482000  | 7.696604000  |
| C | -2.502142000 | 3.475162000  | 6.292822000  |
| H | -2.730866000 | 4.424027000  | 6.775973000  |
| C | -3.209333000 | 3.099438000  | 5.151263000  |
| H | -3.981906000 | 3.753347000  | 4.743272000  |
| C | -4.764320000 | -0.130020000 | 3.581875000  |
| C | -5.188429000 | -0.257573000 | 4.911007000  |
| H | -4.970214000 | 0.529035000  | 5.634227000  |
| C | -5.833751000 | -1.424744000 | 5.319196000  |
| H | -6.133200000 | -1.540873000 | 6.361471000  |
| C | -6.066059000 | -2.452373000 | 4.407239000  |
| H | -6.534792000 | -3.381181000 | 4.734356000  |
| C | -5.677044000 | -2.309889000 | 3.074170000  |
| H | -5.878540000 | -3.109241000 | 2.363839000  |
| C | -5.013021000 | -1.158529000 | 2.661024000  |
| H | -4.649340000 | -1.068448000 | 1.636707000  |
| C | 1.908034000  | 5.369143000  | 1.779144000  |
| C | 2.516399000  | 4.972501000  | 0.581368000  |
| H | 2.476772000  | 3.925124000  | 0.270599000  |
| C | 3.161994000  | 5.918089000  | -0.209508000 |
| H | 3.614635000  | 5.612586000  | -1.150677000 |
| C | 3.218011000  | 7.250750000  | 0.191065000  |
| H | 3.714644000  | 7.988547000  | -0.440924000 |
| C | 2.636461000  | 7.643198000  | 1.396694000  |
| H | 2.682142000  | 8.685142000  | 1.714780000  |
| C | 1.974620000  | 6.707218000  | 2.188972000  |
| H | 1.487191000  | 7.020623000  | 3.113120000  |
| C | -0.310207000 | 5.077843000  | 3.596468000  |
| C | -0.154198000 | 5.600827000  | 4.885277000  |
| H | 0.752839000  | 5.396039000  | 5.455098000  |
| C | -1.167965000 | 6.378499000  | 5.441768000  |
| H | -1.044756000 | 6.785290000  | 6.446155000  |
| C | -2.337928000 | 6.624227000  | 4.726386000  |
| H | -3.132750000 | 7.226062000  | 5.170087000  |

|   |              |              |              |
|---|--------------|--------------|--------------|
| C | -2.501323000 | 6.088259000  | 3.449214000  |
| H | -3.422493000 | 6.261640000  | 2.895922000  |
| C | -1.490996000 | 5.316264000  | 2.884978000  |
| H | -1.606988000 | 4.900324000  | 1.884462000  |
| C | 2.119852000  | 3.666831000  | 4.131279000  |
| C | 1.660088000  | 2.659650000  | 4.991054000  |
| H | 0.724675000  | 2.144107000  | 4.775420000  |
| C | 2.395746000  | 2.325724000  | 6.119284000  |
| H | 2.026496000  | 1.541302000  | 6.780309000  |
| C | 3.614876000  | 2.958135000  | 6.370571000  |
| H | 4.208209000  | 2.674672000  | 7.240662000  |
| C | 4.089776000  | 3.935571000  | 5.495762000  |
| H | 5.049224000  | 4.418735000  | 5.687066000  |
| C | 3.338942000  | 4.303812000  | 4.379399000  |
| H | 3.700687000  | 5.077777000  | 3.701398000  |
| C | -2.211521000 | 3.722633000  | -3.782144000 |
| C | -2.614771000 | 2.593044000  | -4.516849000 |
| H | -3.202428000 | 1.803632000  | -4.039848000 |
| C | -2.261911000 | 2.494465000  | -5.857131000 |
| H | -2.583392000 | 1.627901000  | -6.433160000 |
| C | -1.484468000 | 3.484586000  | -6.460490000 |
| H | -1.185196000 | 3.380400000  | -7.504609000 |
| C | -1.085752000 | 4.599581000  | -5.727125000 |
| H | -0.489026000 | 5.380314000  | -6.196660000 |
| C | -1.456362000 | 4.728589000  | -4.388395000 |
| H | -1.160537000 | 5.610338000  | -3.819464000 |
| C | -4.390715000 | 3.408209000  | -1.943686000 |
| C | -4.900825000 | 2.494505000  | -1.017047000 |
| H | -4.225216000 | 1.936750000  | -0.373170000 |
| C | -6.271677000 | 2.279032000  | -0.932457000 |
| H | -6.658938000 | 1.561635000  | -0.209522000 |
| C | -7.136395000 | 2.968195000  | -1.776807000 |
| H | -8.211852000 | 2.797985000  | -1.711701000 |
| C | -6.629276000 | 3.852085000  | -2.733029000 |
| H | -7.304566000 | 4.362065000  | -3.419550000 |
| C | -5.257640000 | 4.066511000  | -2.827922000 |
| H | -4.857554000 | 4.718110000  | -3.606357000 |
| C | -2.315204000 | 5.419590000  | -1.355969000 |
| C | -3.269636000 | 6.441167000  | -1.443577000 |
| H | -4.225172000 | 6.262350000  | -1.936018000 |
| C | -3.013825000 | 7.684158000  | -0.865695000 |
| H | -3.767471000 | 8.470494000  | -0.925704000 |
| C | -1.805035000 | 7.921356000  | -0.209687000 |
| H | -1.614002000 | 8.891207000  | 0.251389000  |
| C | -0.848587000 | 6.910311000  | -0.126075000 |
| H | 0.089595000  | 7.080153000  | 0.401853000  |
| C | -1.106500000 | 5.662688000  | -0.685607000 |
| H | -0.380720000 | 4.855305000  | -0.569722000 |
| C | -1.017338000 | -2.179551000 | -5.502075000 |
| C | -0.759931000 | -2.489988000 | -6.843238000 |
| H | 0.134261000  | -3.048298000 | -7.121394000 |
| C | -1.640557000 | -2.056039000 | -7.832352000 |
| H | -1.439132000 | -2.295324000 | -8.877851000 |
| C | -2.777595000 | -1.319238000 | -7.490037000 |
| H | -3.465756000 | -0.987716000 | -8.269818000 |
| C | -3.033034000 | -1.012959000 | -6.152286000 |

|   |              |              |              |
|---|--------------|--------------|--------------|
| H | -3.921490000 | -0.452722000 | -5.857547000 |
| C | -2.151034000 | -1.435702000 | -5.161603000 |
| H | -2.366210000 | -1.187955000 | -4.122634000 |
| C | 1.674085000  | -3.051947000 | -4.884205000 |
| C | 2.627896000  | -2.036464000 | -4.754613000 |
| H | 2.388764000  | -1.152853000 | -4.162230000 |
| C | 3.859479000  | -2.149795000 | -5.392854000 |
| H | 4.598309000  | -1.354554000 | -5.285641000 |
| C | 4.138332000  | -3.273699000 | -6.171090000 |
| H | 5.098900000  | -3.358985000 | -6.681716000 |
| C | 3.196611000  | -4.298692000 | -6.282954000 |
| H | 3.423313000  | -5.186646000 | -6.874360000 |
| C | 1.969055000  | -4.198567000 | -5.630731000 |
| H | 1.243082000  | -5.011691000 | -5.693117000 |
| C | -0.622331000 | -4.447241000 | -3.776553000 |
| C | -1.645171000 | -5.032066000 | -4.529616000 |
| H | -2.099912000 | -4.491434000 | -5.360484000 |
| C | -2.089640000 | -6.315158000 | -4.207997000 |
| H | -2.889913000 | -6.767391000 | -4.793112000 |
| C | -1.521511000 | -7.011965000 | -3.143769000 |
| H | -1.879406000 | -8.010578000 | -2.891378000 |
| C | -0.511240000 | -6.422554000 | -2.383896000 |
| H | -0.079139000 | -6.954253000 | -1.536111000 |
| C | -0.069132000 | -5.141958000 | -2.691822000 |
| H | 0.713692000  | -4.673141000 | -2.098457000 |
| C | 2.837869000  | -5.178473000 | -0.847302000 |
| C | 3.428078000  | -4.384603000 | -1.842852000 |
| H | 3.496764000  | -3.302306000 | -1.709960000 |
| C | 3.884251000  | -4.972544000 | -3.014000000 |
| H | 4.343801000  | -4.352938000 | -3.783015000 |
| C | 3.722151000  | -6.344795000 | -3.215465000 |
| H | 4.050729000  | -6.797282000 | -4.151919000 |
| C | 3.131088000  | -7.134680000 | -2.230319000 |
| H | 3.002039000  | -8.205970000 | -2.389572000 |
| C | 2.698627000  | -6.556927000 | -1.037511000 |
| H | 2.236375000  | -7.171517000 | -0.262948000 |
| C | 1.130239000  | -5.527888000 | 1.470709000  |
| C | -0.202838000 | -5.605634000 | 1.035443000  |
| H | -0.560956000 | -4.950857000 | 0.240106000  |
| C | -1.071007000 | -6.506634000 | 1.646056000  |
| H | -2.107067000 | -6.574037000 | 1.317948000  |
| C | -0.626633000 | -7.304841000 | 2.699427000  |
| H | -1.326123000 | -7.978236000 | 3.195955000  |
| C | 0.697204000  | -7.226237000 | 3.131028000  |
| H | 1.041315000  | -7.843420000 | 3.961127000  |
| C | 1.581670000  | -6.341514000 | 2.516902000  |
| H | 2.613168000  | -6.263951000 | 2.864473000  |
| C | 3.707846000  | -4.160972000 | 1.711253000  |
| C | 4.935918000  | -4.746766000 | 1.386639000  |
| H | 5.021422000  | -5.395831000 | 0.513799000  |
| C | 6.055548000  | -4.480307000 | 2.173763000  |
| H | 7.018760000  | -4.917371000 | 1.909014000  |
| C | 5.940087000  | -3.658806000 | 3.292738000  |
| H | 6.815385000  | -3.448374000 | 3.908005000  |
| C | 4.706759000  | -3.098278000 | 3.630520000  |
| H | 4.609762000  | -2.468815000 | 4.512628000  |



|   |              |              |              |
|---|--------------|--------------|--------------|
| C | 3.591718000  | -3.327293000 | 2.835773000  |
| H | 2.640581000  | -2.852575000 | 3.089368000  |
| C | 5.390446000  | 2.367900000  | 1.070197000  |
| C | 5.522120000  | 2.887704000  | -0.225771000 |
| H | 5.333328000  | 2.247364000  | -1.086103000 |
| C | 5.911715000  | 4.208630000  | -0.406159000 |
| H | 6.033817000  | 4.598237000  | -1.417112000 |
| C | 6.129260000  | 5.033650000  | 0.699045000  |
| H | 6.412998000  | 6.077006000  | 0.555477000  |
| C | 5.970928000  | 4.525253000  | 1.986123000  |
| H | 6.140253000  | 5.167044000  | 2.850818000  |
| C | 5.612545000  | 3.191104000  | 2.178975000  |
| H | 5.504125000  | 2.793632000  | 3.188990000  |
| C | 5.998896000  | -0.371134000 | 0.283086000  |
| C | 5.570614000  | -1.648962000 | -0.102669000 |
| H | 4.553587000  | -1.971640000 | 0.131284000  |
| C | 6.445641000  | -2.506990000 | -0.762975000 |
| H | 6.105855000  | -3.499723000 | -1.060112000 |
| C | 7.752013000  | -2.096619000 | -1.035958000 |
| H | 8.439170000  | -2.771670000 | -1.548270000 |
| C | 8.178515000  | -0.821735000 | -0.658565000 |
| H | 9.198280000  | -0.499687000 | -0.873961000 |
| C | 7.304441000  | 0.045168000  | -0.004871000 |
| H | 7.636129000  | 1.044617000  | 0.281623000  |
| C | 5.242980000  | 0.224146000  | 2.997979000  |
| C | 6.536976000  | -0.179231000 | 3.356554000  |
| H | 7.316031000  | -0.279741000 | 2.601221000  |
| C | 6.824847000  | -0.481779000 | 4.683641000  |
| H | 7.833025000  | -0.793574000 | 4.959104000  |
| C | 5.822227000  | -0.410095000 | 5.652609000  |
| H | 6.043649000  | -0.681097000 | 6.686250000  |
| C | 4.533428000  | -0.023354000 | 5.292676000  |
| H | 3.727823000  | -0.021293000 | 6.024285000  |
| C | 4.243366000  | 0.310093000  | 3.972320000  |
| H | 3.229620000  | 0.608966000  | 3.703716000  |
| C | 4.277281000  | 1.960069000  | -3.475523000 |
| C | 4.731511000  | 0.676207000  | -3.125303000 |
| H | 4.015905000  | -0.113153000 | -2.884531000 |
| C | 6.093130000  | 0.416128000  | -3.056274000 |
| H | 6.436855000  | -0.582624000 | -2.786793000 |
| C | 7.012166000  | 1.439927000  | -3.297760000 |
| H | 8.081079000  | 1.239362000  | -3.216640000 |
| C | 6.564588000  | 2.719139000  | -3.625133000 |
| H | 7.283655000  | 3.519023000  | -3.807613000 |
| C | 5.197219000  | 2.982648000  | -3.724420000 |
| H | 4.848997000  | 3.982524000  | -3.990385000 |
| C | 2.082422000  | 1.360585000  | -5.194503000 |
| C | 3.069158000  | 1.043306000  | -6.136167000 |
| H | 4.118941000  | 1.261087000  | -5.930994000 |
| C | 2.705774000  | 0.421531000  | -7.328906000 |
| H | 3.475357000  | 0.147198000  | -8.051824000 |
| C | 1.364343000  | 0.145888000  | -7.590330000 |
| H | 1.078483000  | -0.346172000 | -8.520551000 |
| C | 0.382656000  | 0.490818000  | -6.662130000 |
| H | -0.664974000 | 0.288834000  | -6.874871000 |
| C | 0.734948000  | 1.075807000  | -5.453324000 |

|   |              |              |              |
|---|--------------|--------------|--------------|
| H | -0.032277000 | 1.313905000  | -4.712524000 |
| C | 2.139011000  | 3.935480000  | -3.899837000 |
| C | 2.385478000  | 4.519671000  | -5.149511000 |
| H | 2.745745000  | 3.907839000  | -5.977807000 |
| C | 2.148147000  | 5.878980000  | -5.331733000 |
| H | 2.340838000  | 6.335283000  | -6.302888000 |
| C | 1.654395000  | 6.653030000  | -4.279204000 |
| H | 1.462031000  | 7.716323000  | -4.428124000 |
| C | 1.387198000  | 6.066943000  | -3.044443000 |
| H | 0.983265000  | 6.665797000  | -2.228430000 |
| C | 1.618879000  | 4.706582000  | -2.855616000 |
| H | 1.388409000  | 4.232258000  | -1.901388000 |
| N | -2.544466000 | -3.793820000 | 3.117221000  |
| N | -3.531130000 | -4.276408000 | 1.202604000  |
| C | -2.573403000 | -3.504921000 | 1.794159000  |
| C | -3.486019000 | -4.794698000 | 3.446186000  |
| O | -3.668535000 | -5.287292000 | 4.556080000  |
| C | -4.186204000 | -5.090616000 | 2.149142000  |
| O | -5.132021000 | -5.846797000 | 1.922803000  |
| C | -1.608393000 | -3.175335000 | 4.079645000  |
| C | -3.873823000 | -4.195192000 | -0.234451000 |
| H | -3.085238000 | -3.556133000 | -0.664959000 |
| C | -5.213859000 | -3.498787000 | -0.427952000 |
| H | -5.406750000 | -3.362341000 | -1.501250000 |
| H | -5.195190000 | -2.499263000 | 0.028376000  |
| H | -6.026612000 | -4.094858000 | 0.013356000  |
| H | -1.098789000 | -2.391608000 | 3.499020000  |
| C | -0.577928000 | -4.194774000 | 4.539367000  |
| H | -0.003774000 | -4.561690000 | 3.679586000  |
| H | 0.116994000  | -3.712692000 | 5.240751000  |
| H | -1.072828000 | -5.044152000 | 5.033249000  |
| C | -3.798933000 | -5.569510000 | -0.891101000 |
| H | -2.792622000 | -5.994833000 | -0.780641000 |
| H | -4.536484000 | -6.256325000 | -0.453056000 |
| H | -3.995053000 | -5.464244000 | -1.967684000 |
| C | -2.368178000 | -2.526341000 | 5.226258000  |
| H | -3.104591000 | -1.811097000 | 4.840351000  |
| H | -2.894860000 | -3.283211000 | 5.823518000  |
| H | -1.651537000 | -1.990159000 | 5.864763000  |

279

2-NHC-S0

|    |              |              |              |
|----|--------------|--------------|--------------|
| Au | 0.000000000  | 0.000000000  | 0.000000000  |
| Au | -2.051216000 | 0.736067000  | 1.591672000  |
| Au | -2.471405000 | -0.484377000 | -1.010120000 |
| Au | -1.432381000 | -2.059620000 | 1.108040000  |
| Au | 0.536094000  | -0.483366000 | 2.584389000  |
| Au | 0.398394000  | 2.248296000  | 1.453491000  |
| Au | -1.200255000 | 2.120582000  | -1.068821000 |
| Au | -0.039886000 | -1.573482000 | -2.138680000 |
| Au | 1.282265000  | -2.292271000 | 0.439476000  |
| Au | 2.570600000  | 0.452987000  | 0.578175000  |
| Au | 1.366311000  | 1.101929000  | -1.972707000 |
| Cl | -4.593970000 | -0.920518000 | -1.979201000 |
| Cl | 1.077988000  | -1.065655000 | 4.797613000  |
| P  | -3.755995000 | 1.264777000  | 3.021007000  |
| P  | -2.357928000 | 3.796837000  | -2.103355000 |

|   |              |              |              |
|---|--------------|--------------|--------------|
| P | -0.275861000 | -2.776516000 | -4.069829000 |
| P | 2.353095000  | -4.264254000 | 0.841809000  |
| P | 4.777379000  | 0.834038000  | 1.063885000  |
| P | 2.504442000  | 2.022229000  | -3.721780000 |
| C | -4.908453000 | 2.524347000  | 2.434520000  |
| C | -4.358800000 | 3.652274000  | 1.837124000  |
| H | -3.417909000 | 3.720981000  | 1.726943000  |
| C | -5.187139000 | 4.681562000  | 1.403362000  |
| H | -4.811241000 | 5.452633000  | 0.995106000  |
| C | -6.563162000 | 4.582051000  | 1.564399000  |
| H | -7.129102000 | 5.284142000  | 1.268376000  |
| C | -7.112749000 | 3.452435000  | 2.161796000  |
| H | -8.053663000 | 3.383981000  | 2.273483000  |
| C | -6.284746000 | 2.424020000  | 2.598155000  |
| H | -6.660348000 | 1.652304000  | 3.005345000  |
| C | -3.171224000 | 1.840411000  | 4.624108000  |
| C | -2.078172000 | 1.199252000  | 5.192933000  |
| H | -1.661691000 | 0.475568000  | 4.738964000  |
| C | -1.592871000 | 1.615625000  | 6.426687000  |
| H | -0.845474000 | 1.176081000  | 6.817124000  |
| C | -2.200621000 | 2.673157000  | 7.091615000  |
| H | -1.869397000 | 2.957947000  | 7.936100000  |
| C | -3.293738000 | 3.316004000  | 6.522790000  |
| H | -3.709520000 | 4.039360000  | 6.976889000  |
| C | -3.779040000 | 2.899631000  | 5.289036000  |
| H | -4.525752000 | 3.338889000  | 4.898702000  |
| C | -4.804252000 | -0.144897000 | 3.424120000  |
| C | -5.371086000 | -0.285387000 | 4.683848000  |
| H | -5.167495000 | 0.340221000  | 5.369581000  |
| C | -6.233730000 | -1.345281000 | 4.946183000  |
| H | -6.620619000 | -1.440811000 | 5.807628000  |
| C | -6.530696000 | -2.261367000 | 3.943595000  |
| H | -7.120905000 | -2.984487000 | 4.121697000  |
| C | -5.965224000 | -2.120062000 | 2.681271000  |
| H | -6.168043000 | -2.747131000 | 1.997667000  |
| C | -5.101153000 | -1.062671000 | 2.421533000  |
| H | -4.714883000 | -0.966108000 | 1.559594000  |
| C | -2.034416000 | 4.027537000  | -3.897882000 |
| C | -2.386206000 | 2.974855000  | -4.734237000 |
| H | -2.719842000 | 2.165487000  | -4.365982000 |
| C | -2.250682000 | 3.105576000  | -6.113444000 |
| H | -2.491262000 | 2.386309000  | -6.684321000 |
| C | -1.763704000 | 4.289853000  | -6.653698000 |
| H | -1.670327000 | 4.379614000  | -7.594494000 |
| C | -1.411915000 | 5.342535000  | -5.817343000 |
| H | -1.077957000 | 6.152114000  | -6.186326000 |
| C | -1.547168000 | 5.212630000  | -4.440734000 |
| H | -1.306525000 | 5.931319000  | -3.867961000 |
| C | -4.168425000 | 3.524984000  | -2.022577000 |
| C | -4.672696000 | 2.506545000  | -1.219988000 |
| H | -4.079771000 | 1.951706000  | -0.729084000 |
| C | -6.045046000 | 2.300618000  | -1.139469000 |
| H | -6.389932000 | 1.605094000  | -0.592800000 |
| C | -6.913124000 | 3.113130000  | -1.861540000 |
| H | -7.851695000 | 2.972274000  | -1.805073000 |
| C | -6.409123000 | 4.130753000  | -2.661531000 |

|   |              |              |              |
|---|--------------|--------------|--------------|
| H | -7.003313000 | 4.686110000  | -3.153656000 |
| C | -5.038405000 | 4.336680000  | -2.742050000 |
| H | -4.693147000 | 5.032739000  | -3.289993000 |
| C | -1.990629000 | 5.411432000  | -1.362844000 |
| C | -2.958667000 | 6.383892000  | -1.136872000 |
| H | -3.866847000 | 6.209375000  | -1.355909000 |
| C | -2.597509000 | 7.611434000  | -0.594020000 |
| H | -3.259934000 | 8.274645000  | -0.438360000 |
| C | -1.270216000 | 7.865701000  | -0.274543000 |
| H | -1.023332000 | 8.704434000  | 0.098674000  |
| C | -0.302243000 | 6.894929000  | -0.500515000 |
| H | 0.606405000  | 7.068986000  | -0.281842000 |
| C | -0.661498000 | 5.668202000  | -1.045964000 |
| H | -0.000474000 | 5.003682000  | -1.199391000 |
| C | -1.352079000 | -1.979252000 | -5.313452000 |
| C | -1.239724000 | -2.232426000 | -6.674477000 |
| H | -0.543771000 | -2.791889000 | -6.998110000 |
| C | -2.145669000 | -1.664067000 | -7.565377000 |
| H | -2.068319000 | -1.837962000 | -8.495238000 |
| C | -3.162541000 | -0.845037000 | -7.092655000 |
| H | -3.782376000 | -0.458097000 | -7.699272000 |
| C | -3.276798000 | -0.592679000 | -5.729032000 |
| H | -3.971887000 | -0.032127000 | -5.406179000 |
| C | -2.370648000 | -1.158534000 | -4.840730000 |
| H | -2.447361000 | -0.986054000 | -3.908999000 |
| C | 1.294102000  | -3.103954000 | -4.957612000 |
| C | 2.312667000  | -2.171833000 | -4.791380000 |
| H | 2.185533000  | -1.426604000 | -4.216347000 |
| C | 3.518305000  | -2.333788000 | -5.464100000 |
| H | 4.214238000  | -1.696879000 | -5.350777000 |
| C | 3.703887000  | -3.423672000 | -6.305650000 |
| H | 4.527819000  | -3.534067000 | -6.765697000 |
| C | 2.685322000  | -4.355793000 | -6.471882000 |
| H | 2.812714000  | -5.101014000 | -7.046188000 |
| C | 1.479683000  | -4.193837000 | -5.799162000 |
| H | 0.783996000  | -4.830748000 | -5.911784000 |
| C | -0.965356000 | -4.447102000 | -3.900480000 |
| C | -2.101781000 | -4.849847000 | -4.591382000 |
| H | -2.579841000 | -4.224252000 | -5.125792000 |
| C | -2.540976000 | -6.165770000 | -4.503071000 |
| H | -3.317543000 | -6.439856000 | -4.975949000 |
| C | -1.842115000 | -7.078947000 | -3.723858000 |
| H | -2.141374000 | -7.978334000 | -3.662404000 |
| C | -0.705690000 | -6.676201000 | -3.032956000 |
| H | -0.227520000 | -7.301207000 | -2.498702000 |
| C | -0.266495000 | -5.360279000 | -3.121267000 |
| H | 0.510211000  | -5.085611000 | -2.648519000 |
| C | 2.681402000  | -5.167932000 | -0.700513000 |
| C | 3.158692000  | -4.461749000 | -1.799203000 |
| H | 3.271832000  | -3.520672000 | -1.746268000 |
| C | 3.468225000  | -5.134114000 | -2.975814000 |
| H | 3.794975000  | -4.652555000 | -3.726378000 |
| C | 3.302100000  | -6.512663000 | -3.053735000 |
| H | 3.515226000  | -6.972094000 | -3.857026000 |
| C | 2.826376000  | -7.217158000 | -1.955045000 |
| H | 2.712301000  | -8.159767000 | -2.007564000 |

|   |              |              |              |
|---|--------------|--------------|--------------|
| C | 2.515277000  | -6.546481000 | -0.778434000 |
| H | 2.189141000  | -7.027884000 | -0.027455000 |
| C | 1.407780000  | -5.407180000 | 1.928032000  |
| C | 0.112854000  | -5.763967000 | 1.574789000  |
| H | -0.296136000 | -5.371771000 | 0.811316000  |
| C | -0.585486000 | -6.695946000 | 2.333222000  |
| H | -1.470167000 | -6.939828000 | 2.091355000  |
| C | 0.013693000  | -7.269393000 | 3.450094000  |
| H | -0.463443000 | -7.906321000 | 3.969673000  |
| C | 1.308283000  | -6.911734000 | 3.805934000  |
| H | 1.717328000  | -7.304773000 | 4.567953000  |
| C | 2.005326000  | -5.980627000 | 3.044903000  |
| H | 2.891389000  | -5.736740000 | 3.287940000  |
| C | 3.923881000  | -4.141770000 | 1.624139000  |
| C | 4.958568000  | -4.980194000 | 1.229338000  |
| H | 4.809125000  | -5.635163000 | 0.557215000  |
| C | 6.212465000  | -4.863059000 | 1.818942000  |
| H | 6.919943000  | -5.437423000 | 1.547620000  |
| C | 6.431945000  | -3.906684000 | 2.800750000  |
| H | 7.288943000  | -3.826088000 | 3.203837000  |
| C | 5.396923000  | -3.067387000 | 3.198149000  |
| H | 5.547126000  | -2.412476000 | 3.869648000  |
| C | 4.143026000  | -3.184522000 | 2.608544000  |
| H | 3.436291000  | -2.610182000 | 2.879243000  |
| C | 5.386193000  | 2.526084000  | 0.767005000  |
| C | 5.717242000  | 2.933043000  | -0.518696000 |
| H | 5.604709000  | 2.338149000  | -1.251234000 |
| C | 6.213683000  | 4.213756000  | -0.736876000 |
| H | 6.439921000  | 4.493335000  | -1.616295000 |
| C | 6.378804000  | 5.086695000  | 0.333243000  |
| H | 6.717982000  | 5.960990000  | 0.184881000  |
| C | 6.047820000  | 4.678048000  | 1.618944000  |
| H | 6.160827000  | 5.273503000  | 2.351144000  |
| C | 5.551379000  | 3.397335000  | 1.837124000  |
| H | 5.325612000  | 3.118343000  | 2.716231000  |
| C | 5.954238000  | -0.261475000 | 0.148829000  |
| C | 5.483364000  | -1.519076000 | -0.212206000 |
| H | 4.569848000  | -1.739936000 | -0.078519000 |
| C | 6.351089000  | -2.452147000 | -0.768044000 |
| H | 6.029238000  | -3.311587000 | -1.014302000 |
| C | 7.688122000  | -2.129306000 | -0.962848000 |
| H | 8.281046000  | -2.766801000 | -1.343181000 |
| C | 8.158996000  | -0.871705000 | -0.601812000 |
| H | 9.073479000  | -0.650372000 | -0.736253000 |
| C | 7.292903000  | 0.061367000  | -0.045974000 |
| H | 7.614107000  | 0.921305000  | 0.199504000  |
| C | 5.235139000  | 0.517518000  | 2.792958000  |
| C | 6.563370000  | 0.566789000  | 3.200746000  |
| H | 7.245907000  | 0.760591000  | 2.567480000  |
| C | 6.892905000  | 0.333375000  | 4.530602000  |
| H | 7.801853000  | 0.368551000  | 4.806444000  |
| C | 5.895571000  | 0.049875000  | 5.455268000  |
| H | 6.121097000  | -0.108291000 | 6.363129000  |
| C | 4.567070000  | -0.000211000 | 5.050078000  |
| H | 3.884393000  | -0.193120000 | 5.680876000  |
| C | 4.236173000  | 0.234018000  | 3.717624000  |

|   |              |              |              |
|---|--------------|--------------|--------------|
| H | 3.328413000  | 0.198937000  | 3.441912000  |
| C | 4.316050000  | 1.734110000  | -3.653729000 |
| C | 4.744341000  | 0.466947000  | -3.279707000 |
| H | 4.111062000  | -0.193114000 | -3.024800000 |
| C | 6.100946000  | 0.163046000  | -3.279707000 |
| H | 6.394844000  | -0.702927000 | -3.025060000 |
| C | 7.029464000  | 1.128813000  | -3.656326000 |
| H | 7.956284000  | 0.921977000  | -3.655313000 |
| C | 6.599476000  | 2.397664000  | -4.030349000 |
| H | 7.233960000  | 3.056678000  | -4.285307000 |
| C | 5.242936000  | 2.699877000  | -4.030349000 |
| H | 4.950178000  | 3.566508000  | -4.285047000 |
| C | 2.018301000  | 1.322090000  | -5.331634000 |
| C | 2.952050000  | 0.953487000  | -6.292663000 |
| H | 3.879975000  | 1.044710000  | -6.112327000 |
| C | 2.527828000  | 0.453628000  | -7.518624000 |
| H | 3.165263000  | 0.202749000  | -8.175319000 |
| C | 1.167956000  | 0.321556000  | -7.780959000 |
| H | 0.878605000  | -0.020424000 | -8.619133000 |
| C | 0.234272000  | 0.688470000  | -6.819930000 |
| H | -0.693340000 | 0.598407000  | -6.999980000 |
| C | 0.660125000  | 1.188330000  | -5.593969000 |
| H | 0.021356000  | 1.440369000  | -4.936989000 |
| C | 2.317065000  | 3.830298000  | -3.947233000 |
| C | 2.089353000  | 4.396364000  | -5.196570000 |
| H | 1.986491000  | 3.838008000  | -5.958640000 |
| C | 2.015707000  | 5.777613000  | -5.331634000 |
| H | 1.860371000  | 6.163694000  | -6.184223000 |
| C | 2.166239000  | 6.591979000  | -4.214762000 |
| H | 2.115365000  | 7.536824000  | -4.306683000 |
| C | 2.392320000  | 6.025913000  | -2.965424000 |
| H | 2.496511000  | 6.584284000  | -2.203562000 |
| C | 2.467868000  | 4.645480000  | -2.832958000 |
| H | 2.622644000  | 4.258606000  | -1.977954000 |
| N | -2.623233000 | -4.526039000 | 3.907547000  |
| N | -3.833341000 | -5.020816000 | 2.124068000  |
| C | -2.854489000 | -4.180955000 | 2.597816000  |
| C | -3.448360000 | -5.577756000 | 4.265783000  |
| C | -4.222948000 | -5.894462000 | 3.124181000  |
| C | -1.630338000 | -3.851645000 | 4.779313000  |
| H | -1.193492000 | -3.084308000 | 4.125678000  |
| C | -2.330829000 | -3.173805000 | 5.957194000  |
| H | -1.590734000 | -2.616405000 | 6.545807000  |
| H | -2.806756000 | -3.917091000 | 6.609027000  |
| H | -3.091870000 | -2.467866000 | 5.601035000  |
| C | -0.539772000 | -4.835863000 | 5.203036000  |
| H | -0.058522000 | -5.282743000 | 4.323787000  |
| H | -0.956201000 | -5.634362000 | 5.829817000  |
| H | 0.224856000  | -4.301231000 | 5.781319000  |
| C | -4.369778000 | -4.971721000 | 0.741879000  |
| C | -5.856443000 | -4.615323000 | 0.761084000  |
| H | -3.805510000 | -4.152284000 | 0.276041000  |
| H | -6.440685000 | -5.402896000 | 1.253282000  |
| H | -6.020165000 | -3.665159000 | 1.285264000  |
| N | -3.553090000 | -6.215883000 | 5.423401000  |
| N | -5.130524000 | -6.860849000 | 3.098552000  |

|   |              |              |              |
|---|--------------|--------------|--------------|
| C | -4.474788000 | -7.200132000 | 5.403601000  |
| C | -5.241690000 | -7.513696000 | 4.273328000  |
| H | -4.606422000 | -7.761516000 | 6.328192000  |
| H | -5.973155000 | -8.320332000 | 4.313878000  |
| H | -6.215680000 | -4.507408000 | -0.270517000 |
| C | -4.065386000 | -6.277382000 | 0.006927000  |
| H | -4.590130000 | -7.120168000 | 0.474071000  |
| H | -4.400090000 | -6.192233000 | -1.035005000 |
| H | -2.986817000 | -6.480035000 | 0.008017000  |
| N | 1.534044000  | 5.376129000  | 2.770064000  |
| N | 1.643650000  | 3.895208000  | 4.408607000  |
| C | 1.290444000  | 4.062585000  | 3.091342000  |
| C | 2.038629000  | 6.040812000  | 3.874087000  |
| C | 2.108787000  | 5.092877000  | 4.922916000  |
| C | 1.282590000  | 5.962015000  | 1.430612000  |
| H | 0.888767000  | 5.116624000  | 0.850011000  |
| C | 0.216809000  | 7.054576000  | 1.519945000  |
| H | -0.011065000 | 7.420710000  | 0.510530000  |
| H | 0.571847000  | 7.898163000  | 2.125071000  |
| H | -0.707081000 | 6.659212000  | 1.960961000  |
| C | 2.593369000  | 6.438839000  | 0.804467000  |
| H | 3.317880000  | 5.616395000  | 0.749222000  |
| H | 3.027356000  | 7.261971000  | 1.385825000  |
| H | 2.398049000  | 6.796539000  | -0.214748000 |
| C | 1.530714000  | 2.609510000  | 5.139941000  |
| C | 0.536141000  | 2.739960000  | 6.293790000  |
| H | 1.125349000  | 1.920058000  | 4.386805000  |
| H | 0.900989000  | 3.450992000  | 7.045579000  |
| H | -0.441852000 | 3.075590000  | 5.926008000  |
| N | 2.406332000  | 7.308070000  | 4.004867000  |
| N | 2.549207000  | 5.377620000  | 6.140785000  |
| C | 2.855305000  | 7.603869000  | 5.241633000  |
| C | 2.924767000  | 6.665341000  | 6.280054000  |
| H | 3.172646000  | 8.632527000  | 5.410467000  |
| H | 3.296438000  | 6.959931000  | 7.261087000  |
| H | 0.407838000  | 1.760741000  | 6.772922000  |
| C | 2.912700000  | 2.124223000  | 5.578312000  |
| H | 3.356497000  | 2.814800000  | 6.306334000  |
| H | 2.816952000  | 1.136569000  | 6.047644000  |
| H | 3.583109000  | 2.032773000  | 4.714269000  |

279

2-NHC\_T1

|    |           |           |           |
|----|-----------|-----------|-----------|
| Au | 0.112229  | 0.007988  | 0.225837  |
| Au | -1.893621 | 0.928039  | 1.925655  |
| Au | -2.475432 | -0.247988 | -0.758415 |
| Au | -1.442082 | -1.990552 | 1.405356  |
| Au | 0.603251  | -0.657152 | 2.866659  |
| Au | 0.539594  | 2.275713  | 1.833688  |
| Au | -1.119306 | 2.321170  | -0.618578 |
| Au | -0.021728 | -1.609138 | -1.963103 |
| Au | 1.404619  | -2.366749 | 0.535795  |
| Au | 2.763712  | 0.239765  | 0.659266  |
| Au | 1.289641  | 1.032019  | -1.962270 |
| Cl | -4.592086 | -0.534326 | -1.761758 |
| Cl | 0.966948  | -1.069629 | 5.198746  |
| P  | -3.595197 | 1.316558  | 3.440812  |

|   |           |           |           |
|---|-----------|-----------|-----------|
| P | -2.418310 | 3.699210  | -1.970792 |
| P | -0.379798 | -2.915242 | -3.846817 |
| P | 2.388063  | -4.447063 | 0.798816  |
| P | 4.896706  | 0.721840  | 1.373413  |
| P | 2.499325  | 2.068868  | -3.653646 |
| C | -4.574537 | 2.783289  | 2.970107  |
| C | -3.875107 | 3.907630  | 2.505942  |
| H | -2.785992 | 3.876193  | 2.436849  |
| C | -4.570008 | 5.044888  | 2.112063  |
| H | -4.017188 | 5.915269  | 1.755653  |
| C | -5.963730 | 5.061696  | 2.159388  |
| H | -6.511243 | 5.947248  | 1.831012  |
| C | -6.660114 | 3.945972  | 2.618728  |
| H | -7.750229 | 3.957948  | 2.653039  |
| C | -5.970389 | 2.806393  | 3.031084  |
| H | -6.517195 | 1.930841  | 3.386539  |
| C | -2.963723 | 1.676719  | 5.115348  |
| C | -2.078465 | 0.750573  | 5.678143  |
| H | -1.716583 | -0.094054 | 5.094112  |
| C | -1.635040 | 0.920184  | 6.983627  |
| H | -0.940938 | 0.192606  | 7.405795  |
| C | -2.041396 | 2.031470  | 7.721262  |
| H | -1.680190 | 2.173345  | 8.741900  |
| C | -2.895065 | 2.972446  | 7.149912  |
| H | -3.204483 | 3.848955  | 7.720869  |
| C | -3.368339 | 2.795392  | 5.849404  |
| H | -4.053513 | 3.522624  | 5.411664  |
| C | -4.784704 | -0.045783 | 3.732292  |
| C | -5.331111 | -0.263710 | 5.004050  |
| H | -5.092200 | 0.410830  | 5.827807  |
| C | -6.148524 | -1.368573 | 5.230264  |
| H | -6.550239 | -1.545951 | 6.228834  |
| C | -6.430474 | -2.253089 | 4.192240  |
| H | -7.048674 | -3.133884 | 4.373449  |
| C | -5.914513 | -2.020350 | 2.918319  |
| H | -6.149651 | -2.708890 | 2.108267  |
| C | -5.085433 | -0.926504 | 2.683586  |
| H | -4.653959 | -0.767336 | 1.693055  |
| C | -2.148278 | 3.460896  | -3.769185 |
| C | -2.134414 | 2.139813  | -4.230350 |
| H | -2.237699 | 1.316129  | -3.524491 |
| C | -2.015406 | 1.881931  | -5.590962 |
| H | -2.023600 | 0.853791  | -5.943583 |
| C | -1.887811 | 2.928035  | -6.499702 |
| H | -1.778886 | 2.716064  | -7.565464 |
| C | -1.908441 | 4.240316  | -6.043450 |
| H | -1.828194 | 5.064138  | -6.749995 |
| C | -2.047661 | 4.511688  | -4.682287 |
| H | -2.086437 | 5.543768  | -4.339495 |
| C | -4.203234 | 3.347978  | -1.791818 |
| C | -4.674341 | 2.708523  | -0.643110 |
| H | -3.974544 | 2.401715  | 0.131634  |
| C | -6.031021 | 2.432016  | -0.505888 |
| H | -6.384834 | 1.903281  | 0.377933  |
| C | -6.919813 | 2.798790  | -1.506823 |
| H | -7.982232 | 2.571284  | -1.402933 |



|   |           |           |           |
|---|-----------|-----------|-----------|
| C | -6.452652 | 3.433102  | -2.658579 |
| H | -7.146586 | 3.707101  | -3.452271 |
| C | -5.096926 | 3.701955  | -2.809227 |
| H | -4.732912 | 4.175236  | -3.721656 |
| C | -2.279215 | 5.503862  | -1.716496 |
| C | -3.324778 | 6.234461  | -1.141163 |
| H | -4.259599 | 5.734851  | -0.881852 |
| C | -3.169928 | 7.599261  | -0.903605 |
| H | -3.985673 | 8.162881  | -0.449142 |
| C | -1.989675 | 8.246331  | -1.262526 |
| H | -1.876242 | 9.317122  | -1.086105 |
| C | -0.953026 | 7.520902  | -1.849367 |
| H | -0.031174 | 8.027058  | -2.138473 |
| C | -1.083683 | 6.152239  | -2.056799 |
| H | -0.260367 | 5.585625  | -2.497643 |
| C | -1.582148 | -2.200404 | -5.029847 |
| C | -1.422777 | -2.277110 | -6.418447 |
| H | -0.515154 | -2.705452 | -6.847271 |
| C | -2.430314 | -1.800791 | -7.255969 |
| H | -2.306349 | -1.865395 | -8.338725 |
| C | -3.593772 | -1.251497 | -6.716720 |
| H | -4.377979 | -0.878936 | -7.377968 |
| C | -3.748901 | -1.168157 | -5.333454 |
| H | -4.640786 | -0.723007 | -4.888479 |
| C | -2.746036 | -1.638509 | -4.492472 |
| H | -2.888638 | -1.563007 | -3.413707 |
| C | 1.153400  | -3.155265 | -4.820528 |
| C | 2.170967  | -2.198745 | -4.712159 |
| H | 2.061670  | -1.376490 | -4.003110 |
| C | 3.316012  | -2.302233 | -5.496729 |
| H | 4.101547  | -1.549147 | -5.410718 |
| C | 3.452852  | -3.364844 | -6.388430 |
| H | 4.349414  | -3.445128 | -7.006375 |
| C | 2.454953  | -4.335701 | -6.478166 |
| H | 2.571394  | -5.178332 | -7.161450 |
| C | 1.307751  | -4.238838 | -5.692496 |
| H | 0.537478  | -5.011614 | -5.749246 |
| C | -1.014977 | -4.616263 | -3.603769 |
| C | -2.109254 | -5.116106 | -4.319345 |
| H | -2.641405 | -4.483779 | -5.031539 |
| C | -2.524001 | -6.431856 | -4.119447 |
| H | -3.379285 | -6.815539 | -4.677881 |
| C | -1.858139 | -7.247867 | -3.207900 |
| H | -2.193484 | -8.273543 | -3.047696 |
| C | -0.769969 | -6.749369 | -2.493018 |
| H | -0.252380 | -7.377931 | -1.767053 |
| C | -0.350009 | -5.438372 | -2.684798 |
| H | 0.500123  | -5.049247 | -2.122659 |
| C | 2.689973  | -5.291582 | -0.792407 |
| C | 3.158612  | -4.519772 | -1.864640 |
| H | 3.289359  | -3.442302 | -1.742202 |
| C | 3.429253  | -5.122518 | -3.087522 |
| H | 3.792380  | -4.519515 | -3.919174 |
| C | 3.213575  | -6.488743 | -3.254459 |
| H | 3.403075  | -6.952227 | -4.223950 |
| C | 2.746632  | -7.258591 | -2.191471 |

|   |           |           |           |
|---|-----------|-----------|-----------|
| H | 2.576689  | -8.328062 | -2.323938 |
| C | 2.490609  | -6.666106 | -0.956351 |
| H | 2.126552  | -7.268939 | -0.121624 |
| C | 1.327368  | -5.606931 | 1.720299  |
| C | -0.019975 | -5.685960 | 1.329491  |
| H | -0.392399 | -5.039398 | 0.533337  |
| C | -0.877532 | -6.574673 | 1.968473  |
| H | -1.925823 | -6.632129 | 1.668071  |
| C | -0.403519 | -7.374601 | 3.008714  |
| H | -1.083342 | -8.058480 | 3.520212  |
| C | 0.928780  | -7.283356 | 3.410106  |
| H | 1.296596  | -7.899266 | 4.232677  |
| C | 1.799825  | -6.402991 | 2.768113  |
| H | 2.844305  | -6.333663 | 3.081016  |
| C | 4.036757  | -4.425094 | 1.584740  |
| C | 5.108006  | -5.154859 | 1.053377  |
| H | 4.952086  | -5.815658 | 0.199957  |
| C | 6.379867  | -5.023164 | 1.605907  |
| H | 7.211759  | -5.589593 | 1.184793  |
| C | 6.590363  | -4.167525 | 2.683769  |
| H | 7.591482  | -4.047718 | 3.101557  |
| C | 5.523520  | -3.452563 | 3.224350  |
| H | 5.689533  | -2.779879 | 4.064471  |
| C | 4.248591  | -3.573497 | 2.678805  |
| H | 3.418982  | -2.993562 | 3.089924  |
| C | 5.223578  | 2.517206  | 1.267345  |
| C | 5.253225  | 3.105635  | -0.000413 |
| H | 5.170642  | 2.483817  | -0.888091 |
| C | 5.386297  | 4.483077  | -0.127215 |
| H | 5.426602  | 4.927146  | -1.119497 |
| C | 5.464969  | 5.289537  | 1.004076  |
| H | 5.546005  | 6.373210  | 0.907290  |
| C | 5.430546  | 4.709078  | 2.263866  |
| H | 5.492354  | 5.334334  | 3.152831  |
| C | 5.314348  | 3.326152  | 2.399379  |
| H | 5.283708  | 2.883970  | 3.390260  |
| C | 6.275236  | -0.096666 | 0.494156  |
| C | 6.094057  | -1.433187 | 0.121474  |
| H | 5.133040  | -1.920462 | 0.292864  |
| C | 7.141397  | -2.139032 | -0.458344 |
| H | 6.992823  | -3.180204 | -0.743426 |
| C | 8.371648  | -1.517313 | -0.668016 |
| H | 9.193698  | -2.073677 | -1.119748 |
| C | 8.550701  | -0.185930 | -0.302505 |
| H | 9.512195  | 0.301247  | -0.466999 |
| C | 7.505382  | 0.529149  | 0.275959  |
| H | 7.643009  | 1.576916  | 0.545244  |
| C | 5.220166  | 0.241775  | 3.111920  |
| C | 6.502975  | 0.370799  | 3.657320  |
| H | 7.318685  | 0.775954  | 3.059671  |
| C | 6.740548  | -0.030056 | 4.967854  |
| H | 7.737877  | 0.081726  | 5.392503  |
| C | 5.712151  | -0.583794 | 5.730601  |
| H | 5.906830  | -0.904342 | 6.755773  |
| C | 4.443030  | -0.731433 | 5.183310  |
| H | 3.621615  | -1.163531 | 5.755686  |

|   |           |           |           |
|---|-----------|-----------|-----------|
| C | 4.195149  | -0.311246 | 3.879841  |
| H | 3.194118  | -0.422278 | 3.462237  |
| C | 4.306212  | 1.995468  | -3.381972 |
| C | 4.830643  | 0.774499  | -2.931928 |
| H | 4.157515  | -0.042374 | -2.662160 |
| C | 6.205189  | 0.609685  | -2.815809 |
| H | 6.608065  | -0.344278 | -2.475088 |
| C | 7.062546  | 1.668621  | -3.110171 |
| H | 8.139318  | 1.541608  | -2.993699 |
| C | 6.545531  | 2.887710  | -3.542999 |
| H | 7.215614  | 3.717187  | -3.774633 |
| C | 5.170297  | 3.050389  | -3.694966 |
| H | 4.772516  | 3.996678  | -4.065622 |
| C | 2.332254  | 1.310529  | -5.311057 |
| C | 3.399062  | 1.287158  | -6.218693 |
| H | 4.368033  | 1.702941  | -5.941360 |
| C | 3.226469  | 0.718138  | -7.476576 |
| H | 4.062833  | 0.692248  | -8.176256 |
| C | 1.989966  | 0.190592  | -7.843290 |
| H | 1.857698  | -0.253199 | -8.831037 |
| C | 0.927640  | 0.220811  | -6.944829 |
| H | -0.039669 | -0.191296 | -7.224535 |
| C | 1.100242  | 0.759647  | -5.673889 |
| H | 0.279580  | 0.751884  | -4.956035 |
| C | 2.155135  | 3.845515  | -3.930251 |
| C | 1.544441  | 4.296972  | -5.105148 |
| H | 1.239836  | 3.587616  | -5.875563 |
| C | 1.328159  | 5.660192  | -5.297364 |
| H | 0.843809  | 6.002943  | -6.212830 |
| C | 1.750358  | 6.579282  | -4.342148 |
| H | 1.609978  | 7.648115  | -4.512197 |
| C | 2.348763  | 6.129691  | -3.164379 |
| H | 2.681295  | 6.844766  | -2.413535 |
| C | 2.520095  | 4.767840  | -2.938323 |
| H | 2.961101  | 4.419415  | -2.001672 |
| N | -2.739468 | -3.853583 | 3.381648  |
| N | -3.636914 | -4.123423 | 1.381514  |
| C | -2.679986 | -3.435156 | 2.078947  |
| C | -3.713509 | -4.823642 | 3.509780  |
| C | -4.288273 | -4.995485 | 2.233507  |
| C | -1.864558 | -3.342285 | 4.466296  |
| H | -1.347036 | -2.488292 | 4.007420  |
| C | -2.695855 | -2.849451 | 5.639665  |
| H | -2.022950 | -2.357572 | 6.357494  |
| H | -3.208501 | -3.682510 | 6.141531  |
| H | -3.446962 | -2.121025 | 5.305992  |
| C | -0.828637 | -4.384590 | 4.852979  |
| H | -0.209690 | -4.651404 | 3.985493  |
| H | -1.312226 | -5.290460 | 5.250919  |
| H | -0.170188 | -3.953468 | 5.621919  |
| C | -3.865331 | -4.006155 | -0.078257 |
| C | -5.308470 | -3.639495 | -0.386156 |
| H | -3.210557 | -3.177587 | -0.387086 |
| H | -5.997154 | -4.412456 | -0.016054 |
| H | -5.566206 | -2.659833 | 0.034471  |
| N | -4.076030 | -5.517256 | 4.582911  |

|   |           |           |           |
|---|-----------|-----------|-----------|
| N | -5.258310 | -5.861601 | 1.964070  |
| C | -5.069463 | -6.396076 | 4.319786  |
| C | -5.642346 | -6.562190 | 3.056581  |
| H | -5.417883 | -6.998484 | 5.161792  |
| H | -6.440748 | -7.292556 | 2.907072  |
| H | -5.418978 | -3.549386 | -1.475976 |
| C | -3.425829 | -5.289946 | -0.763115 |
| H | -4.060435 | -6.135025 | -0.457295 |
| H | -3.508144 | -5.164446 | -1.851588 |
| H | -2.379494 | -5.520899 | -0.528288 |
| N | 1.793745  | 4.987718  | 2.251632  |
| N | 2.284396  | 3.670429  | 3.952389  |
| C | 1.671559  | 3.702926  | 2.722020  |
| C | 2.457810  | 5.767509  | 3.176322  |
| C | 2.771327  | 4.927858  | 4.262579  |
| C | 1.041213  | 5.496839  | 1.089017  |
| H | 0.784555  | 4.594933  | 0.511744  |
| C | -0.242288 | 6.151395  | 1.588339  |
| H | -0.853343 | 6.481555  | 0.735385  |
| H | -0.008895 | 7.023981  | 2.219383  |
| H | -0.823856 | 5.426381  | 2.177867  |
| C | 1.906674  | 6.411069  | 0.239698  |
| H | 2.829760  | 5.891166  | -0.054234 |
| H | 2.175577  | 7.323420  | 0.787410  |
| H | 1.338797  | 6.679128  | -0.657408 |
| C | 2.135598  | 2.540598  | 4.900150  |
| C | 0.874164  | 2.757799  | 5.724093  |
| H | 2.000132  | 1.656028  | 4.260565  |
| H | 0.955791  | 3.681845  | 6.320171  |
| H | -0.015186 | 2.817439  | 5.077714  |
| N | 2.772974  | 7.057495  | 3.116065  |
| N | 3.430443  | 5.335679  | 5.341750  |
| C | 3.458127  | 7.474957  | 4.208666  |
| C | 3.777150  | 6.644122  | 5.278698  |
| H | 3.753057  | 8.526426  | 4.222832  |
| H | 4.328456  | 7.038034  | 6.134911  |
| H | 0.747847  | 1.903266  | 6.400498  |
| C | 3.360117  | 2.349149  | 5.782097  |
| H | 3.488240  | 3.190889  | 6.473612  |
| H | 3.212665  | 1.424775  | 6.357563  |
| H | 4.280506  | 2.233862  | 5.192081  |

279

2-NHC\_S1

|    |           |           |           |
|----|-----------|-----------|-----------|
| Au | 0.112229  | 0.007988  | 0.225837  |
| Au | -1.893621 | 0.928039  | 1.925655  |
| Au | -2.475432 | -0.247988 | -0.758415 |
| Au | -1.442082 | -1.990552 | 1.405356  |
| Au | 0.603251  | -0.657152 | 2.866659  |
| Au | 0.539594  | 2.275713  | 1.833688  |
| Au | -1.119306 | 2.321170  | -0.618578 |
| Au | -0.021728 | -1.609138 | -1.963103 |
| Au | 1.404619  | -2.366749 | 0.535795  |
| Au | 2.763712  | 0.239765  | 0.659266  |
| Au | 1.289641  | 1.032019  | -1.962270 |
| Cl | -4.592086 | -0.534326 | -1.761758 |
| Cl | 0.966948  | -1.069629 | 5.198746  |

|   |           |           |           |
|---|-----------|-----------|-----------|
| P | -3.595197 | 1.316558  | 3.440812  |
| P | -2.418310 | 3.699210  | -1.970792 |
| P | -0.379798 | -2.915242 | -3.846817 |
| P | 2.388063  | -4.447063 | 0.798816  |
| P | 4.896706  | 0.721840  | 1.373413  |
| P | 2.499325  | 2.068868  | -3.653646 |
| C | -4.574537 | 2.783289  | 2.970107  |
| C | -3.875107 | 3.907630  | 2.505942  |
| H | -2.785992 | 3.876193  | 2.436849  |
| C | -4.570008 | 5.044888  | 2.112063  |
| H | -4.017188 | 5.915269  | 1.755653  |
| C | -5.963730 | 5.061696  | 2.159388  |
| H | -6.511243 | 5.947248  | 1.831012  |
| C | -6.660114 | 3.945972  | 2.618728  |
| H | -7.750229 | 3.957948  | 2.653039  |
| C | -5.970389 | 2.806393  | 3.031084  |
| H | -6.517195 | 1.930841  | 3.386539  |
| C | -2.963723 | 1.676719  | 5.115348  |
| C | -2.078465 | 0.750573  | 5.678143  |
| H | -1.716583 | -0.094054 | 5.094112  |
| C | -1.635040 | 0.920184  | 6.983627  |
| H | -0.940938 | 0.192606  | 7.405795  |
| C | -2.041396 | 2.031470  | 7.721262  |
| H | -1.680190 | 2.173345  | 8.741900  |
| C | -2.895065 | 2.972446  | 7.149912  |
| H | -3.204483 | 3.848955  | 7.720869  |
| C | -3.368339 | 2.795392  | 5.849404  |
| H | -4.053513 | 3.522624  | 5.411664  |
| C | -4.784704 | -0.045783 | 3.732292  |
| C | -5.331111 | -0.263710 | 5.004050  |
| H | -5.092200 | 0.410830  | 5.827807  |
| C | -6.148524 | -1.368573 | 5.230264  |
| H | -6.550239 | -1.545951 | 6.228834  |
| C | -6.430474 | -2.253089 | 4.192240  |
| H | -7.048674 | -3.133884 | 4.373449  |
| C | -5.914513 | -2.020350 | 2.918319  |
| H | -6.149651 | -2.708890 | 2.108267  |
| C | -5.085433 | -0.926504 | 2.683586  |
| H | -4.653959 | -0.767336 | 1.693055  |
| C | -2.148278 | 3.460896  | -3.769185 |
| C | -2.134414 | 2.139813  | -4.230350 |
| H | -2.237699 | 1.316129  | -3.524491 |
| C | -2.015406 | 1.881931  | -5.590962 |
| H | -2.023600 | 0.853791  | -5.943583 |
| C | -1.887811 | 2.928035  | -6.499702 |
| H | -1.778886 | 2.716064  | -7.565464 |
| C | -1.908441 | 4.240316  | -6.043450 |
| H | -1.828194 | 5.064138  | -6.749995 |
| C | -2.047661 | 4.511688  | -4.682287 |
| H | -2.086437 | 5.543768  | -4.339495 |
| C | -4.203234 | 3.347978  | -1.791818 |
| C | -4.674341 | 2.708523  | -0.643110 |
| H | -3.974544 | 2.401715  | 0.131634  |
| C | -6.031021 | 2.432016  | -0.505888 |
| H | -6.384834 | 1.903281  | 0.377933  |
| C | -6.919813 | 2.798790  | -1.506823 |

|   |           |           |           |
|---|-----------|-----------|-----------|
| H | -7.982232 | 2.571284  | -1.402933 |
| C | -6.452652 | 3.433102  | -2.658579 |
| H | -7.146586 | 3.707101  | -3.452271 |
| C | -5.096926 | 3.701955  | -2.809227 |
| H | -4.732912 | 4.175236  | -3.721656 |
| C | -2.279215 | 5.503862  | -1.716496 |
| C | -3.324778 | 6.234461  | -1.141163 |
| H | -4.259599 | 5.734851  | -0.881852 |
| C | -3.169928 | 7.599261  | -0.903605 |
| H | -3.985673 | 8.162881  | -0.449142 |
| C | -1.989675 | 8.246331  | -1.262526 |
| H | -1.876242 | 9.317122  | -1.086105 |
| C | -0.953026 | 7.520902  | -1.849367 |
| H | -0.031174 | 8.027058  | -2.138473 |
| C | -1.083683 | 6.152239  | -2.056799 |
| H | -0.260367 | 5.585625  | -2.497643 |
| C | -1.582148 | -2.200404 | -5.029847 |
| C | -1.422777 | -2.277110 | -6.418447 |
| H | -0.515154 | -2.705452 | -6.847271 |
| C | -2.430314 | -1.800791 | -7.255969 |
| H | -2.306349 | -1.865395 | -8.338725 |
| C | -3.593772 | -1.251497 | -6.716720 |
| H | -4.377979 | -0.878936 | -7.377968 |
| C | -3.748901 | -1.168157 | -5.333454 |
| H | -4.640786 | -0.723007 | -4.888479 |
| C | -2.746036 | -1.638509 | -4.492472 |
| H | -2.888638 | -1.563007 | -3.413707 |
| C | 1.153400  | -3.155265 | -4.820528 |
| C | 2.170967  | -2.198745 | -4.712159 |
| H | 2.061670  | -1.376490 | -4.003110 |
| C | 3.316012  | -2.302233 | -5.496729 |
| H | 4.101547  | -1.549147 | -5.410718 |
| C | 3.452852  | -3.364844 | -6.388430 |
| H | 4.349414  | -3.445128 | -7.006375 |
| C | 2.454953  | -4.335701 | -6.478166 |
| H | 2.571394  | -5.178332 | -7.161450 |
| C | 1.307751  | -4.238838 | -5.692496 |
| H | 0.537478  | -5.011614 | -5.749246 |
| C | -1.014977 | -4.616263 | -3.603769 |
| C | -2.109254 | -5.116106 | -4.319345 |
| H | -2.641405 | -4.483779 | -5.031539 |
| C | -2.524001 | -6.431856 | -4.119447 |
| H | -3.379285 | -6.815539 | -4.677881 |
| C | -1.858139 | -7.247867 | -3.207900 |
| H | -2.193484 | -8.273543 | -3.047696 |
| C | -0.769969 | -6.749369 | -2.493018 |
| H | -0.252380 | -7.377931 | -1.767053 |
| C | -0.350009 | -5.438372 | -2.684798 |
| H | 0.500123  | -5.049247 | -2.122659 |
| C | 2.689973  | -5.291582 | -0.792407 |
| C | 3.158612  | -4.519772 | -1.864640 |
| H | 3.289359  | -3.442302 | -1.742202 |
| C | 3.429253  | -5.122518 | -3.087522 |
| H | 3.792380  | -4.519515 | -3.919174 |
| C | 3.213575  | -6.488743 | -3.254459 |
| H | 3.403075  | -6.952227 | -4.223950 |

|   |           |           |           |
|---|-----------|-----------|-----------|
| C | 2.746632  | -7.258591 | -2.191471 |
| H | 2.576689  | -8.328062 | -2.323938 |
| C | 2.490609  | -6.666106 | -0.956351 |
| H | 2.126552  | -7.268939 | -0.121624 |
| C | 1.327368  | -5.606931 | 1.720299  |
| C | -0.019975 | -5.685960 | 1.329491  |
| H | -0.392399 | -5.039398 | 0.533337  |
| C | -0.877532 | -6.574673 | 1.968473  |
| H | -1.925823 | -6.632129 | 1.668071  |
| C | -0.403519 | -7.374601 | 3.008714  |
| H | -1.083342 | -8.058480 | 3.520212  |
| C | 0.928780  | -7.283356 | 3.410106  |
| H | 1.296596  | -7.899266 | 4.232677  |
| C | 1.799825  | -6.402991 | 2.768113  |
| H | 2.844305  | -6.333663 | 3.081016  |
| C | 4.036757  | -4.425094 | 1.584740  |
| C | 5.108006  | -5.154859 | 1.053377  |
| H | 4.952086  | -5.815658 | 0.199957  |
| C | 6.379867  | -5.023164 | 1.605907  |
| H | 7.211759  | -5.589593 | 1.184793  |
| C | 6.590363  | -4.167525 | 2.683769  |
| H | 7.591482  | -4.047718 | 3.101557  |
| C | 5.523520  | -3.452563 | 3.224350  |
| H | 5.689533  | -2.779879 | 4.064471  |
| C | 4.248591  | -3.573497 | 2.678805  |
| H | 3.418982  | -2.993562 | 3.089924  |
| C | 5.223578  | 2.517206  | 1.267345  |
| C | 5.253225  | 3.105635  | -0.000413 |
| H | 5.170642  | 2.483817  | -0.888091 |
| C | 5.386297  | 4.483077  | -0.127215 |
| H | 5.426602  | 4.927146  | -1.119497 |
| C | 5.464969  | 5.289537  | 1.004076  |
| H | 5.546005  | 6.373210  | 0.907290  |
| C | 5.430546  | 4.709078  | 2.263866  |
| H | 5.492354  | 5.334334  | 3.152831  |
| C | 5.314348  | 3.326152  | 2.399379  |
| H | 5.283708  | 2.883970  | 3.390260  |
| C | 6.275236  | -0.096666 | 0.494156  |
| C | 6.094057  | -1.433187 | 0.121474  |
| H | 5.133040  | -1.920462 | 0.292864  |
| C | 7.141397  | -2.139032 | -0.458344 |
| H | 6.992823  | -3.180204 | -0.743426 |
| C | 8.371648  | -1.517313 | -0.668016 |
| H | 9.193698  | -2.073677 | -1.119748 |
| C | 8.550701  | -0.185930 | -0.302505 |
| H | 9.512195  | 0.301247  | -0.466999 |
| C | 7.505382  | 0.529149  | 0.275959  |
| H | 7.643009  | 1.576916  | 0.545244  |
| C | 5.220166  | 0.241775  | 3.111920  |
| C | 6.502975  | 0.370799  | 3.657320  |
| H | 7.318685  | 0.775954  | 3.059671  |
| C | 6.740548  | -0.030056 | 4.967854  |
| H | 7.737877  | 0.081726  | 5.392503  |
| C | 5.712151  | -0.583794 | 5.730601  |
| H | 5.906830  | -0.904342 | 6.755773  |
| C | 4.443030  | -0.731433 | 5.183310  |

|   |           |           |           |
|---|-----------|-----------|-----------|
| H | 3.621615  | -1.163531 | 5.755686  |
| C | 4.195149  | -0.311246 | 3.879841  |
| H | 3.194118  | -0.422278 | 3.462237  |
| C | 4.306212  | 1.995468  | -3.381972 |
| C | 4.830643  | 0.774499  | -2.931928 |
| H | 4.157515  | -0.042374 | -2.662160 |
| C | 6.205189  | 0.609685  | -2.815809 |
| H | 6.608065  | -0.344278 | -2.475088 |
| C | 7.062546  | 1.668621  | -3.110171 |
| H | 8.139318  | 1.541608  | -2.993699 |
| C | 6.545531  | 2.887710  | -3.542999 |
| H | 7.215614  | 3.717187  | -3.774633 |
| C | 5.170297  | 3.050389  | -3.694966 |
| H | 4.772516  | 3.996678  | -4.065622 |
| C | 2.332254  | 1.310529  | -5.311057 |
| C | 3.399062  | 1.287158  | -6.218693 |
| H | 4.368033  | 1.702941  | -5.941360 |
| C | 3.226469  | 0.718138  | -7.476576 |
| H | 4.062833  | 0.692248  | -8.176256 |
| C | 1.989966  | 0.190592  | -7.843290 |
| H | 1.857698  | -0.253199 | -8.831037 |
| C | 0.927640  | 0.220811  | -6.944829 |
| H | -0.039669 | -0.191296 | -7.224535 |
| C | 1.100242  | 0.759647  | -5.673889 |
| H | 0.279580  | 0.751884  | -4.956035 |
| C | 2.155135  | 3.845515  | -3.930251 |
| C | 1.544441  | 4.296972  | -5.105148 |
| H | 1.239836  | 3.587616  | -5.875563 |
| C | 1.328159  | 5.660192  | -5.297364 |
| H | 0.843809  | 6.002943  | -6.212830 |
| C | 1.750358  | 6.579282  | -4.342148 |
| H | 1.609978  | 7.648115  | -4.512197 |
| C | 2.348763  | 6.129691  | -3.164379 |
| H | 2.681295  | 6.844766  | -2.413535 |
| C | 2.520095  | 4.767840  | -2.938323 |
| H | 2.961101  | 4.419415  | -2.001672 |
| N | -2.739468 | -3.853583 | 3.381648  |
| N | -3.636914 | -4.123423 | 1.381514  |
| C | -2.679986 | -3.435156 | 2.078947  |
| C | -3.713509 | -4.823642 | 3.509780  |
| C | -4.288273 | -4.995485 | 2.233507  |
| C | -1.864558 | -3.342285 | 4.466296  |
| H | -1.347036 | -2.488292 | 4.007420  |
| C | -2.695855 | -2.849451 | 5.639665  |
| H | -2.022950 | -2.357572 | 6.357494  |
| H | -3.208501 | -3.682510 | 6.141531  |
| H | -3.446962 | -2.121025 | 5.305992  |
| C | -0.828637 | -4.384590 | 4.852979  |
| H | -0.209690 | -4.651404 | 3.985493  |
| H | -1.312226 | -5.290460 | 5.250919  |
| H | -0.170188 | -3.953468 | 5.621919  |
| C | -3.865331 | -4.006155 | -0.078257 |
| C | -5.308470 | -3.639495 | -0.386156 |
| H | -3.210557 | -3.177587 | -0.387086 |
| H | -5.997154 | -4.412456 | -0.016054 |
| H | -5.566206 | -2.659833 | 0.034471  |



|   |           |           |           |
|---|-----------|-----------|-----------|
| N | -4.076030 | -5.517256 | 4.582911  |
| N | -5.258310 | -5.861601 | 1.964070  |
| C | -5.069463 | -6.396076 | 4.319786  |
| C | -5.642346 | -6.562190 | 3.056581  |
| H | -5.417883 | -6.998484 | 5.161792  |
| H | -6.440748 | -7.292556 | 2.907072  |
| H | -5.418978 | -3.549386 | -1.475976 |
| C | -3.425829 | -5.289946 | -0.763115 |
| H | -4.060435 | -6.135025 | -0.457295 |
| H | -3.508144 | -5.164446 | -1.851588 |
| H | -2.379494 | -5.520899 | -0.528288 |
| N | 1.793745  | 4.987718  | 2.251632  |
| N | 2.284396  | 3.670429  | 3.952389  |
| C | 1.671559  | 3.702926  | 2.722020  |
| C | 2.457810  | 5.767509  | 3.176322  |
| C | 2.771327  | 4.927858  | 4.262579  |
| C | 1.041213  | 5.496839  | 1.089017  |
| H | 0.784555  | 4.594933  | 0.511744  |
| C | -0.242288 | 6.151395  | 1.588339  |
| H | -0.853343 | 6.481555  | 0.735385  |
| H | -0.008895 | 7.023981  | 2.219383  |
| H | -0.823856 | 5.426381  | 2.177867  |
| C | 1.906674  | 6.411069  | 0.239698  |
| H | 2.829760  | 5.891166  | -0.054234 |
| H | 2.175577  | 7.323420  | 0.787410  |
| H | 1.338797  | 6.679128  | -0.657408 |
| C | 2.135598  | 2.540598  | 4.900150  |
| C | 0.874164  | 2.757799  | 5.724093  |
| H | 2.000132  | 1.656028  | 4.260565  |
| H | 0.955791  | 3.681845  | 6.320171  |
| H | -0.015186 | 2.817439  | 5.077714  |
| N | 2.772974  | 7.057495  | 3.116065  |
| N | 3.430443  | 5.335679  | 5.341750  |
| C | 3.458127  | 7.474957  | 4.208666  |
| C | 3.777150  | 6.644122  | 5.278698  |
| H | 3.753057  | 8.526426  | 4.222832  |
| H | 4.328456  | 7.038034  | 6.134911  |
| H | 0.747847  | 1.903266  | 6.400498  |
| C | 3.360117  | 2.349149  | 5.782097  |
| H | 3.488240  | 3.190889  | 6.473612  |
| H | 3.212665  | 1.424775  | 6.357563  |
| H | 4.280506  | 2.233862  | 5.192081  |
